# Supplementary material for: Highly convergent modular access to poly-carbon substituted cyclopropanes via Cu(i)-catalyzed three-component cyclopropene carboallylation
Source: Royal Society of Chemistry journal article supplement (doi:10.1039/c9qo00902g), 2019-01-01
Supplement: c9qo00902g1.pdf [file c9qo00902g1.pdf]

## Supporting Information

### Highly convergent modular access to poly-carbon substituted cyclopropanes *via* Cu(I)-catalyzed multicomponent cyclopropene carboallylation

Hexin Li,<sup>a</sup> Mengru Zhang,<sup>a</sup> Haroon Mehfooz,<sup>a</sup> Dongxia Zhu,<sup>a</sup> Jinbo Zhao<sup>a,\*</sup> and Qian Zhang<sup>a,b,\*</sup>

<sup>a</sup> *Key Laboratory of Functional Molecule Synthesis of Jilin Province, Department of Chemistry, Northeast Normal University, Changchun, 130024 P. R. China*

<sup>b</sup> *State Key Laboratory of Organometallic Chemistry, Shanghai Institute of Organic Chemistry, 345 Lingling Rd, Shanghai 200032 P. R. China*  
zhaojb100@nenu.edu.cn; zhangq651@nenu.edu.cn

### Table of Contents

|                                                                    |           |
|--------------------------------------------------------------------|-----------|
| <b>1. General information.....</b>                                 | <b>2</b>  |
| <b>2. Experimental procedures</b>                                  |           |
| 2.1 Preparation of starting materials.....                         | 3         |
| 2.2 Reaction optimization.....                                     | 5         |
| 2.3 Procedures.....                                                | 7         |
| 2.4 Crystal structure data of compound 4e.....                     | 8         |
| <b>3. Compound characterization.....</b>                           | <b>9</b>  |
| <b>References.....</b>                                             | <b>27</b> |
| <b>4. NMR spectra and HPLC Chromatograph of new compounds.....</b> | <b>28</b> |

## 1. General information.

### *Instrumentation and software.*

All  $^1\text{H}$  NMR and  $^{13}\text{C}$  NMR spectra were recorded at 25 °C on a Bruker 600 MHz spectrometer. Chemical shifts ( $\delta$ ) are given in parts per million (ppm) relative to internal standards (TMS,  $^1\text{H}$ -NMR:  $\delta$  0 ppm and  $^{13}\text{C}$ -NMR:  $\delta$  77.0 ppm for  $\text{CDCl}_3$ ). The multiplicity of the NMR signals is assigned as follows: s = singlet, brs = broad singlet, d = doublet, t = triplet, q = quadruplet, m = multiplet, or combinations thereof. NMR yields were determined by addition of a known amount, approximately 20.5  $\mu\text{l}$ , of nitromethane to the crude product and dissolving everything in  $\text{CDCl}_3$ , followed by  $^1\text{H}$ NMR-analysis. Flash chromatography was performed on silica gel 60 (particle size 300-400 mesh ASTM, purchased from Taizhou, China). Enantioselectivities were determined by Agilent 1260 HPLC system with Darcel Chiralpak columns.

### *Solvents and reagents.*

Unless otherwise noted, all reactions were conducted under a nitrogen atmosphere. Copper salts and other commercial chemicals were used without further purification. Ether was distilled from sodium with benzophenone as indicator. Cyclopropenes **1a-1f**, **1h-1j**,<sup>[1a-1b]</sup> **1g**<sup>[1c]</sup> and aryl boronic esters<sup>[2]</sup> were synthesized according to literature; the structure of existing compounds were verified by comparison with reported  $^1\text{H}$  NMR data. Allyl bromides were purchased from commercial sources or prepared from the literature [2-(bromomethyl)but-1-ene].<sup>[3]</sup>

## Experimental procedures

### 2.1 Preparation of starting materials

Cyclopropenes **1a-1f** and **1h-1j** used in this study (Scheme S1) were synthesized according to literature [1a-1b] by a 4-step procedure typically from the corresponding ketones; cyclopropene **1g** was synthesized according to literature by a 3-step procedure from Tosylhydrazone.<sup>[1c]</sup>

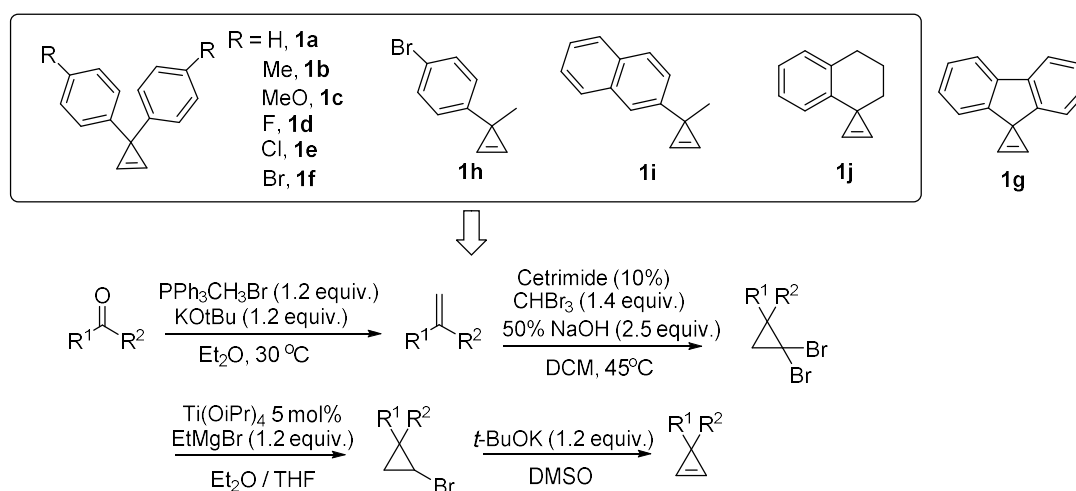

Scheme S1.

#### Substrates Preparation:

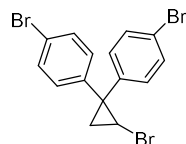

**4,4'-(2-bromocyclopropane-1,1-diyl)bis(bromobenzene):**  $\text{Ti}(\text{O}^i\text{Pr})_4$  (548  $\mu\text{L}$ , 1.9 mmol) was added to a solution of 4,4'-(2,2-dibromocyclopropane-1,1-diyl)bis(bromobenzene) (9.36 g, 18.5 mmol) in and  $\text{Et}_2\text{O}$  (40 mL) at 0 °C.  $\text{EtMgBr}$  (7.5 mL, 22.2 mmol; 3.0 M solution in  $\text{Et}_2\text{O}$ ) was added dropwise to it over 2 h and the mixture was further stirred for 1 h while gradually raising the temperature to room temperature. The reaction was slowly quenched with saturated  $\text{NH}_4\text{Cl}$  aq and 1 M  $\text{HCl}$  aq was added to it. After extraction with  $\text{Et}_2\text{O}$ , the organic layer was washed with saturated  $\text{NaCl}$  aq, dried over  $\text{MgSO}_4$ , filtered, and concentrated *in vacuo*. The residue was chromatographed on silica gel with petroleum ether to afford the title compound (6.17 g, 78% yield) as a yellow solid.

M.p. = 73 - 75°C.  $^1\text{H}$  NMR (600 MHz,  $\text{CDCl}_3$ )  $\delta$  7.50 - 7.46 (m, 2H), 7.40 - 7.36 (m, 2H), 7.25 - 7.21 (m, 2H), 7.08 - 7.05 (m, 2H), 3.64 - 3.60 (m, 1H), 1.87 - 1.82 (m, 1H), 1.80 - 1.76 (m, 1H).  $^{13}\text{C}$  NMR (151 MHz,  $\text{CDCl}_3$ )  $\delta$  142.53, 139.18, 132.03, 131.79, 131.54, 129.36, 121.46, 120.85, 35.33, 27.50, 23.99. HRMS (ESI-TOF) ( $m/z$ ): Calcd for  $\text{C}_{15}\text{H}_{12}\text{Br}_3$  ( $[\text{M} + \text{H}]^+$ ), 428.8484; found 428.8486.

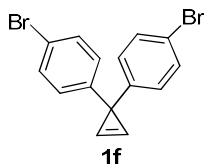

**4,4'-(cycloprop-2-ene-1,1-diyl)bis(bromobenzene) (1f):** KO<sup>t</sup>Bu (0.67 g, 6.0 mmol) was added portionwise to a solution of 4,4'-(2-bromocyclopropane-1,1-diyl)bis(bromobenzene) (2.14 g, 5.0 mmol) in DMSO (10 mL), and the mixture was stirred for 18 h. The reaction was quenched with H<sub>2</sub>O aq and extracted with Et<sub>2</sub>O. The organic layer was washed with saturated NaCl aq, dried over MgSO<sub>4</sub>, and concentrated *in vacuo*. The residue was chromatographed on silica gel with petroleum ether to afford **1f** (1.50 g, 86% yield) as a yellow solid.

M.p. = 83 - 88°C. <sup>1</sup>H NMR (600 MHz, CDCl<sub>3</sub>) δ 7.47–7.44 (m, 1H), 7.40 (s, 2H), 7.27–7.24 (m, 1H), 7.23 – 7.19 (m, 1H), 7.17 – 7.12 (m, 2H), 7.07–7.00 (m, 1H), 6.90–6.86 (m, 2H). <sup>13</sup>C NMR (151 MHz, CDCl<sub>3</sub>) δ 146.93, 145.09, 133.10, 131.34, 128.17, 127.83, 126.58, 125.33, 124.96, 113.02, 32.89. HRMS (ESI-TOF) (*m/z*): Calcd for C<sub>15</sub>H<sub>10</sub>Br<sub>2</sub> ([M+H]<sup>+</sup>), 348.9222; found 348.9225.

## 2.2 Reaction optimization

**Table S1.** Optimization of the cyclopropene carboallylation (I): solvent screening.

| Entry    | Solvent           | Yield/%   |
|----------|-------------------|-----------|
| 1        | THF               | trace     |
| 2        | dioxane           | trace     |
| 3        | Et <sub>2</sub> O | 40        |
| <b>4</b> | <b>Toluene</b>    | <b>40</b> |
| 5        | cyclohexane       | 20        |

**Table S2.** Optimization of the cyclopropene carboallylation (II): evaluation of ligands.

| Entry    | Ligand                                                                | Yield/%   |
|----------|-----------------------------------------------------------------------|-----------|
| 1        | IMes                                                                  | trace     |
| 2        | dcype                                                                 | trace     |
| 3        | IPr                                                                   | 25        |
| <b>4</b> | <b>dppf</b>                                                           | <b>40</b> |
| 5        | PPh <sub>3</sub>                                                      | 20        |
| 6        | Phen                                                                  | trace     |
| 7        | P(4-CF <sub>3</sub> C <sub>6</sub> H <sub>4</sub> ) <sub>3</sub>      | 30        |
| <b>8</b> | <b>P(4-FC<sub>6</sub>H<sub>4</sub>)<sub>3</sub></b>                   | <b>55</b> |
| 9        | P(4-ClC <sub>6</sub> H <sub>4</sub> ) <sub>3</sub>                    | 50        |
| 10       | P(3,5-di-CF <sub>3</sub> C <sub>6</sub> H <sub>3</sub> ) <sub>3</sub> | 16        |
| 11       | P( <i>o</i> -tol) <sub>3</sub>                                        | trace     |
| 12       | PCy <sub>3</sub>                                                      | trace     |
| 13       | P( <i>n</i> -Bu) <sub>3</sub>                                         | trace     |
| 14       | P( <i>t</i> -Bu) <sub>3</sub>                                         | trace     |

**Table S3.** Ligand effect on the enantioselective carboallylation.

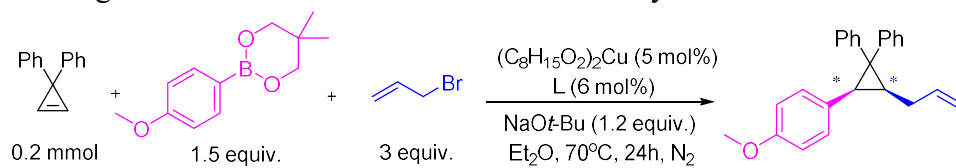

| Entry | Ligand                             | Yield/% | ee/% |
|-------|------------------------------------|---------|------|
| 1     | ( <i>R, R</i> )-DTBMSEgPhos        | 38      | – 69 |
| 2     | ( <i>R</i> )-H <sub>8</sub> -BINAP | 40      | – 65 |
| 3     | ( <i>R</i> )-MeO-Tol-BIPHEP        | 28      | – 69 |
| 4     | ( <i>R</i> )-SegPhos               | 50      | – 60 |
| 5     | ( <i>R</i> )-BINAP                 | 25      | – 66 |
| 6     | ( <i>R, R</i> )-Ph-BPE             | 11      | 88   |

## 2.3 Procedures

*Typical procedure for Cu-catalyzed biscarbonation of cyclopropenes.*

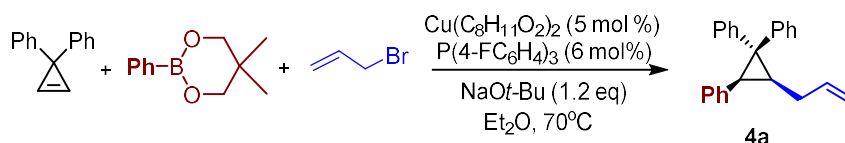

In a nitrogen filled glovebox,  $\text{Cu}(\text{C}_8\text{H}_{11}\text{O}_2)_2$  (0.01 mmol, 5 mol%) and  $\text{P}(\text{4-FC}_6\text{H}_4)_3$  (0.012 mmol, 6 mol%) were dissolved in anhydrous  $\text{Et}_2\text{O}$  (3 mL). The mixture was stirred at room temperature for ca. 2 min before  $\text{NaOt-Bu}$  (0.3 mmol, 1.5 equiv., 23 mg), boronic ester (0.30 mmol, 1.5 equiv.) and allyl bromide (0.6 mmol, 3.0 equiv.) were successively added. Then cyclopropene (0.20 mmol) was added dropwise into the solution. The resulting mixture was stirred at 70 °C for 24 h. After complete conversion, the solvent was removed *in vacuo* and residue was subjected to flash chromatography (eluent: petroleum ether/ $\text{EtOAc}$  = 200:1) to afford the title compound **4a** (46.2 mg, 75% yield) as a colorless oil.

*Catalytic enantioselective three-component arylallylation of cyclopropene:*

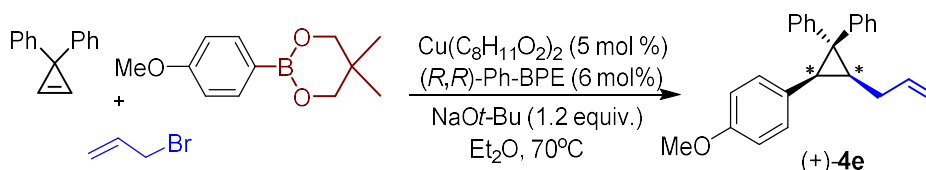

In a nitrogen filled glovebox,  $\text{Cu}(\text{C}_8\text{H}_{11}\text{O}_2)_2$  (0.01 mmol, 5 mol%) and  $(R,R)\text{-Ph-BPE}$  (0.012 mmol, 6 mol%) were dissolved in anhydrous  $\text{Et}_2\text{O}$  (3 mL) in a screw-cap tube. The mixture was stirred at room temperature for ca. 2 min before  $\text{NaOt-Bu}$  (0.3 mmol, 1.5 equiv., 23 mg), boronic ester (0.30 mmol, 1.5 equiv.) and allyl bromide (0.6 mmol, 3.0 equiv.) were successively added. Then cyclopropene (0.20 mmol) was added dropwise into the solution. The tube was sealed, taken out of the glovebox. The tube was stirred for 24 h in a 70 °C oil bath. After complete conversion, the solvent was removed *in vacuo* and residue was subjected to flash chromatography (eluent: petroleum ether/ $\text{EtOAc}$  = 200:1) to afford **(+)-4e** (7.5 mg, 11% yield, 94:6 e.r.)  $[\alpha]_{\text{D}}^{20} = 19.7$  ( $c = 0.5$ ,  $\text{CHCl}_3$ )

#### 2.4. Crystal structure of compound ( $\pm$ )-4e (CCDC# 1935679).

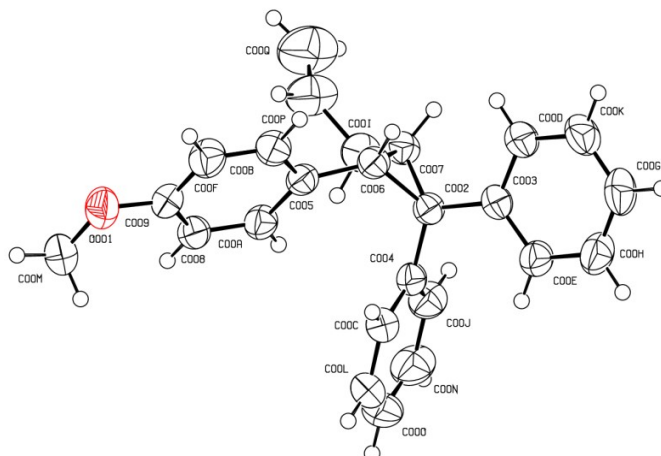

**Figure S1.** ORTEP representation of compound ( $\pm$ )-**4e**.

|                                |              |                                  |              |
|--------------------------------|--------------|----------------------------------|--------------|
| Bond precision: C-C = 0.0034 Å |              | Wavelength=1.54178               |              |
| Cell:                          | a=10.220 (2) | b=9.550 (2)                      | c=20.071 (5) |
|                                | alpha=90     | beta=93.737 (13)                 | gamma=90     |
| Temperature:                   | 273 K        |                                  |              |
|                                | Calculated   | Reported                         |              |
| Volume                         | 1954.8 (7)   | 1954.8 (8)                       |              |
| Space group                    | P 21/c       | P 1 21/c 1                       |              |
| Hall group                     | -P 2ybc      | -P 2ybc                          |              |
| Moiety formula                 | C25 H24 O    | C25 H24 O                        |              |
| Sum formula                    | C25 H24 O    | C25 H24 O                        |              |
| Mr                             | 340.44       | 338.42                           |              |
| Dx, g cm-3                     | 1.157        | 1.150                            |              |
| Z                              | 4            | 4                                |              |
| Mu (mm-1)                      | 0.525        | 0.525                            |              |
| F000                           | 728.0        | 720.0                            |              |
| F000'                          | 729.92       |                                  |              |
| h, k, lmax                     | 12, 11, 24   | 12, 11, 24                       |              |
| Nref                           | 3685         | 3594                             |              |
| Tmin, Tmax                     |              |                                  |              |
| Tmin'                          |              |                                  |              |
| Correction method= Not given   |              |                                  |              |
| Data completeness= 0.975       |              | Theta(max)= 69.671               |              |
| R(reflections)= 0.0624 ( 2969) |              | wR2(reflections)= 0.1530 ( 3594) |              |
| S = 1.081                      |              | Npar= 236                        |              |

**Figure S2.** Crystal structure parameters.



### 3. Compound Characterization

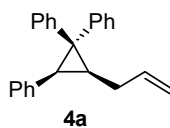

**((2S\*,3S\*)-3-Allylcyclopropane-1,1,2-triyl)tribenzene (4a):** following the general procedure, the reaction of 5,5-dimethyl-2-phenyl-1,3,2-dioxaborinane (0.30 mmol, 1.5 equiv., 57.0 mg), 3-bromoprop-1-ene (0.60 mmol, 3.0 equiv., 72.0 mg) and 3,3-diphenyl cyclopropene (0.20 mmol, 1.0 equiv., 38.4 mg) afforded **4a** (46.2 mg, 75% yield) as a colorless oil.

**<sup>1</sup>H NMR** (600 MHz, CDCl<sub>3</sub>) δ 7.28–7.24 (m, 2H), 7.19–7.13 (m, 4H), 7.13–7.09 (m, 3H), 7.08–7.03 (m, 4H), 6.77–6.72 (m, 2H), 5.79–5.71 (m, 1H), 5.06–4.99 (m, 1H), 4.93–4.89 (m, 1H), 2.74 (d, *J* = 10.2 Hz, 1H), 2.59–2.51 (m, 1H), 2.26–2.18 (m, 1H), 2.04–1.97 (m, 1H).

**<sup>13</sup>C NMR** (151 MHz, CDCl<sub>3</sub>) δ 149.07, 138.16, 137.77, 137.56, 132.01, 129.75, 128.42, 128.23, 127.57, 127.45, 126.55, 125.85, 125.37, 115.22, 40.82, 35.27, 31.79, 30.08.

**HRMS** (ESI-TOF) (*m/z*): Calcd for C<sub>24</sub>H<sub>22</sub> ([M+H]<sup>+</sup>), 311.1794; found 311.1782.

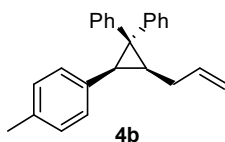

**((2S\*,3S\*)-2-Allyl-3-(p-tolyl)cyclopropane-1,1-diyl)dibenzene (4b):** following the general procedure, the reaction of 5,5-dimethyl-2-(p-tolyl)-1,3,2-dioxaborinane (0.30 mmol, 1.5 equiv., 61.2 mg), 3-bromoprop-1-ene (0.60 mmol, 3.0 equiv., 0.0720 g) and 3,3-diphenyl cyclopropene (0.20 mmol, 1.0 equiv., 38.4 mg) afforded **4b** (46.6 mg, 72% yield) as a colorless oil.

**<sup>1</sup>H NMR** (600 MHz, CDCl<sub>3</sub>) δ 7.33–7.31 (m, 2H), 7.26–7.21 (m, 4H), 7.21–7.16 (m, 3H), 7.14–7.09 (m, 1H), 6.97–6.92 (m, 2H), 6.72–6.68 (m, 2H), 5.87–5.79 (m, 1H), 5.14–5.07 (m, 1H), 5.01–4.96 (m, 1H), 2.78 (d, *J* = 10.2 Hz, 1H), 2.63–2.56 (m, 1H), 2.31–2.24 (m, 4H), 2.08–2.01 (m, 1H).

**<sup>13</sup>C NMR** (151 MHz, CDCl<sub>3</sub>) δ 149.18, 137.90, 137.69, 134.92, 134.83, 132.06, 129.63, 128.39, 128.22, 128.19, 127.55, 126.50, 125.78, 115.15, 40.52, 35.04, 31.66, 30.12, 20.91.

**HRMS** (ESI-TOF) (*m/z*): Calcd for C<sub>25</sub>H<sub>24</sub> ([M + H]<sup>+</sup>), 325.1950; found 325.1955.

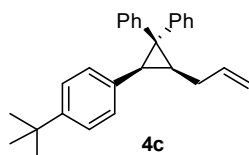

**((2S\*,3S\*)-2-Allyl-3-(4-(tert-butyl)phenyl)cyclopropane-1,1-diyl)dibenzene (4c):** following the general procedure, the reaction of 2-(4-(tert-butyl)phenyl)-5,5-dimethyl-1,3,2-dioxaborinane (0.30 mmol, 1.5 equiv., 73.8 mg), 3-bromoprop-1-ene (0.60 mmol, 3.0 equiv., 72.0 mg) and 3,3-diphenyl cyclopropene (0.20 mmol, 1.0 equiv., 38.4 mg) afforded **4c** (38.1 mg, 52% yield) as a colorless oil.

**<sup>1</sup>H NMR** (600 MHz, CDCl<sub>3</sub>) δ 7.27–7.24 (m, 2H), 7.18–7.10 (m, 7H), 7.09–7.05 (m, 2H), 7.05–7.01 (m, 1H), 5.81–5.73 (m, 1H), 5.05–5.00 (m, 1H), 4.94–4.89 (m, 1H), 2.71 (d, *J* = 9.6 Hz, 1H), 2.53–2.46 (m, 1H), 2.22–2.16 (m, 1H), 1.99–1.93 (m, 1H), 1.20 (s, 9H).

**<sup>13</sup>C NMR** (151 MHz, CDCl<sub>3</sub>) δ 149.25, 148.12, 138.00, 137.83, 134.89, 132.06, 129.40, 128.39, 128.16, 127.64, 126.45, 125.77, 124.34, 115.12, 77.21, 77.00, 76.79, 40.62, 34.83, 34.25, 31.56, 31.34, 30.24.

**HRMS** (ESI-TOF) (*m/z*): Calcd for C<sub>28</sub>H<sub>30</sub> ([M+H]<sup>+</sup>), 367.2420; found 367.2418.

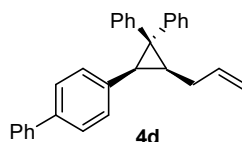

**4-((1S\*,3S\*)-3-Allyl-2,2-diphenylcyclopropyl)-1,1'-biphenyl (4d)**: following the general procedure, the reaction of 2-([1,1'-biphenyl]-4-yl)-5,5-dimethyl-1,3,2-dioxaborinane (0.30 mmol, 1.5 equiv., 79.8 mg), 3-bromoprop-1-ene (0.60 mmol, 3.0 equiv., 72.0 mg) and 3,3-diphenyl cyclopropene (0.20 mmol, 1.0 equiv., 38.4 mg) afforded **4d** (67.5 mg, 87% yield) as a colorless oil.

**<sup>1</sup>H NMR** (600 MHz, CDCl<sub>3</sub>) δ 7.59–7.55 (m, 2H), 7.43–7.37 (m, 4H), 7.37–7.33 (m, 2H), 7.32–7.28 (m, 1H), 7.26–7.23 (m, 4H), 7.23–7.20 (m, 3H), 7.16–7.12 (m, 1H), 6.90–6.86 (m, 2H), 5.90–5.82 (m, 1H), 5.16–5.10 (m, 1H), 5.03–4.99 (m, 1H), 2.855 (d, *J* = 10.2 Hz, 1H), 2.69–2.61 (m, 1H), 2.37–2.29 (m, 1H), 2.15–2.08 (m, 1H).

**<sup>13</sup>C NMR** (151 MHz, CDCl<sub>3</sub>) δ 149.02, 140.76, 138.01, 137.74, 137.56, 137.40, 132.07, 130.15, 128.69, 128.45, 128.30, 127.56, 126.99, 126.80, 126.63, 126.02, 125.89, 115.31, 41.05, 35.10, 32.03, 30.14.

**HRMS** (ESI-TOF) (*m/z*): Calcd for C<sub>30</sub>H<sub>26</sub> ([M+H]<sup>+</sup>), 387.2107; found 387.2102.

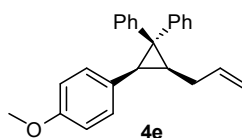

**((2S\*,3S\*)-2-Allyl-3-(4-methoxyphenyl)cyclopropane-1,1-diyl)dibenzene (4e)**: following the general procedure, the reaction of 2-(4-methoxyphenyl)-5,5-dimethyl-1,3,2-dioxaborinane (0.30 mmol, 1.5 equiv., 66.0 mg), 3-bromoprop-1-ene (0.60 mmol, 3.0 equiv., 72.0 mg) and 3,3-diphenyl cyclopropene (0.20 mmol, 1.0 equiv., 38.4 mg) afforded **4e** (61.5 mg, 91% yield) as a yellow solid. M.p. = 87 - 89°C.

**<sup>1</sup>H NMR** (600 MHz, CDCl<sub>3</sub>) δ 7.25–7.21 (m, 2H), 7.18–7.13 (m, 4H), 7.13–7.08 (m, 3H), 7.06–7.02 (m, 1H), 6.68–6.64 (m, 2H), 5.63–5.59 (m, 2H), 5.80–5.71 (m, 1H), 5.06–4.99 (m, 1H), 4.93–4.89 (m, 1H), 3.64 (s, 3H), 2.69 (d, *J* = 9.6 Hz, 1H), 2.55–2.48 (m, 1H), 2.22–2.15 (m, 1H), 1.99–1.92 (m, 1H).

**<sup>13</sup>C NMR** (151 MHz, CDCl<sub>3</sub>) δ 157.46, 149.15, 137.88, 137.65, 132.10, 130.63, 129.98, 128.38, 128.20, 127.50, 126.49, 125.75, 115.17, 112.96, 55.09, 40.14, 34.67, 31.43, 30.12.

**HRMS** (ESI-TOF) (*m/z*): Calcd for C<sub>25</sub>H<sub>24</sub>O ([M + H]<sup>+</sup>), 341.1899; found 341.1892.

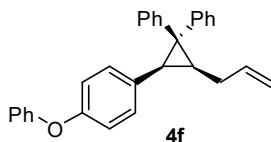

**((2S\*,3S\*)-2-Allyl-3-(4-phenoxyphenyl)cyclopropane-1,1-diyl)dibenzene (4f):** following the general procedure, the reaction of 5,5-dimethyl-2-(4-phenoxyphenyl)-1,3,2-dioxaborinane (0.30 mmol, 1.5 equiv., 84.6 mg), 3-bromoprop-1-ene (0.60 mmol, 3.0 equiv., 72.0 mg) and 3,3-diphenyl cyclopropene (0.20 mmol, 1.0 equiv., 38.4 mg) afforded **4f** (72.7 mg, 90% yield) as a colorless oil.

**<sup>1</sup>H NMR** (600 MHz, CDCl<sub>3</sub>) δ 7.34–7.28 (m, 4H), 7.27–7.21 (m, 4H), 7.21–7.16 (m, 3H), 7.15–7.10 (m, 1H), 7.09–7.04 (m, 1H), 7.00–6.96 (m, 2H), 6.82–6.76 (m, 4H), 5.90–5.80 (m, 1H), 5.14–5.07 (m, 1H), 5.04–4.98 (m, 1H), 2.81 (d, *J* = 9.6 Hz, 1H), 2.67–2.59 (m, 1H), 2.34–2.27 (m, 1H), 2.12–2.05 (m, 1H).

**<sup>13</sup>C NMR** (151 MHz, CDCl<sub>3</sub>) δ 157.38, 154.98, 149.01, 137.74, 137.53, 133.00, 132.03, 130.87, 129.63, 128.43, 128.25, 127.54, 126.59, 125.85, 123.00, 118.68, 118.00, 115.28, 40.50, 34.68, 31.59, 30.12.

**HRMS** (ESI-TOF) (*m/z*): Calcd for C<sub>30</sub>H<sub>26</sub>O ([M + H]<sup>+</sup>), 403.2056; found 403.2048.

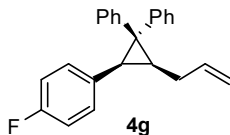

**((2S\*,3S\*)-2-Allyl-3-(4-fluorophenyl)cyclopropane-1,1-diyl)dibenzene (4g):** following the general procedure, the reaction of 2-(4-fluorophenyl)-5,5-dimethyl-1,3,2-dioxaborinane (0.30 mmol, 1.5 equiv., 62.4 mg), 3-bromoprop-1-ene (0.60 mmol, 3.0 equiv., 72.0 mg) and 3,3-diphenyl cyclopropene (0.20 mmol, 1.0 equiv., 38.4 mg) afforded **4g** (46.3 mg, 71% yield) as a yellow solid. M.p. = 79 - 81°C.

**<sup>1</sup>H NMR** (600 MHz, CDCl<sub>3</sub>) δ 7.34–7.29 (m, 2H), 7.27–7.18 (m, 5H), 7.18–7.10 (m, 3H), 6.85–6.80 (m, 2H), 6.79–6.74 (m, 2H), 5.86–5.77 (m, 1H), 5.12–5.06 (m, 1H), 2.80 (d, *J* = 10.2 Hz, 1H), 2.65–2.58 (m, 1H), 2.28–2.21 (m, 1H), 2.09–2.03 (m, 1H).

**<sup>13</sup>C NMR** (151 MHz, CDCl<sub>3</sub>) δ 161.05 (d, *J* = 242.7 Hz), 148.85, 137.55, 137.30, 133.75 (d, *J* = 3.2 Hz), 131.99, 130.95 (d, *J* = 7.5 Hz), 128.45, 128.32, 127.49, 126.67, 125.91, 115.35, 114.31 (d, *J* = 20.9 Hz), 40.53, 34.51, 31.57, 29.97.

**<sup>19</sup>F NMR** (470 MHz, CDCl<sub>3</sub>) δ –117.99 (tt, *J* = 8.9, 5.2 Hz).

**HRMS** (ESI-TOF) (*m/z*): Calcd for C<sub>24</sub>H<sub>21</sub>F ([M + H]<sup>+</sup>), 329.1700; found 329.1708.

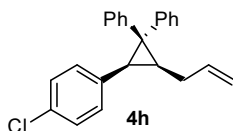

**((2S\*,3S\*)-2-Allyl-3-(4-chlorophenyl)cyclopropane-1,1-diyl)dibenzene (4h):** following the general procedure, the reaction of 2-(4-chlorophenyl)-5,5-dimethyl-1,3,2-dioxaborinane (0.30 mmol, 1.5 equiv., 67.3 mg), 3-bromoprop-1-ene (0.60 mmol, 3.0

equiv., 72.0 mg) and 3,3-diphenyl cyclopropene (0.20 mmol, 1.0 equiv., 38.4 mg) afforded **4h** (59.5 mg, 87% yield) as a colorless oil.

**<sup>1</sup>H NMR** (600 MHz, CDCl<sub>3</sub>) δ 7.32–7.30 (m, 2H), 7.27–7.18 (m, 5H), 7.18–7.14 (m, 2H), 7.14–7.11 (m, 1H), 7.01–7.08 (m, 2H), 6.75–6.69 (m, 2H), 5.85–5.75 (m, 1H), 5.12–5.06 (m, 1H), 5.02–4.98 (m, 1H), 2.78 (d, *J* = 9.6 Hz, 1H), 2.66–2.58 (m, 1H), 2.27–2.22 (m, 1H), 2.12–2.05 (m, 1H).

**<sup>13</sup>C NMR** (151 MHz, CDCl<sub>3</sub>) δ 148.70, 137.36, 137.18, 136.75, 131.93, 131.25, 130.90, 128.47, 128.39, 127.57, 127.45, 126.76, 125.98, 115.44, 34.67, 31.90, 30.32, 29.90.

**HRMS** (ESI-TOF) (*m/z*): Calcd for C<sub>24</sub>H<sub>21</sub>Cl ([M+H]<sup>+</sup>), 345.1404; found 345.1406.

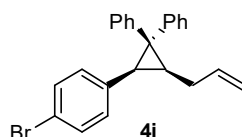

**((2S\*,3S\*)-2-Allyl-3-(4-bromophenyl)cyclopropane-1,1-diyl)dibenzene (**4i**)**: following the general procedure, the reaction of 2-(4-bromophenyl)- 5,5- dimethyl- 1,3,2-dioxaborinane (0.30 mmol, 1.5 equiv., 80.7 mg), 3-bromoprop-1-ene (0.60 mmol, 3.0 equiv., 72.0 mg) and 3,3-diphenyl cyclopropene (0.20 mmol, 1.0 equiv., 38.4 mg) afforded **4i** (63.5 mg, 82% yield) as a colorless oil.

**<sup>1</sup>H NMR** (600 MHz, CDCl<sub>3</sub>) δ 7.32–7.28 (m, 2H), 7.27–7.18 (m, 7H), 7.18–7.10 (m, 3H), 6.68–6.64 (m, 2H), 5.85–5.75 (m, 1H), 5.12–5.06 (m, 1H), 5.02–4.97 (m, 1H), 2.76 (d, *J* = 9.6 Hz, 1H), 2.66–2.57 (m, 1H), 2.26–1.90 (m, 1H), 2.12–2.05 (m, 1H).

**<sup>13</sup>C NMR** (151 MHz, CDCl<sub>3</sub>) δ 148.66, 137.30, 137.15, 131.92, 131.29, 130.50, 128.47, 128.40, 127.45, 126.77, 125.99, 119.34, 115.45, 41.02, 34.73, 31.92, 29.87.

**HRMS** (ESI-TOF) (*m/z*): Calcd for C<sub>24</sub>H<sub>21</sub>Br([M + H]<sup>+</sup>), 389.0899; found 389.0901.

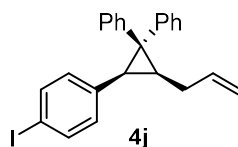

**((2S\*,3S\*)-2-Allyl-3-(4-iodophenyl)cyclopropane-1,1-diyl)dibenzene (**4j**)**: following the general procedure, the reaction of 2-(4-iodophenyl)-5,5- dimethyl- 1,3,2-dioxaborinane (0.30 mmol, 1.5 equiv., 91.1 mg), 3-bromoprop-1-ene (0.60 mmol, 3.0 equiv., 72.0 mg) and 3,3-diphenyl cyclopropene (0.20 mmol, 1.0 equiv., 38.4 mg) afforded **4j** (65.7 mg, 75% yield) as a colorless oil.

**<sup>1</sup>H NMR** (600 MHz, CDCl<sub>3</sub>) δ 7.46 – 7.41 (m, 2H), 7.32 – 7.28 (m, 2H), 7.27 – 7.18 (m, 5H), 7.18 – 7.10 (m, 3H), 6.52 – 6.51 (m, 2H), 5.84 – 5.76 (m, 1H), 5.12 – 5.06 (m, 1H), 5.02 – 4.97 (m, 1H), 2.74 (d, *J* = 9.6 Hz, 1H), 2.65 – 2.57 (m, 1H), 2.26 – 2.18 (m, 1H), 2.12 – 2.05 (m, 1H).

**<sup>13</sup>C NMR** (151 MHz, CDCl<sub>3</sub>) δ 148.66, 138.03, 137.28, 137.16, 136.45, 131.90, 131.66, 128.48, 128.42, 127.45, 126.78, 126.00, 125.51, 115.46, 34.84, 32.00, 30.32, 29.86.

**HRMS** (ESI-TOF) (*m/z*): Calcd for C<sub>24</sub>H<sub>21</sub>I ([M + H]<sup>+</sup>), 437.0760; found 437.0762.

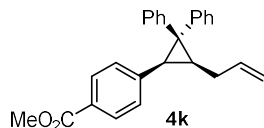

**Methyl 4-((1S\*,3S\*)-3-allyl-2,2-diphenylcyclopropyl)benzoate (4k):**

following the general procedure, the reaction of methyl 4-(5,5-dimethyl-1,3,2-dioxaborinan-2-yl)benzoate (0.30 mmol, 1.5 equiv., 74.4 mg), 3-bromoprop-1-ene (0.60 mmol, 3.0 equiv., 72.0 mg) and 3,3-diphenyl cyclopropene (0.20 mmol, 1.0 equiv., 38.4 mg) afforded **4k** (27.4 mg, 37% yield) as a white solid. M.p. = 84 - 88°C.

**<sup>1</sup>H NMR** (600 MHz, CDCl<sub>3</sub>) δ 7.81–7.78 (m, 2H), 7.34–7.31 (m, 2H), 7.27–7.20 (m, 5H), 7.18–7.12 (m, 3H), 6.88–6.85 (m, 2H), 5.83–5.75 (m, 1H), 5.11–5.06 (m, 1H), 5.00–4.98 (m, 1H), 3.87 (s, 3H), 2.86 (d, *J* = 9.6 Hz, 1H), 2.71–2.64 (m, 1H), 2.32–2.25 (m, 1H), 2.20–2.13 (m, 1H).

**<sup>13</sup>C NMR** (151 MHz, CDCl<sub>3</sub>) δ 167.16, 148.55, 144.19, 137.22, 137.04, 131.84, 129.59, 128.64, 128.51, 128.44, 127.46, 127.15, 126.84, 126.07, 115.51, 51.91, 41.98, 35.38, 32.67, 29.92.

**HRMS** (ESI-TOF) (*m/z*): Calcd for C<sub>26</sub>H<sub>24</sub>O<sub>2</sub> ([M + H]<sup>+</sup>), 369.1849; found 369.1856.

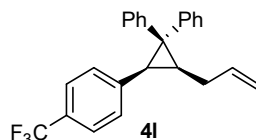

**((2S\*,3S\*)-2-Allyl-3-(4-(trifluoromethyl)phenyl)cyclopropane-1,1-diyl)dibenzene (4l):**

following the general procedure, the reaction of 5,5-dimethyl-2-(4-(trifluoromethyl)phenyl)-1,3,2-dioxaborinane (0.30 mmol, 1.5 equiv., 77.4 mg), 3-bromoprop-1-ene (0.60 mmol, 3.0 equiv., 72.0 mg) and 3,3-diphenyl cyclopropene (0.20 mmol, 1.0 equiv., 0.0384 g) afforded **4l** (29.4 mg, 39% yield) as a white solid. M.p. = 236 - 240°C.

**<sup>1</sup>H NMR** (600 MHz, CDCl<sub>3</sub>) δ 7.39 - 7.36 (m, 2H), 7.34 - 7.31 (m, 2H), 7.28 - 7.20 (m, 5H), 7.19 - 7.12 (m, 3H), 6.91 - 6.87 (m, 2H), 5.83 - 5.75 (m, 1H), 5.12 - 5.06 (m, 1H), 5.02 - 4.97 (m, 1H), 2.86 (d, *J* = 9.6 Hz, 1H), 2.70 - 2.63 (m, 1H), 2.29 - 2.21 (m, 1H), 2.18 - 2.12 (m, 1H).

**<sup>13</sup>C NMR** (151 MHz, CDCl<sub>3</sub>) δ 148.49, 142.68, 137.15, 136.97, 131.84, 129.80, 128.54, 128.50, 127.52 (q, *J* = 32.5 Hz), 127.48, 126.91, 126.12, 124.38 (q, <sup>1</sup>*J*<sub>C-F</sub> = 271.8 Hz), 124.25 (q, <sup>1</sup>*J*<sub>C-F</sub> = 4.5 Hz), 115.57, 41.75, 34.98, 32.40, 29.84.

**<sup>19</sup>F NMR** (470 MHz, CDCl<sub>3</sub>) δ - 62.22 (s).

**HRMS** (ESI-TOF) (*m/z*): Calcd for C<sub>25</sub>H<sub>21</sub>F<sub>3</sub>Na ([M + Na]<sup>+</sup>), 401.1481; found 401.1488.

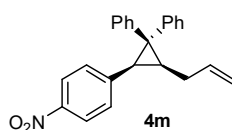

**((2S\*,3S\*)-2-Allyl-3-(4-nitrophenyl)cyclopropane-1,1-diyl)dibenzene (4m):** following the general procedure, the reaction of 5,5-dimethyl-2-(4-nitrophenyl)-1,3,2-dioxaborinane (0.30 mmol, 1.5 equiv., 70.5 mg), 3-bromoprop-1-ene (0.60 mmol, 3.0 equiv., 72.0 mg) and 3,3-diphenylcyclopropene (0.20 mmol, 1.0 equiv., 38.4 mg) afforded **4m** (30.8 mg, 43% yield) as a colorless oil.

**<sup>1</sup>H NMR** (600 MHz, CDCl<sub>3</sub>) δ 7.93 – 7.89 (m, 2H), 7.27 – 7.24 (m, 2H), 7.22 – 7.17 (m, 5H), 7.12 – 7.07 (m, 3H), 6.87 – 6.83 (m, 2H), 5.76 – 5.66 (m, 1H), 5.04 – 4.98 (m, 1H), 4.95 – 4.90 (m, 1H), 2.87 – 2.82 (m, 1H), 2.69 – 2.60 (m, 1H), 2.23 – 2.14 (m, 2H).

**<sup>13</sup>C NMR** (151 MHz, CDCl<sub>3</sub>) δ 148.03, 146.95, 145.71, 136.71, 136.52, 131.69, 130.07, 128.68, 128.62, 127.39, 127.17, 126.33, 122.57, 115.82, 42.86, 35.25, 33.25, 29.72.

**HRMS** (ESI-TOF) (*m/z*): Calcd for C<sub>24</sub>H<sub>21</sub>NO<sub>2</sub> ([M + H]<sup>+</sup>), 356.1645; found 356.1641.

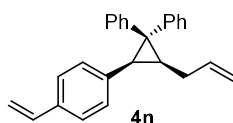

**((2S\*,3S\*)-2-Allyl-3-(4-vinylphenyl)cyclopropane-1,1-diyl)dibenzene (4n):** following the general procedure, the reaction of 5,5-dimethyl-2-(4-vinylphenyl)-1,3,2-dioxaborinane (0.30 mmol, 1.5 equiv., 64.8 mg), 3-bromoprop-1-ene (0.60 mmol, 3.0 equiv., 72.0 mg) and 3,3-diphenylcyclopropene (0.20 mmol, 1.0 equiv., 38.4 mg) afforded **4n** (45.4 mg, 68% yield) as a colorless oil.

**<sup>1</sup>H NMR** (600 MHz, CDCl<sub>3</sub>) δ 7.26–7.23 (m, 2H), 7.20–7.15 (m, 5H), 7.13–7.10 (m, 4H), 7.07–7.03 (m, 1H), 6.71–6.68 (m, 2H), 6.61–6.54 (m, 1H), 5.79–5.71 (m, 1H), 5.63–5.58 (m, 1H), 5.12–5.08 (m, 1H), 5.06–5.00 (m, 1H), 4.94–4.90 (m, 1H), 2.73 (d, *J* = 9.6 Hz, 1H), 2.59 – 2.52 (m, 1H), 2.24–2.17 (m, 1H), 2.05–1.98 (m, 1H).

**<sup>13</sup>C NMR** (151 MHz, CDCl<sub>3</sub>) δ 148.96, 137.99, 137.66, 137.49, 136.54, 134.65, 132.01, 129.85, 128.43, 128.28, 127.50, 126.62, 125.87, 125.31, 115.28, 112.91, 41.04, 35.24, 32.07, 30.08.

**HRMS** (ESI-TOF) (*m/z*): Calcd for C<sub>26</sub>H<sub>24</sub> ([M + H]<sup>+</sup>), 337.1950; found 337.1952.

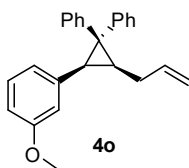

**((2S\*,3S\*)-2-Allyl-3-(3-methoxyphenyl)cyclopropane-1,1-diyl)dibenzene (4o):** following the general procedure, the reaction of 2-(3-methoxyphenyl)-5,5-dimethyl-1,3,2-dioxaborinane (0.30 mmol, 1.5 equiv., 66.0 mg), 3-bromoprop-1-ene (0.60 mmol, 3.0 equiv., 72.0 mg) and 3,3-diphenylcyclopropene (0.20 mmol, 1.0 equiv., 38.4 mg) afforded **4o** (40.9 mg, 60% yield) as a colorless oil.

**<sup>1</sup>H NMR** (600 MHz, CDCl<sub>3</sub>) δ 7.28–7.24 (m, 2H), 7.19–7.09 (m, 7H), 7.07–7.03 (m, 1H), 7.01–6.96 (m, 1H), 6.30–6.59 (m, 1H), 6.45–6.41 (m, 1H), 6.23–6.20 (m, 1H), 5.81–5.72 (m, 1H), 5.07–5.01 (m, 1H), 4.95–4.90 (m, 1H), 3.49 (s, 3H), 2.72 (d, *J* = 10.2 Hz, 1H), 2.59–2.52

(m, 1H), 2.26–2.19 (m, 1H), 2.02–1.96 (m, 1H).

**<sup>13</sup>C NMR** (151 MHz, CDCl<sub>3</sub>) δ 158.72, 149.02, 139.75, 137.83, 137.55, 131.99, 128.43, 128.30, 128.25, 127.59, 126.57, 125.88, 122.54, 115.25, 115.02, 111.33, 54.84, 40.94, 35.11, 31.90, 30.18.

**HRMS** (ESI-TOF) (*m/z*): Calcd for C<sub>25</sub>H<sub>24</sub>O ([M + H]<sup>+</sup>), 341.1899; found 341.1893.

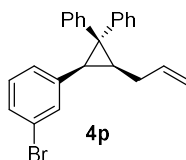

**((2S\*,3S\*)-2-Allyl-3-(3-bromophenyl)cyclopropane-1,1-diyl)dibenzene (4p)**: following the general procedure, the reaction of 2-(3-bromophenyl)-5,5-dimethyl-1,3,2-dioxaborinane (0.30 mmol, 1.5 equiv., 80.4 mg), 3-bromoprop-1-ene (0.60 mmol, 3.0 equiv., 72.0 mg) and 3,3-diphenyl cyclopropene (0.20 mmol, 1.0 equiv., 38.4 mg) afforded **4p** (38.9 mg, 50% yield) as a colorless oil.

**<sup>1</sup>H NMR** (600 MHz, CDCl<sub>3</sub>) δ 7.34–7.30 (m, 2H), 7.27–7.19 (m, 6H), 7.18–7.11 (m, 3H), 7.07–7.05 (m, 1H), 6.92 (t, *J* = 7.8 Hz, 1H), 6.63–6.60 (m, 1H), 5.86–5.78 (m, 1H), 5.13–5.07 (m, 1H), 5.03–4.99 (m, 1H), 2.75 (d, *J* = 9.6 Hz, 1H), 2.66–2.59 (m, 1H), 2.28–2.21 (m, 1H), 2.12–2.07 (m, 1H).

**<sup>13</sup>C NMR** (151 MHz, CDCl<sub>3</sub>) δ 148.58, 140.75, 137.23, 137.15, 132.85, 131.85, 128.81, 128.50, 128.42, 128.37, 127.96, 127.50, 126.82, 126.04, 121.60, 115.50, 41.28, 34.74, 32.05, 29.89.

**HRMS** (ESI-TOF) (*m/z*): Calcd for C<sub>24</sub>H<sub>21</sub>Br ([M + H]<sup>+</sup>), 389.0899; found 389.0902.

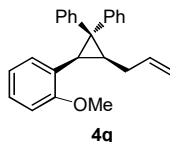

**((2S\*,3S\*)-2-Allyl-3-(2-methoxyphenyl)cyclopropane-1,1-diyl)dibenzene (4q)**: following the general procedure, the reaction of 2-(2-methoxyphenyl)-5,5-dimethyl-1,3,2-dioxaborinane (0.30 mmol, 1.5 equiv., 66.0 mg), 3-bromoprop-1-ene (0.60 mmol, 3.0 equiv., 72.0 mg) and 3,3-diphenyl cyclopropene (0.20 mmol, 1.0 equiv., 38.4 mg) afforded **4q** (10.9 mg, 16% yield) as a colorless oil.

**<sup>1</sup>H NMR** (600 MHz, CDCl<sub>3</sub>) δ 7.48 (d, *J* = 7.8 Hz, 2H), 7.29–7.26 (m, 2H), 7.17–7.08 (m, 7H), 6.91 (d, *J* = 7.8 Hz, 1H), 6.66 (t, *J* = 7.8 Hz, 1H), 6.60 (d, *J* = 7.2 Hz, 1H), 5.99–5.91 (m, 1H), 5.19–5.04 (m, 2H), 3.91 (s, 3H), 3.15 (d, *J* = 9.6 Hz, 1H), 2.64–2.54 (m, 1H), 2.43–2.35 (m, 1H), 2.13–2.06 (m, 1H). **<sup>13</sup>C NMR** (150 MHz, CDCl<sub>3</sub>) δ 159.15, 149.51, 139.27, 138.01, 131.32, 128.81, 128.28, 127.93, 127.06, 126.56, 126.06, 125.74, 119.63, 115.22, 110.04, 77.21, 77.00, 76.79, 55.53, 39.66, 30.82, 30.27, 27.59. **HRMS** (ESI-TOF) (*m/z*): Calcd for C<sub>25</sub>H<sub>25</sub>O ([M + H]<sup>+</sup>), 341.1900; found 341.1904.

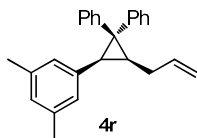

**((2S\*,3S\*)-2-Allyl-3-(3,5-dimethylphenyl)cyclopropane-1,1-diyl)dibenzene (4r):**

following the general procedure, the reaction of 2-(3,5-dimethylphenyl)-5,5-dimethyl-1,3,2-dioxaborinane (0.30 mmol, 1.5 equiv., 65.0 mg), 3-bromoprop-1-ene (0.60 mmol, 3.0 equiv., 72.0 mg) and 3,3-diphenyl cyclopropene (0.20 mmol, 1.0 equiv., 83.4 mg) afforded **4r** (39.2 mg, 58% yield) as a colorless oil.

**<sup>1</sup>H NMR** (600 MHz, CDCl<sub>3</sub>) δ 7.27–7.24 (m, 2H), 7.18–7.13 (m, 4H), 7.13–7.09 (m, 3H), 7.06–7.03 (m, 1H), 6.70 (s, 1H), 6.34 (s, 2H), 5.82–5.74 (m, 1H), 5.07–5.01 (m, 1H), 4.95–4.91 (m, 1H), 2.66 (d, *J* = 9.6 Hz, 1H), 2.54–2.47 (m, 1H), 2.25–2.17 (m, 1H), 2.08 (s, 6H), 2.00–1.93 (m, 1H).

**<sup>13</sup>C NMR** (151 MHz, CDCl<sub>3</sub>) δ 149.24, 137.99, 137.97, 137.88, 136.71, 132.10, 128.44, 128.09, 127.85, 127.66, 127.07, 126.50, 125.83, 115.19, 40.72, 35.24, 31.82, 30.24, 21.40.

**HRMS** (ESI-TOF) (*m/z*): Calcd for C<sub>26</sub>H<sub>26</sub> ([M + H]<sup>+</sup>), 339.2107; found 339.2105.

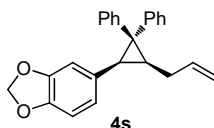

**5-((1S\*,3S\*)-3-Allyl-2,2-diphenylcyclopropyl)benzo[d][1,3]dioxole (4s):** following the general procedure, the reaction of 2-(benzo[d][1,3]dioxol-5-yl)-5,5-dimethyl-1,3,2-dioxaborinane (0.30 mmol, 1.5 equiv., 70.2 mg), 3-bromoprop-1-ene (0.60 mmol, 3.0 equiv., 72.0 mg) and 3,3-diphenylcyclopropene (0.20 mmol, 1.0 equiv., 38.4 mg) afforded **4s** (28.4 mg, 40% yield) as a colorless oil.

**<sup>1</sup>H NMR** (600 MHz, CDCl<sub>3</sub>) δ 7.25–7.22 (m, 2H), 7.19–7.14 (m, 4H), 7.14–7.09 (m, 3H), 7.07–7.03 (m, 1H), 6.56 (d, *J* = 7.8 Hz, 1H), 6.37–6.34 (m, 1H), 6.16–6.14 (m, 1H), 5.82–5.79 (m, 2H), 5.79–5.73 (m, 1H), 5.07–5.02 (m, 1H), 4.96–4.92 (m, 1H), 2.68 (d, *J* = 9.6 Hz, 1H), 2.55–2.48 (m, 1H), 2.23–2.15 (m, 1H), 1.98–1.91 (m, 1H).

**<sup>13</sup>C NMR** (151 MHz, CDCl<sub>3</sub>) δ 149.06, 146.85, 145.34, 137.75, 137.55, 131.96, 131.82, 128.41, 128.25, 127.54, 126.61, 125.83, 123.07, 115.25, 109.94, 107.55, 100.71, 40.34, 35.07, 31.43, 30.11.

**HRMS** (ESI-TOF) (*m/z*): Calcd for C<sub>25</sub>H<sub>22</sub>O<sub>2</sub> ([M + H]<sup>+</sup>), 355.1692; found 355.1699.

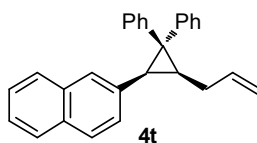

**2-((1S\*,3S\*)-3-Allyl-2,2-diphenylcyclopropyl)naphthalene (4t):** following the general procedure, the reaction of 5,5-dimethyl-2-(naphthalen-2-yl)-1,3,2-dioxaborinane (0.30



mmol, 1.5 equiv., 72.0 mg), 3-bromoprop-1-ene (0.60 mmol, 3.0 equiv., 72.0 mg) and 3,3-diphenyl cyclopropene (0.20 mmol, 1.0 equiv., 38.4 mg) afforded **4t** (49.4 mg, 69% yield) as a colorless oil.

**<sup>1</sup>H NMR** (600 MHz, CDCl<sub>3</sub>) δ 7.69–7.64 (m, 1H), 7.54–7.50 (m, 1H), 7.50–7.46 (m, 1H), 7.32–7.27 (m, 4H), 7.21–7.16 (m, 3H), 7.15–7.11 (m, 5H), 7.08–7.04 (m, 1H), 6.92–6.88 (m, 1H), 5.79–5.70 (m, 1H), 5.06–5.00 (m, 1H), 4.91–4.87 (m, 1H), 2.90 (d, *J* = 9.6 Hz, 1H), 2.67–2.59 (m, 1H), 2.34–2.27 (m, 1H), 2.12–2.05 (m, 1H).

**<sup>13</sup>C NMR** (151 MHz, CDCl<sub>3</sub>) δ 148.99, 137.77, 137.51, 135.86, 132.99, 132.06, 131.56, 128.60, 128.46, 128.28, 128.12, 127.58, 127.57, 127.35, 126.63, 125.91, 125.71, 125.13, 115.31, 41.08, 35.52, 32.22, 30.22.

**HRMS** (ESI-TOF) (*m/z*): Calcd for C<sub>28</sub>H<sub>24</sub> ([M + H]<sup>+</sup>), 361.1950; found 361.1948.

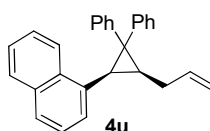

**1-((1S\*,3S\*)-3-Allyl-2,2-diphenylcyclopropyl)naphthalene (**4u**)**: following the general procedure, the reaction of 5,5-dimethyl-2-(naphthalen-1-yl)-1,3,2-dioxaborinane (0.30 mmol, 1.5 equiv., 72.0 mg), 3-bromoprop-1-ene (0.60 mmol, 3.0 equiv., 72.0 mg) and 3,3-diphenyl cyclopropene (0.20 mmol, 1.0 equiv., 38.4 mg) afforded **4u** (12.3 mg, 17% yield) as a colorless oil.

**<sup>1</sup>H NMR** (600 MHz, CDCl<sub>3</sub>) δ 8.22–8.18 (m, 1H), 7.89–7.85 (m, 1H), 7.71–7.67 (m, 1H), 7.52–7.47 (m, 2H), 7.37–7.30 (m, 4H), 7.24–7.18 (m, 2H), 7.14–7.10 (m, 1H), 7.09–7.01 (m, 3H), 6.96–6.92 (m, 2H), 6.07–5.98 (m, 1H), 5.25–5.20 (m, 1H), 5.12–5.08 (m, 1H), 3.23–3.19 (m, 1H), 2.59–2.52 (m, 1H), 2.51–2.43 (m, 2H).

**<sup>13</sup>C NMR** (151 MHz, CDCl<sub>3</sub>) δ 148.62, 138.84, 137.97, 134.61, 134.42, 133.62, 131.64, 128.82, 128.51, 127.85, 127.31, 126.66, 126.20, 126.14, 125.81, 125.49, 125.08, 124.69, 115.60, 39.30, 33.36, 31.60, 30.19.

**HRMS** (ESI-TOF) (*m/z*): Calcd for C<sub>28</sub>H<sub>24</sub> ([M + H]<sup>+</sup>), 361.1950; found 361.1958.

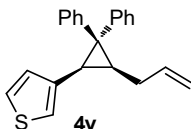

**3-((1R\*,3S\*)-3-Allyl-2,2-diphenylcyclopropyl)thiophene (**4v**)**: following the general procedure, the reaction of 5,5-dimethyl-2-(thiophen-3-yl)-1,3,2-dioxaborinane (0.30 mmol, 1.5 equiv., 58.8 mg), 3-bromoprop-1-ene (0.60 mmol, 3.0 equiv., 72.0 mg) and 3,3-diphenyl cyclopropene (0.20 mmol, 1.0 equiv., 38.4 mg) afforded **4v** (11.2 mg, 18% yield) as a white solid. M.p. 54–56 °C.

**<sup>1</sup>H NMR** (600 MHz, CDCl<sub>3</sub>) δ 7.23 – 7.20 (m, 2H), 7.19 – 7.16 (m, 4H), 7.15 – 7.13 (m, 3H), 7.07 – 7.03 (m, 2H), 6.55 (dd, *J* = 4.8, 1.2 Hz, 1H), 6.34 (dd, *J* = 3.0, 1.2 Hz, 1H), 5.74 (dddd, *J* = 17.1, 10.3, 6.7, 5.4 Hz, 1H), 5.01 (dq, *J* = 17.2, 1.7 Hz, 1H), 4.94 – 4.90 (m, 1H), 2.90 (d,

$J = 9.6$  Hz, 1H), 2.51 (dt,  $J = 16.1, 6.8, 1.4$  Hz, 1H), 2.13 (dddt,  $J = 15.2, 7.3, 5.4, 1.7$  Hz, 1H), 1.96 – 1.91 (m, 1H).

$^{13}\text{C}$  NMR (151 MHz,  $\text{CDCl}_3$ )  $\delta$  148.62, 138.00, 137.97, 137.44, 132.08, 129.97, 128.40, 128.21, 127.37, 126.65, 125.84, 123.50, 120.92, 115.20, 40.22, 31.30, 31.15, 30.74.

HRMS (ESI-TOF) ( $m/z$ ): Calcd for  $\text{C}_{22}\text{H}_{20}\text{S}$  ( $[\text{M} + \text{H}]^+$ ), 317.1358; found 317.1350.

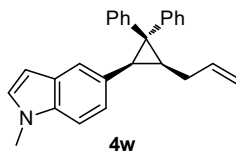

**5-((1S\*, 3S\*)-3-Allyl-2,2-diphenylcyclopropyl)-1-methyl-1H-indole (4w):** following the general procedure, the reaction of 5-(5,5-dimethyl-1,3,2-dioxaborinan-2-yl)-1-methyl-1H-indole (0.30 mmol, 1.5 equiv., 72.9 mg), 3-bromoprop-1-ene (0.60 mmol, 3.0 equiv., 72.0 mg) and 3,3-diphenyl cyclopropene (0.20 mmol, 1.0 equiv., 38.4 mg) afforded **4w** (43.2 mg, 60% yield) as a colorless oil.

$^1\text{H}$  NMR (600 MHz,  $\text{CDCl}_3$ )  $\delta$  7.29–7.25 (m, 2H), 7.17–7.13 (m, 2H), 7.12–7.06 (m, 5H), 7.05–6.98 (m, 3H), 6.86–6.84 (m, 1H), 6.68–6.64 (m, 1H), 6.22–6.19 (m, 1H), 5.81–5.72 (m, 1H), 5.05–5.01 (m, 1H), 4.91–4.85 (m, 1H), 3.59 (s, 3H), 2.85 (d,  $J = 10.2$  Hz, 1H), 2.59–2.51 (m, 1H), 2.34–2.26 (m, 1H), 2.03–1.95 (m, 1H).

$^{13}\text{C}$  NMR (151 MHz,  $\text{CDCl}_3$ )  $\delta$  149.55, 138.31, 138.01, 135.07, 132.16, 128.66, 128.45, 128.34, 128.04, 127.65, 126.27, 125.63, 124.12, 121.63, 115.00, 108.13, 100.61, 40.00, 35.69, 32.71, 31.47, 30.35.

HRMS (ESI-TOF) ( $m/z$ ): Calcd for  $\text{C}_{27}\text{H}_{25}\text{N}$  ( $[\text{M} + \text{H}]^+$ ), 364.2059; found 364.2052.

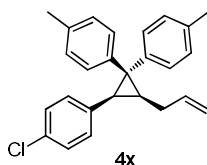

**4,4'-((2S\*, 3S\*)-2-Allyl-3-(4-chlorophenyl)cyclopropane-1,1-diyl)bis(methylbenzene) (4x):** following the general procedure, the reaction of 2-(4-chlorophenyl)-5,5-dimethyl-1,3,2-dioxaborinane (0.20 mmol, 1.0 equiv., 44.8 mg), 3-bromoprop-1-ene (0.60 mmol, 3.0 equiv., 72.0 mg) and 4,4'-(cycloprop-2-ene-1,1-diyl)bis(methylbenzene) (0.30 mmol, 1.5 equiv., 66.0 mg) afforded **4x** (37.6 mg, 50% yield) as a colorless oil.

$^1\text{H}$  NMR (600 MHz,  $\text{CDCl}_3$ )  $\delta$  7.20–7.16 (m, 2H), 7.11–7.08 (m, 2H), 7.06–7.01 (m, 6H), 6.76–6.72 (m, 2H), 5.8–5.75 (m, 1H), 5.11–5.05 (m, 1H), 5.00–4.95 (m, 1H), 2.71 (d,  $J = 9.6$  Hz, 1H), 2.64–2.56 (m, 1H), 2.31–2.25 (m, 6H), 2.25–2.18 (m, 1H), 2.07–2.01 (m, 1H).

$^{13}\text{C}$  NMR (151 MHz,  $\text{CDCl}_3$ )  $\delta$  146.11, 137.33, 136.99, 136.21, 135.47, 134.42, 131.67, 131.09, 130.90, 129.12, 127.50, 127.24, 115.30, 40.28, 34.64, 31.80, 29.90, 21.11, 20.88.

HRMS (ESI-TOF) ( $m/z$ ): Calcd for  $\text{C}_{26}\text{H}_{26}\text{Cl}$  ( $[\text{M} + \text{H}]^+$ ), 373.1718; found 373.1719.

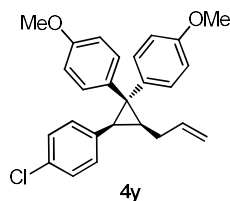

**4,4'-((2S\*,3S\*)-2-Allyl-3-(4-chlorophenyl)cyclopropane-1,1-diyl)bis(methoxybenzene)**

**(4y):** following the general procedure, the reaction of 2-(4-chlorophenyl)-5,5-dimethyl-1,3,2-dioxaborinane (0.20 mmol, 1.0 equiv., 44.8 mg), 3-bromoprop-1-ene (0.60 mmol, 3.0 equiv., 72.0 mg) and 4,4'-(cycloprop-2-ene-1,1-diyl) bis (methoxybenzene) (0.30 mmol, 1.5 equiv., 75.6 mg) afforded **4y** (46.5 mg, 58% yield) as a yellow solid. M.p. 38–40 °C.

**<sup>1</sup>H NMR** (600 MHz, CDCl<sub>3</sub>) δ 7.22–7.18 (m, 2H), 7.12–7.08 (m, 2H), 7.06–7.03 (m, 2H), 6.80–6.76 (m, 4H), 6.75–6.72 (m, 2H), 5.84–5.76 (m, 1H), 5.11–5.06 (m, 1H), 5.01–4.97 (m, 1H), 3.77 (s, 3H), 3.74 (s, 3H), 2.69 (d, *J* = 9.6 Hz, 1H), 2.61–2.54 (m, 1H), 2.25–2.18 (m, 1H), 2.04–1.99 (m, 1H).

**<sup>13</sup>C NMR** (151 MHz, CDCl<sub>3</sub>) δ 146.13, 137.34, 137.01, 136.22, 135.48, 134.45, 131.69, 131.11, 130.91, 129.13, 127.51, 127.25, 115.31, 40.29, 34.66, 31.82, 29.91, 21.11, 20.88.

**HRMS** (ESI-TOF) (*m/z*): Calcd for C<sub>26</sub>H<sub>26</sub>ClO<sub>2</sub> ([M + H]<sup>+</sup>), 405.1616; found 405.1625.

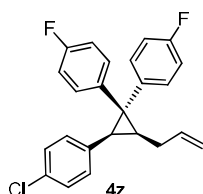

**4,4'-((2S\*,3S\*)-2-Allyl-3-(4-chlorophenyl)cyclopropane-1,1-diyl)bis(fluorobenzene) (4z):**

following the general procedure, the reaction of 2-(4-chlorophenyl)-5,5-dimethyl-1,3,2-dioxaborinane (0.30 mmol, 1.5 equiv., 67.3 mg), 3-bromoprop-1-ene (0.60 mmol, 3.0 equiv., 72.0 mg) and 4,4'-(cycloprop-2-ene-1,1-diyl)bis(fluorobenzene) (0.20 mmol, 1.0 equiv., 45.6 mg) afforded **4z** (57 mg, 75% yield) as a colorless oil.

**<sup>1</sup>H NMR** (600 MHz, CDCl<sub>3</sub>) δ 7.26 – 7.22 (m, 2H), 7.14 – 7.07 (m, 4H), 6.97 – 6.90 (m, 4H), 6.75 – 6.70 (m, 2H), 5.85 – 5.76 (m, 1H), 5.13 – 5.07 (m, 1H), 5.05 – 4.99 (m, 1H), 2.72 (d, *J* = 9.6 Hz, 1H), 2.61 – 2.52 (m, 1H), 2.28 – 2.20 (m, 1H), 2.07 – 2.01 (m, 1H).

**<sup>13</sup>C NMR** (151 MHz, CDCl<sub>3</sub>) δ 161.69 (d, *J* = 245.0 Hz), 161.11 (d, *J* = 243.6 Hz), 144.30 (d, *J* = 3.0 Hz), 136.91, 136.24, 133.30 (d, *J* = 7.8 Hz), 133.14 (d, *J* = 3.5 Hz), 131.55, 130.80, 128.94 (d, *J* = 8.0 Hz), 127.76, 115.56 (d, *J* = 29.3 Hz), 115.47 (d, *J* = 28.2 Hz), 115.24, 39.51, 34.67, 31.89, 29.78.

**<sup>19</sup>F NMR** (470 MHz, CDCl<sub>3</sub>) δ – 115.07 (tt, *J* = 8.5, 5.6 Hz, 1F), – 116.66 (tt, *J* = 8.5, 5.2 Hz, 1F).

**HRMS** (ESI-TOF) (*m/z*): Calcd for C<sub>24</sub>H<sub>19</sub>ClF<sub>2</sub> ([M + H]<sup>+</sup>), 381.1216; found 381.1208.

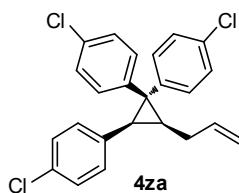

**4,4',4''-((2S\*,3S\*)-3-Allylcyclopropane-1,1,2-triyl)tris(chlorobenzene) (4za):** following the general procedure, the reaction of 2-(4-chlorophenyl)-5,5-dimethyl-1,3,2-dioxaborinane (0.30 mmol, 1.5 equiv., 67.3 mg), 3-bromoprop-1-ene (0.60 mmol, 3.0 equiv., 72.0 mg) and 4,4'-(cycloprop-2-ene-1,1-diyl)bis(chlorobenzene) (0.20 mmol, 1.0 equiv., 52.0 mg) afforded **4za** (55.4 mg, 67% yield) as a yellow solid. M.p. 98-100 °C.

**<sup>1</sup>H NMR** (600 MHz, CDCl<sub>3</sub>) δ 7.25–7.18 (m, 6H), 7.15–7.11 (m, 2H), 7.07–7.03 (m, 2H), 6.75–6.72 (m, 2H), 5.84–5.76 (m, 1H), 5.12–5.07 (m, 1H), 5.04–5.00 (m, 1H), 2.72 (d, *J* = 10.2 Hz, 1H), 2.59–2.52 (m, 1H), 2.27–2.21 (m, 1H), 2.08–2.03 (m, 1H).

**<sup>13</sup>C NMR** (151 MHz, CDCl<sub>3</sub>) δ 146.60, 136.75, 135.92, 135.57, 133.12, 133.01, 131.98, 131.69, 130.80, 128.81, 128.76, 128.69, 127.84, 115.81, 39.62, 34.77, 31.82, 29.74.

**HRMS** (ESI-TOF) (*m/z*): Calcd for C<sub>24</sub>H<sub>19</sub>Cl<sub>3</sub> ([*M* + *H*]<sup>+</sup>), 413.0625; found 413.0620.

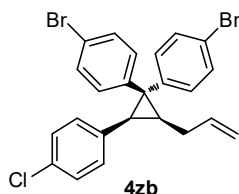

**4,4'-((2S\*,3S\*)-2-Allyl-3-(4-chlorophenyl)cyclopropane-1,1-diyl)bis(bromobenzene) (4zb):** following the general procedure, the reaction of 2-(4-chlorophenyl)-5,5-dimethyl-1,3,2-dioxaborinane (0.30 mmol, 1.5 equiv., 67.3 mg), 3-bromoprop-1-ene (0.60 mmol, 3.0 equiv., 72.0 mg) and 4,4'-(cycloprop-2-ene-1,1-diyl)bis(bromobenzene) (0.20 mmol, 1.0 equiv., 69.5 mg) afforded **4zb** (79 mg, 79% yield) as a colorless oil.

**<sup>1</sup>H NMR** (600 MHz, CDCl<sub>3</sub>) δ 7.40–7.34 (m, 4H), 7.15–7.11 (m, 4H), 7.01–6.96 (m, 2H), 6.76–6.72 (m, 2H), 5.84–5.75 (m, 1H), 5.12–5.06 (m, 1H), 5.05–5.00 (m, 1H), 2.72 (d, *J* = 9.6 Hz, 1H), 2.58–2.51 (m, 1H), 2.28–2.20 (m, 1H), 2.08–2.02 (m, 1H).

**<sup>13</sup>C NMR** (151 MHz, CDCl<sub>3</sub>) δ 147.02, 136.70, 136.00, 135.85, 133.48, 131.77, 131.71, 131.64, 130.79, 129.14, 127.85, 121.23, 120.04, 115.83, 39.74, 34.73, 31.74, 29.72.

**HRMS** (ESI-TOF) (*m/z*): Calcd for C<sub>24</sub>H<sub>19</sub>Br<sub>2</sub>Cl ([*M* + *H*]<sup>+</sup>), 500.9614; found 500.9606.

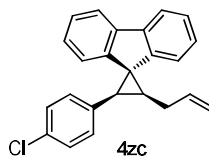

**(2S\*,3S\*)-2-Allyl-3-(4-chlorophenyl)spiro[cyclopropane-1,9'-fluorene] (4zc):** following the general procedure, the reaction of 2-(4-chlorophenyl)-5,5-dimethyl-1,3,2-dioxaborinane (0.30 mmol, 1.5 equiv., 67.3 mg), 3-bromoprop-1-ene (0.60 mmol, 3.0 equiv., 72.0 mg) and spiro[cyclopropane-1,9'-fluorene]-2-ene (0.20 mmol, 1.0 equiv., 38.0 mg) afforded **4zc** (44.7 mg, 65% yield) as a white solid. M.p. 45-47°C.

**<sup>1</sup>H NMR** (600 MHz, CDCl<sub>3</sub>) δ 7.89–7.83 (m, 2H), 7.41–7.30 (m, 3H), 7.26–7.21 (m, 2H), 7.16–7.12 (m, 1H), 7.05–6.97 (m, 3H), 6.25 (d, *J* = 7.8 Hz, 1H), 5.70–5.61 (m, 1H), 4.94–4.89 (m, 1H), 4.89–4.85 (m, 1H), 3.42 (d, *J* = 8.4 Hz, 1H), 2.70–2.62 (m, 1H), 2.38–2.31 (m, 2H).

**<sup>13</sup>C NMR** (151 MHz, CDCl<sub>3</sub>) δ 148.82, 141.44, 141.41, 139.12, 136.57, 132.82, 132.77, 132.73, 128.35, 127.01, 126.07, 125.90, 125.53, 125.09, 119.93, 119.63, 118.37, 115.52, 37.74, 35.87, 33.60, 29.51.

**HRMS** (ESI-TOF) (*m/z*): Calcd for C<sub>24</sub>H<sub>19</sub>Cl ([M + H]<sup>+</sup>), 343.1248; found 343.1256.

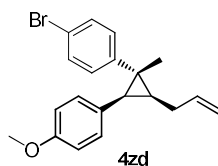

**1-((1S\*,2R\*,3S\*)-3-allyl-2-(4-bromophenyl)-2-methylcyclopropyl)-4-methoxybenzene**

**(4zd):** following the general procedure, the reaction of 2-(4-methoxyphenyl)-5,5-dimethyl-1,3,2-dioxaborinane (0.30 mmol, 1.5 equiv., 66.6 mg), 3-bromoprop-1-ene (0.60 mmol, 3.0 equiv., 72.0 mg) and 1-bromo-4-(1-methylcycloprop-2-en-1-yl)benzene (0.20 mmol, 1.0 equiv., 41.5 mg) afforded **4zd** (28.5 mg, 40% yield, 84:16 d.r.) as a colorless oil.

**<sup>1</sup>H NMR** (600 MHz, CDCl<sub>3</sub>) δ 7.46–7.41 (m, 2H), 7.40–7.37 (0.48H, ArH of the minor isomer), 7.28–7.23 (m, 2H), 7.22–7.17 (m, 2H), 7.01–6.97 (m, 0.44H, ArH of the minor isomer), 6.91–6.84 (m, 2H), 6.68–6.63 (m, 0.38H), 6.62–6.58 (m, 0.36H, ArH of the minor isomer), 6.00 (ddt, *J* = 17.4, 10.8, 6.0 Hz, 1H), 5.71 (ddt, *J* = 17.4, 10.8, 6.0 Hz, 0.19H, C=CH of the minor isomer), 5.18–5.10 (m, 1H), 5.10–5.05 (m, 1H), 5.04–4.99 (m, 0.23H, C=CH of the minor isomer), 4.96–4.91 (m, 0.19H, C=CH of the minor isomer), 3.80 (s, 3H), 3.93 (s, 0.54H, OMe of the minor isomer), 2.45–2.36 (m, 2H), 2.36–2.30 (m, 0.21H), 2.20 (d, *J* = 9.6 Hz, 0.20H), 2.08–1.96 (m, 1.22H), 1.51–1.46 (m, 1H), 1.46 (s, 0.6H, Me of the minor isomer), 1.19 (s, 3H);

**<sup>13</sup>C NMR** (151 MHz, CDCl<sub>3</sub>) δ (peaks of isomers were recorded together and not assigned to each isomer) 158.09, 157.23, 148.42, 139.23, 137.99, 137.82, 132.84, 131.81, 131.40, 131.39, 130.26, 130.20, 129.22, 128.82, 120.18, 119.36, 115.10, 114.79, 113.73, 112.92, 55.21, 55.08, 33.37, 33.13, 30.93, 30.71, 30.59, 30.22, 29.78, 27.91, 27.68, 17.47.

**HRMS** (ESI-TOF) (*m/z*): Calcd for C<sub>20</sub>H<sub>21</sub>BrO ([M + H]<sup>+</sup>), 357.0849; found 357.0856.

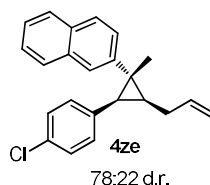

**2-((1R\*,2S\*,3S\*)-2-allyl-3-(4-chlorophenyl)-1-methylcyclopropyl)naphthalene (4ze):**

following the general procedure, the reaction of 2-(4-chlorophenyl)-5,5-dimethyl-1,3,2-dioxaborinane (0.30 mmol, 1.5 equiv., 66.6 mg), 3-bromoprop-1-ene (0.60 mmol, 3.0 equiv., 72.0 mg) and 2-(1-methylcycloprop-2-en-1-yl)naphthalene (0.20 mmol, 1.0 equiv.,

36.0 mg) afforded **4ze** (15.7 mg, 24% yield, 78:22 d.r.) as a colorless oil.

**<sup>1</sup>H NMR** (600 MHz, CDCl<sub>3</sub>) δ (overlapped peaks of isomers were assigned together) 7.86-7.77 (m, 4.3H), 7.77-7.71 (m, 0.6H), 7.63 (s, 0.3H), 7.55-7.50 (m, 1H), 7.50-7.41 (m, 2.6H), 7.36-7.27 (m, 4H), 7.22-7.17 (m, 0.3H), 7.02-6.97 (m, 0.6H), 6.64-6.58 (m, 0.6H), 6.06 (ddt, *J* = 17.4, 10.8, 6.0 Hz, 1H), 5.72 (ddt, *J* = 17.4, 10.8, 6.0 Hz, 0.3H), 5.24-5.17 (m, 1H), 5.16-5.09 (m, 1H), 5.07-5.01 (m, 0.3H), 4.99-4.93 (m, 0.3H), 2.54 (d, *J* = 9.6 Hz, 1H), 2.51 (t, *J* = 6.0 Hz, 0.3H), 2.47-2.37 (m, 1H), 2.32-2.24 (m, 0.3H), 2.13-2.01 (m, 1.3H); 1.67 (dt, *J* = 9.0, 6.0 Hz, 1H), 1.60-1.56 (m, 0.3H), 1.56 (s, 1H, methyl of the minor isomer), 1.30 (s, 3H, methyl of the major isomer);

**<sup>13</sup>C NMR** (151 MHz, CDCl<sub>3</sub>) δ (peaks correspond to both isomers and are not assigned to each isomer) 146.29, 137.87, 137.62, 137.36, 137.23, 135.80, 133.55, 133.52, 132.31, 132.13, 132.10, 131.96, 130.72, 130.50, 129.53, 129.16, 128.46, 128.14, 127.95, 127.71, 127.64, 127.58, 127.55, 127.40, 126.26, 126.07, 125.82, 125.66, 125.45, 125.40, 115.30, 114.98, 33.63, 33.31, 32.55, 31.60, 30.57, 30.28, 29.73, 28.54, 27.61, 17.68.

**HRMS** (ESI-TOF) (*m/z*): Calcd for C<sub>23</sub>H<sub>21</sub>Cl ([M + H]<sup>+</sup>), 333.1405; found 333.1412.

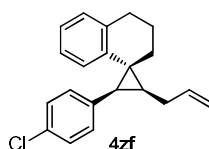

**(1R,2S\*,3S\*)-2-Allyl-3-(4-chlorophenyl)-3',4'-dihydro-2'H-spiro[cyclopropane-1,1'-naphthalene] (4zf)**: following the general procedure, the reaction of 2-(4-chlorophenyl)-5,5-dimethyl-1,3,2-dioxaborinane (0.30 mmol, 1.5 equiv., 67.3 mg), 3-bromoprop-1-ene (0.60 mmol, 3.0 equiv., 72.0 mg) and 3',4'-dihydro-2'H-spiro [cyclopropane-1,1'-naphthalen]-2-ene (0.20 mmol, 1.0 equiv., 31.2 mg) afforded **4zf** (27 mg, 44% yield) as a colorless oil.

**<sup>1</sup>H NMR** (600 MHz, CDCl<sub>3</sub>) δ 7.28–7.25 (m, 2H), 7.23–7.19 (m, 2H), 7.19–7.14 (m, 1H), 7.11–7.06 (m, 2H), 6.85 (d, *J* = 7.8 Hz, 1H), 6.03–5.94 (m, 1H), 5.14–5.08 (m, 1H), 5.07–5.03 (m, 1H), 2.93–2.80 (m, 2H), 2.57 (d, *J* = 9.6 Hz, 1H), 2.40–2.33 (m, 1H), 2.21–2.14 (m, 1H), 1.87–1.81 (m, 2H), 1.68–1.62 (m, 1H), 1.55–1.52 (m, 2H).

**<sup>13</sup>C NMR** (151 MHz, CDCl<sub>3</sub>) δ 142.42, 137.79, 137.45, 135.55, 132.06, 132.01, 128.82, 128.39, 126.37, 124.75, 121.83, 115.24, 35.35, 32.16, 30.82, 29.77, 25.37, 25.11, 22.16.

**HRMS** (ESI-TOF) (*m/z*): Calcd for C<sub>21</sub>H<sub>21</sub>Cl ([M + H]<sup>+</sup>), 309.1404; found 309.1409.

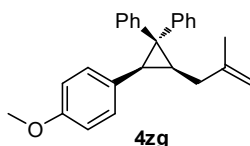

**((2S\*,3S\*)-2-(4-Methoxyphenyl)-3-(2-methylallyl)cyclopropane-1,1-diyl)dibenzene (4zg)**: following the general procedure, the reaction of 2-(4-methoxyphenyl)-5,5-dimethyl-1,3,2-dioxaborinane (0.30 mmol, 1.5 equiv., 66.0 mg), 3-bromo-2-methylprop-1-ene (0.60 mmol, 3.0 equiv., 81.0 mg) and 3,3-diphenyl cyclopropene (0.20 mmol, 1.0 equiv., 38.4 mg)

afforded **4zg** (47.5 mg, 67% yield) as a colorless oil.

**<sup>1</sup>H NMR** (600 MHz, CDCl<sub>3</sub>) δ 7.27–7.23 (m, 2H), 7.18–7.09 (m, 7H), 7.06–7.01 (m, 1H), 6.67–6.59 (m, 4H), 4.80 (s, 1H), 4.71 (s, 1H), 3.66 (s, 3H), 2.73 (d, *J* = 9.6 Hz, 1H), 2.49–2.40 (m, 1H), 2.12–2.01 (m, 2H), 1.61 (s, 3H).

**<sup>13</sup>C NMR** (151 MHz, CDCl<sub>3</sub>) δ 157.43, 149.29, 145.27, 138.03, 132.05, 130.73, 130.11, 128.39, 128.18, 127.45, 126.44, 125.72, 112.89, 110.33, 55.08, 39.68, 34.79, 33.39, 30.63, 23.48.

**HRMS** (ESI-TOF) (*m/z*): Calcd for C<sub>26</sub>H<sub>26</sub>NaO ([M + Na]<sup>+</sup>), 377.1863; found 377.1876.

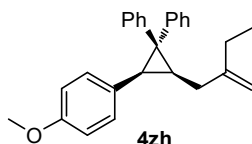

**((2S\*,3S\*)-2-(4-Methoxyphenyl)-3-(2-methylenebutyl)cyclopropane-1,1-diyl)dibenzene (4zh)**: following the general procedure, the reaction of 2-(4-methoxyphenyl)- 5,5-dimethyl-1,3,2-dioxaborinane (0.30 mmol, 1.5 equiv., 66.0 mg), 2-(bromomethyl) but-1-ene (0.60 mmol, 3.0 equiv., 88.8 mg) and 3,3-diphenyl cyclopropene (0.20 mmol, 1.0 equiv., 38.4 mg) afforded **4zh** (51.4 mg, 70% yield) as a colorless oil.

**<sup>1</sup>H NMR** (600 MHz, CDCl<sub>3</sub>) δ 7.27–7.23 (m, 2H), 7.1–7.13 (m, 4H), 7.13–7.09 (m, 3H), 7.07–7.03 (m, 1H), 6.67–6.63 (m, 2H), 6.63–6.59 (m, 2H), 4.85 (s, 1H), 4.73 (s, 1H), 3.67 (s, 3H), 2.74 (d, *J* = 9.6 Hz, 1H), 2.48–2.41 (m, 1H), 2.13–2.04 (m, 2H), 1.97–1.86 (m, 2H), 0.92–0.87 (t, *J* = 7.8 Hz, 3H).

**<sup>13</sup>C NMR** (151 MHz, CDCl<sub>3</sub>) δ 157.41, 151.87, 149.30, 138.02, 132.07, 130.73, 130.13, 128.38, 128.16, 127.43, 126.44, 125.70, 112.87, 108.22, 55.09, 39.68, 34.84, 31.88, 30.61, 29.84, 12.51.

**HRMS** (ESI-TOF) (*m/z*): Calcd for C<sub>27</sub>H<sub>28</sub>NaO ([M + Na]<sup>+</sup>), 391.2032; found 391.2033.

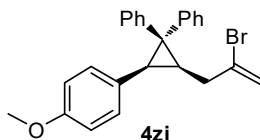

**((2S\*,3S\*)-2-(2-Bromoallyl)-3-(4-methoxyphenyl)cyclopropane-1,1-diyl)dibenzene (4zi)**: following the general procedure, the reaction of 2-(4-methoxyphenyl)- 5,5-dimethyl-1,3,2-dioxaborinane (0.30 mmol, 1.5 equiv., 66.0 mg), 2,3- dibromoprop-1-ene (0.60 mmol, 3.0 equiv., 118.7 mg) and 3,3-diphenyl cyclopropene (0.20 mmol, 1.0 equiv., 84.0 mg) afforded **4zi** (56.0 mg, 67% yield) as a colorless oil.

**<sup>1</sup>H NMR** (600 MHz, CDCl<sub>3</sub>) δ 7.30–7.26 (m, 2H), 7.20–7.15 (m, 4H), 7.15–7.10 (m, 3H), 7.08–7.04 (m, 1H), 6.62 (s, 4H), 5.45 (s, 1H), 5.31 (s, 1H), 3.67 (s, 3H), 2.95– 2.89 (m, 1H), 2.76 (d, *J* = 9.6 Hz, 1H), 2.57–2.51 (m, 1H), 2.21–2.15 (m, 1H).

**<sup>13</sup>C NMR** (151 MHz, CDCl<sub>3</sub>) δ 157.62, 148.68, 137.51, 132.92, 131.82, 130.63, 129.17, 128.49, 128.37, 127.56, 126.70, 126.00, 117.02, 113.04, 55.11, 39.93, 37.77, 34.35, 30.35.

**HRMS** (ESI-TOF) (*m/z*): Calcd for C<sub>25</sub>H<sub>23</sub>BrO ([M + H]<sup>+</sup>), 419.1005; found 419.1012.

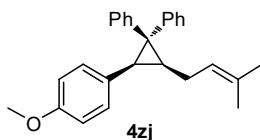

**((2S\*,3S\*)-2-(4-methoxyphenyl)-3-(3-methylbut-2-en-1-yl)cyclopropane-1,1-diyl)dibenzene (4zj):** following the general procedure, the reaction of 2-(4-methoxyphenyl)-5,5-dimethyl-1,3,2-dioxaborinane (0.30 mmol, 1.5 equiv., 66.0 mg, 1-bromo-3-methylbut-2-ene (0.60 mmol, 3.0 equiv., 89.4 mg) and 3,3-diphenyl cyclopropene (0.20 mmol, 1.0 equiv., 38.4 mg) afforded **4zj** (44.2 mg, 60% yield) as a colorless oil.

**<sup>1</sup>H NMR** (600 MHz, CDCl<sub>3</sub>) δ 7.22–7.19 (m, 2H), 7.17–7.12 (m, 4H), 7.12–7.06 (m, 3H), 7.05–7.00 (m, 1H), 6.70–6.65 (m, 2H), 6.64–6.60 (m, 2H), 5.15–5.10 (m, 1H), 3.67 (s, 3H), 2.64 (d, *J* = 9.6 Hz, 1H), 2.47–2.40 (m, 1H), 2.11–2.03 (m, 1H), 1.91–1.85 (m, 1H), 1.61 (s, 3H), 1.49 (s, 3H).

**<sup>13</sup>C NMR** (151 MHz, CDCl<sub>3</sub>) δ 157.40, 149.40, 138.00, 132.25, 131.97, 130.68, 130.29, 128.32, 128.16, 127.50, 126.37, 125.64, 123.59, 112.96, 55.10, 40.24, 34.92, 33.07, 25.79, 24.77, 18.05.

**HRMS** (ESI-TOF) (*m/z*): Calcd for C<sub>27</sub>H<sub>28</sub>O ([M + H]<sup>+</sup>), 369.2212; found 369.2220.

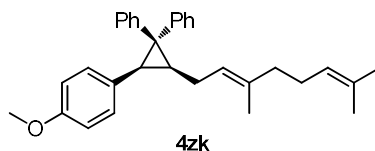

**((2S\*,3S\*)-2-((E)-3,7-Dimethylocta-2,6-dien-1-yl)-3-(4-methoxyphenyl)cyclopropane-1,1-diyl)dibenzene (4zk):** following the general procedure, the reaction of 2-(4-methoxyphenyl)-5,5-dimethyl-1,3,2-dioxaborinane (0.30 mmol, 1.5 equiv., 66.0 mg), (*E*)-1-bromo-3,7-dimethylocta-2,6-diene (0.60 mmol, 1.5 equiv., 64.8 mg) and 3,3-diphenyl cyclopropene (0.20 mmol, 1.0 equiv., 38.4 mg) afforded **4zk** (35.8 mg, 41% yield) as a white solid. M.p. 116–119°C.

**<sup>1</sup>H NMR** (600 MHz, CDCl<sub>3</sub>) δ 7.32–7.29 (m, 2H), 7.25–7.20 (m, 4H), 7.19–7.15 (m, 3H), 7.13–7.09 (m, 1H), 6.78–6.74 (m, 2H), 6.71–6.68 (m, 2H), 5.26–5.22 (m, 1H), 5.12–5.07 (m, 1H), 3.75 (s, 3H), 2.72 (d, *J* = 10.2 Hz, 1H), 2.53–2.46 (m, 1H), 2.20–2.13 (m, 1H), 2.12–2.04 (m, 2H), 2.04–1.92 (m, 3H), 1.68–1.66 (m, 3H), 1.61–1.59 (m, 3H), 1.57–1.54 (m, 3H).

**<sup>13</sup>C NMR** (151 MHz, CDCl<sub>3</sub>) δ 157.39, 149.45, 138.08, 135.55, 132.20, 131.34, 130.68, 130.30, 128.33, 128.16, 127.60, 126.34, 125.65, 124.26, 123.68, 112.95, 55.10, 40.34, 39.67, 34.78, 32.99, 26.59, 25.70, 24.67, 17.71, 16.34.

**HRMS** (ESI-TOF) (*m/z*): Calcd for C<sub>32</sub>H<sub>36</sub>O ([M + H]<sup>+</sup>), 437.2838; found 437.2846.

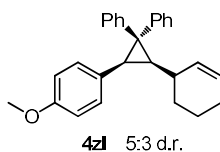

**((2S\*,3S\*)-2-((S)-Cyclohex-2-en-1-yl)-3-(4-methoxyphenyl)cyclopropane-1,1-diyl)dibenzene**



**ene (4zl):** following the general procedure, the reaction of 2-(4-methoxyphenyl)-5,5-dimethyl-1,3,2-dioxaborinane (0.30 mmol, 1.5 equiv., 66.0 mg), 1-(bromomethyl)cyclohex-1-ene (0.60 mmol, 3.0 equiv., 96.6 mg) and 3,3-diphenylcyclopropene (0.20 mmol, 1.0 equiv., 38.4 mg) afforded **4zl** (47.7 mg, 63% yield, 5:3 d.r.) as a colorless oil.

**<sup>1</sup>H NMR** (600 MHz, CDCl<sub>3</sub>)  $\delta$  (most peaks of the two diastereomers overlap and have been integrated and assigned together) 7.31-7.21 (m, 3.51H), 7.18-7.06 (m, 11.7H), 7.06-7.00 (m, 1.72H), 6.69-6.64 (m, 1.25H), 6.63-6.57 (m, 5.20H), 6.19-6.14 (m, 1H, H<sub>a</sub> (vinyl) of the major isomer), 5.82-5.76 (m, 1H, H<sub>b</sub> (vinyl) of the major isomer), 5.50-5.44 (m, m, 1H, H<sub>b</sub> (vinyl) of the minor isomer), 5.07-5.02 (m, 1H, H<sub>a</sub> (vinyl) of the major isomer), 3.67 (s, 5H), 2.65 (d, *J* = 10.2 Hz, 0.60H), 2.63 (d, *J* = 9.6 Hz, 1H), 2.43-2.35 (m, 0.6H), 2.35-2.27 (m, 1H), 2.27-2.21 (m, 0.6H), 2.04-1.83 (m, 3.6H), 1.83-1.72 (m, 2H), 1.72-1.65 (m, 1H), 1.64-1.55 (m, 0.8H), 1.55-1.47 (m, 1.2H), 1.31-1.21 (m, 2.3H), 1.11-1.00 (m, 1H), 0.84-0.76 (m, 0.50H);

**<sup>13</sup>C NMR** (151 MHz, CDCl<sub>3</sub>)  $\delta$  (peaks of each diastereomer were not assigned)  $\delta$  157.42, 157.37, 149.48, 149.47, 138.36, 138.23, 132.03, 131.89, 131.71, 130.62, 130.60, 130.52, 130.35, 130.23, 128.36, 128.25, 128.22, 128.20, 127.81, 127.72, 127.57, 126.40, 126.38, 125.71, 125.69, 112.98, 112.91, 55.07, 41.28, 41.13, 39.01, 38.90, 34.46, 34.18, 31.50, 30.95, 30.72, 28.10, 25.26, 25.07, 21.33, 21.11.

**HRMS** (ESI-TOF) (*m/z*): Calcd for C<sub>29</sub>H<sub>30</sub>O ([M + H]<sup>+</sup>), 395.2369; found 395.2377.

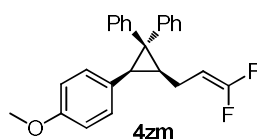

**((2S\*,3S\*)-2-(3,3-Difluoroallyl)-3-(4-methoxyphenyl)cyclopropane-1,1-diyl)dibenzene**

**(4zm):** following the general procedure, the reaction of 2-(4-methoxyphenyl)-5,5-dimethyl-1,3,2-dioxaborinane (0.30 mmol, 1.5 equiv., 66.0 mg), 3-bromo-3,3-difluoroprop-1-ene (0.60 mmol, 3.0 equiv., 93.5 mg) and 3,3-diphenylcyclopropene (0.20 mmol, 1.0 equiv., 38.4 mg) afforded **4zm** (34.6mg, 46% yield) as a colorless oil.

**<sup>1</sup>H NMR** (600 MHz, CDCl<sub>3</sub>)  $\delta$  7.23–7.20 (m, 2H), 7.19–7.11 (m, 5H), 7.09–7.03 (m, 3H), 6.66–6.61 (m, 4H), 3.98–3.89 (m, 1H), 3.67 (s, 3H), 2.67 (d, *J* = 9.6 Hz, 1H), 2.59–2.52 (m, 1H), 2.09–2.01 (m, 1H), 1.93–1.87 (m, 1H).

**<sup>13</sup>C NMR** (151 MHz, CDCl<sub>3</sub>)  $\delta$  157.60, 156.06 (t, <sup>1</sup>*J*<sub>C-F</sub> = 286.9 Hz), 148.76, 137.46, 131.92, 130.53, 129.35, 128.44, 128.35, 127.46, 126.67, 125.91, 113.13, 77.26 (t, <sup>2</sup>*J*<sub>C-F</sub> = 21.1 Hz), 55.12, 40.43, 34.45, 31.81 (t, <sup>4</sup>*J*<sub>C-F</sub> = 2.3 Hz), 19.43 (d, <sup>3</sup>*J*<sub>C-F</sub> = 4.5 Hz).

**<sup>19</sup>F NMR** (470 MHz, CDCl<sub>3</sub>)  $\delta$  – 88.67 (d, <sup>2</sup>*J*<sub>F-F</sub> = 47.0 Hz, 1F); – 90.35 (dd, <sup>2</sup>*J*<sub>F-F</sub> = 47.0 Hz, <sup>3</sup>*J*<sub>F-H (trans)</sub> = 25.6 Hz, 1F).

**HRMS** (ESI-TOF) (*m/z*): Calcd for C<sub>25</sub>H<sub>22</sub>F<sub>2</sub>O ([M + H]<sup>+</sup>), 377.1711; found 377.1719.

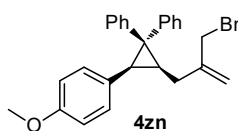

**((2S\*,3S\*)-2-(3,3-Difluoroallyl)-3-(4-methoxyphenyl)cyclopropane-1,1-diyl)dibenzene**

**(4zn)**: following the general procedure, the reaction of 2-(4-methoxyphenyl)-5,5-dimethyl-1,3,2-dioxaborinane (0.30 mmol, 1.5 equiv., 66.0 mg), 3-bromo-2-(bromomethyl)prop-1-ene (0.60 mmol, 3.0 equiv., 127.1mg) and 3,3-diphenylcyclopropene (0.20 mmol, 1.0 equiv., 38.4 mg) afforded **4zn** (32.0mg, 37%yield) as a pair of atropisomeric isomers (ratio: 3:2).

**<sup>1</sup>H NMR** (600 MHz, C<sub>6</sub>D<sub>6</sub>)  $\delta$  (overlapped peaks of the isomers are assigned together) 7.31-7.22 (m, 4H), 7.16 (s, 4H), 7.14-7.07 (m, 4H), 7.04-6.97 (m, 2H), 6.76-6.70 (m, 2H), 6.65-6.59 (m, 2H), 4.98 (s, 0.4H), 4.96 (s, 0.6H), 4.89 (s, 0.4H), 4.87 (s, 0.6H), 3.64 (d,  $J$  = 11.4 Hz, 0.4H), 3.55 (d,  $J$  = 10.2 Hz, 0.6H), 3.53 (d,  $J$  = 11.4 Hz, 0.4H), 3.44 (d,  $J$  = 10.2 Hz, 0.6H), 3.24 (s, 3H), 2.91 (dd,  $J$  = 17.4, 6.0 Hz, 0.6H), 2.85 (dd,  $J$  = 16.2, 6.0 Hz, 0.4H), 2.74 (d,  $J$  = 9.6 Hz, 1H), 2.40-2.28 (m, 1H), 2.07-2.00 (m, 1H);

**<sup>13</sup>C NMR** (151 MHz, CDCl<sub>3</sub>): (peaks of two isomers were not assigned and recorded together) 157.56, 148.98, 144.72, 144.45, 137.70, 137.68, 131.94, 130.64, 129.63, 128.45, 128.31, 127.39, 127.38, 126.63, 125.86, 115.74, 115.11, 113.01, 113.00, 55.11, 48.89, 39.75, 39.73, 37.33, 34.64, 34.62, 30.24, 30.18, 29.57, 29.21.

**HRMS** (ESI-TOF) ( $m/z$ ): Calcd for C<sub>25</sub>H<sub>22</sub>F<sub>2</sub>O ([M + H]<sup>+</sup>), 433.1162; found 433.1170.

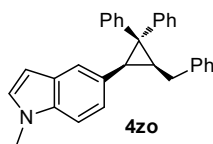

**5-((1S\*,3S\*)-3-benzyl-2,2-diphenylcyclopropyl)-1-methyl-1H-indole (4zo)**: following the general procedure, the reaction of 5-(5,5-dimethyl-1,3,2-dioxaborinane-2-yl)-1-methyl-1H-indole (0.30 mmol, 1.5 equiv., 72.9 mg), benzyl bromide (0.60 mmol, 3.0 equiv., 51.0 mg) and 3,3-diphenylcyclopropene (0.20 mmol, 1.0 equiv., 38.4 mg) afforded **4zo** (19.8 mg, 24% yield) as a colorless oil.

**<sup>1</sup>H NMR** (600 MHz, C<sub>6</sub>D<sub>6</sub>)  $\delta$  7.38-7.30 (m, 2H), 7.30-7.17 (m, 9H), 7.17-7.07 (m, 6H), 7.02-6.94 (m, 1H), 6.85-6.77 (m, 1H), 6.31 (d,  $J$  = 3.0 Hz, 1H), 3.74 (s, 3H), 3.23 (dd,  $J$  = 15.6, 6.6 Hz, 1H), 3.08-2.96 (m, 2H), 2.38-2.30 (m, 1H);

**<sup>13</sup>C NMR** (151 MHz, CDCl<sub>3</sub>):  $\delta$  149.50, 141.88, 138.34, 135.19, 132.28, 128.70, 128.48, 128.43, 128.36, 128.26, 128.10, 128.08, 127.60, 126.33, 125.70, 125.64, 124.43, 121.99, 108.22, 100.71, 39.89, 36.25, 33.43, 32.79, 31.60.

**HRMS** (ESI-TOF) ( $m/z$ ): Calcd for C<sub>25</sub>H<sub>22</sub>F<sub>2</sub>O ([M + H]<sup>+</sup>), 414.2216; found 414.2223.

## References

- [1] (a) Sherrill, W. M.; Kim, R.; Rubin, M. *Tetrahedron* **2008**, *64*, 8610 – 8617. (b) Phan, D. H. T.; Kou, K. G. M.; Dong, V. M. *J. Am. Chem. Soc* **2010**, *132*, 16354–16355. (c) Krämer, K.; Leong, P.; Lautens, M. *Org. Lett.* **2011**, *13*, 819-821. (c). Zhang, H.; Wang, B.; Yi, H.; Wang, J. *Org. Lett.* **2015**, *17*, 3322 – 3325.
- [2] Liu, X. Y.; Yang, C. T.; Zhang, Z. Q.; Lu, X.; Luo, X.; Xiao, B.; Fu, Y. *Chem. Commun.* **2015**, *51*, 2388 – 2391.
- [3] Zhao, H.; Chen, X. W.; Jiang, H. F.; Zhang, M. *Org. Chem. Front.* **2018**, *5*, 539–543.

#### 4. NMR spectra and HPLC chromatographs of new compounds

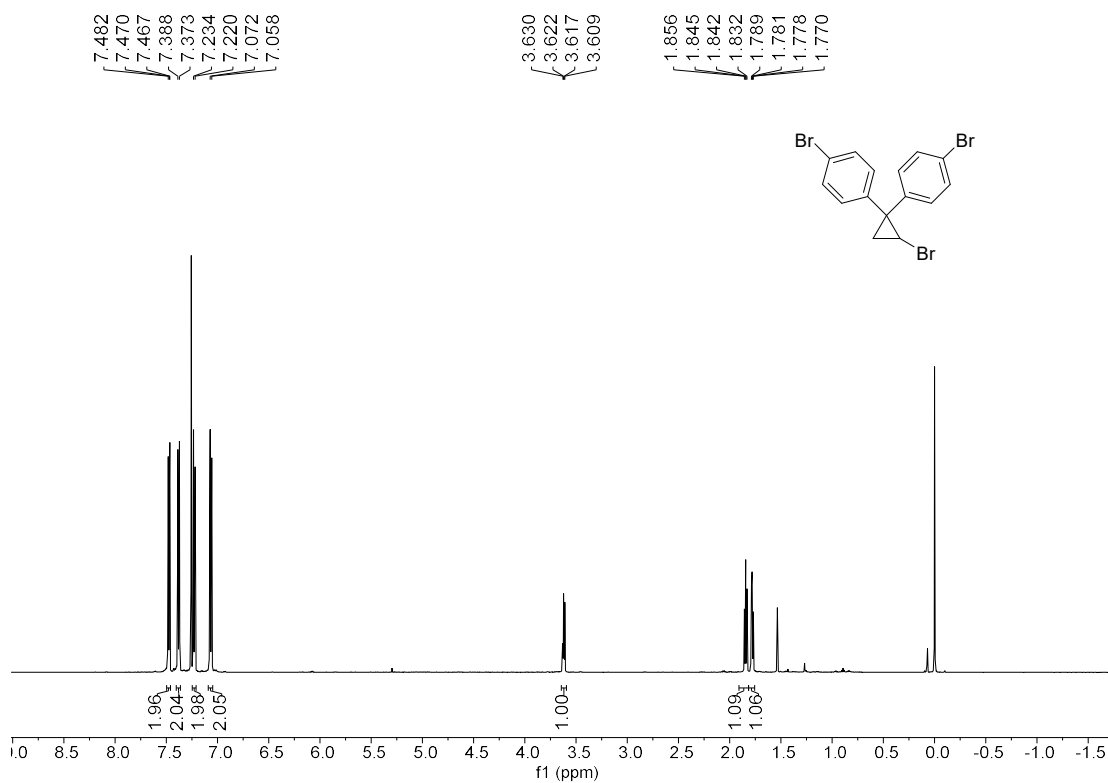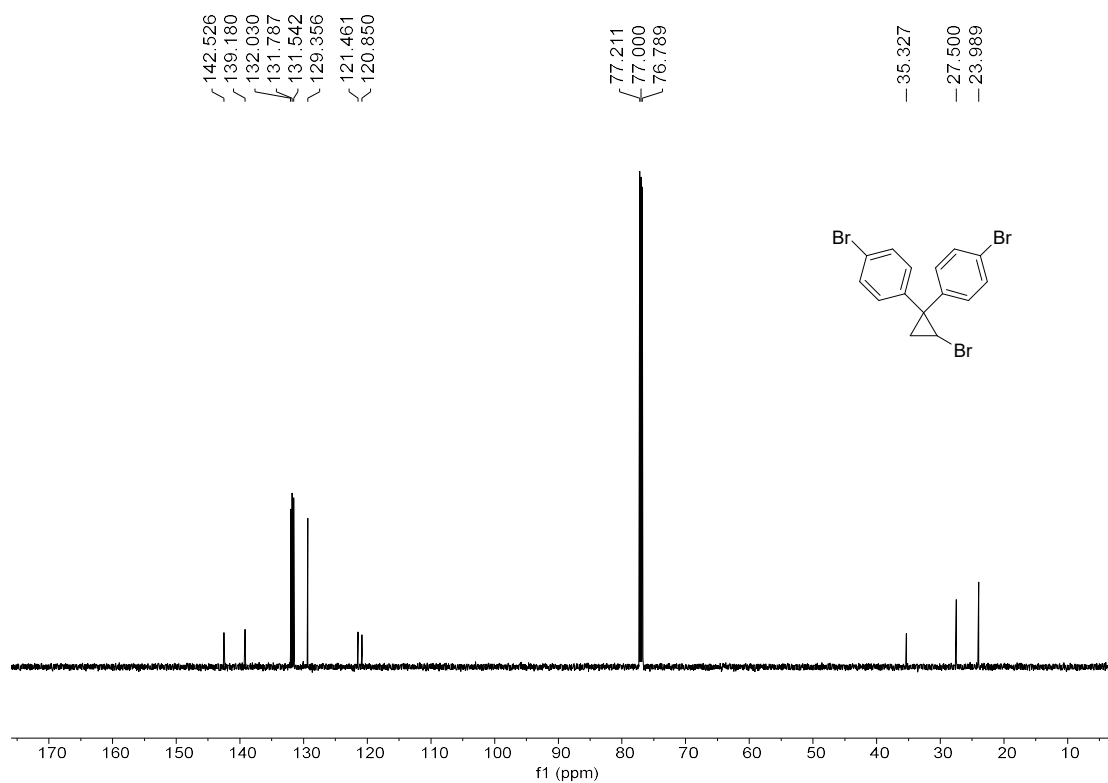

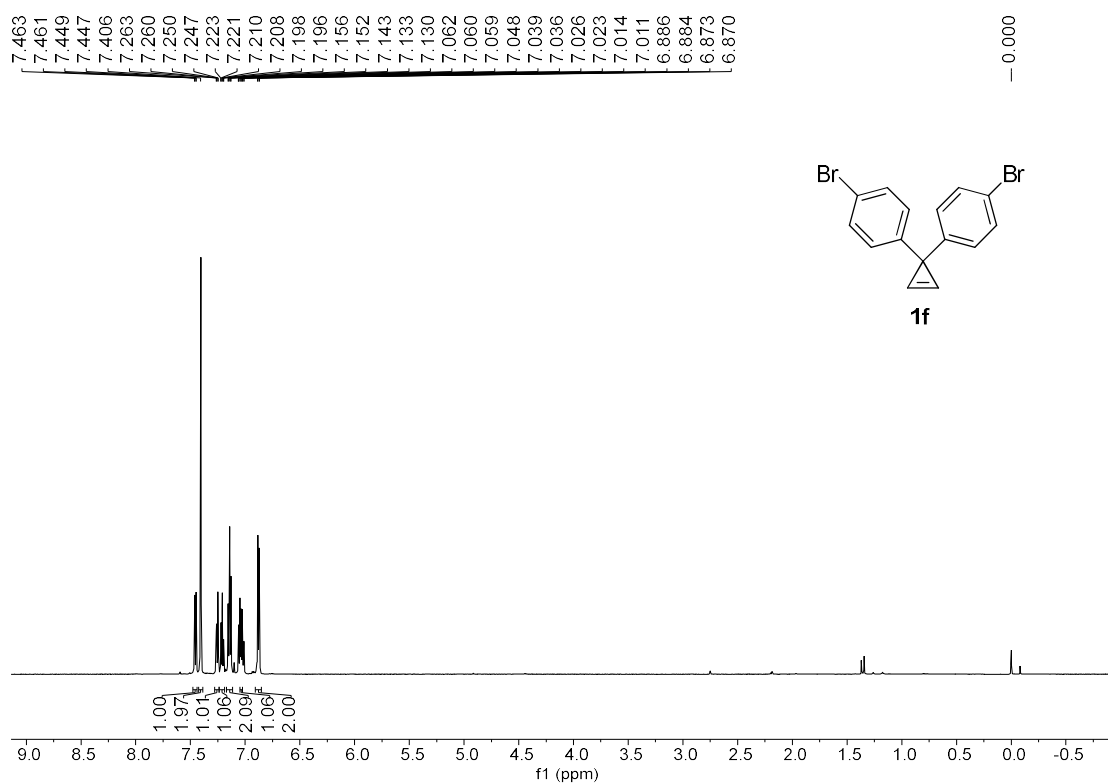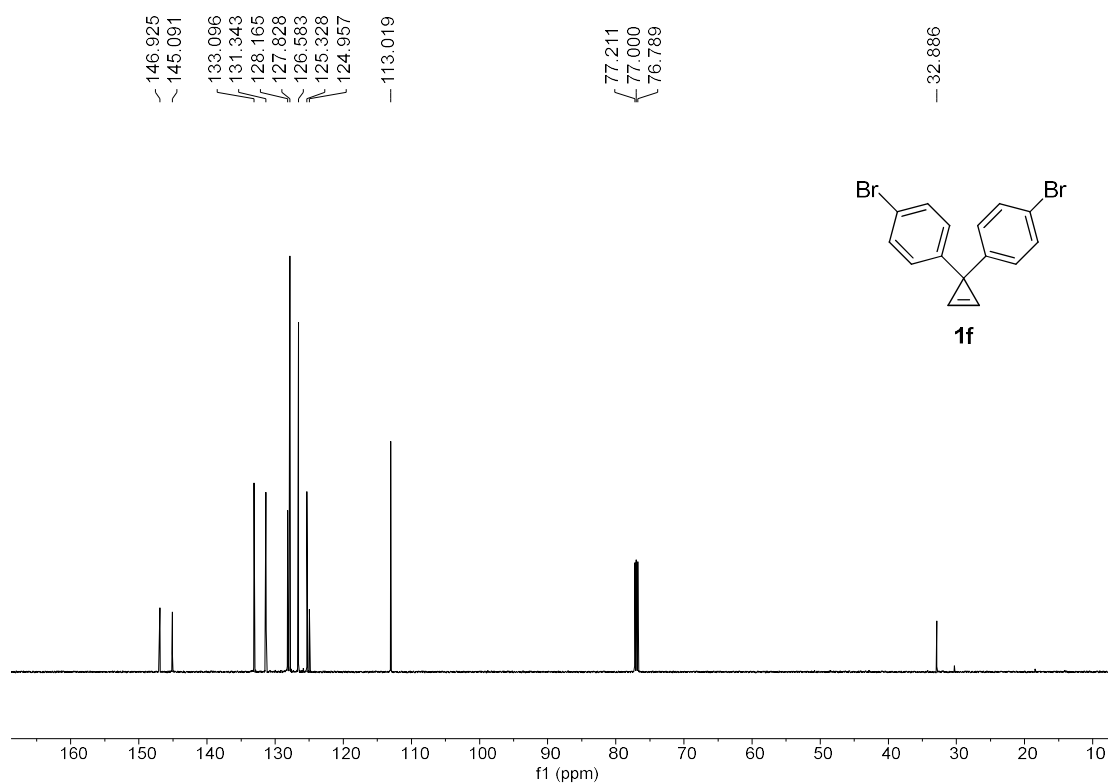

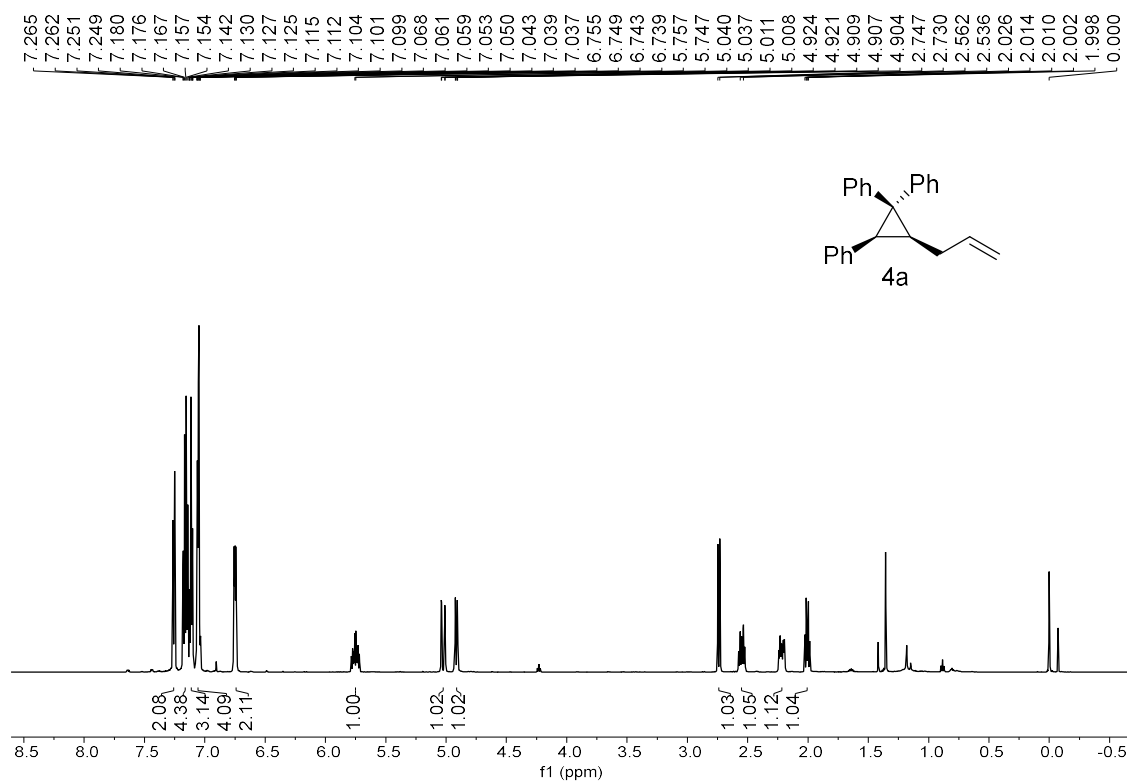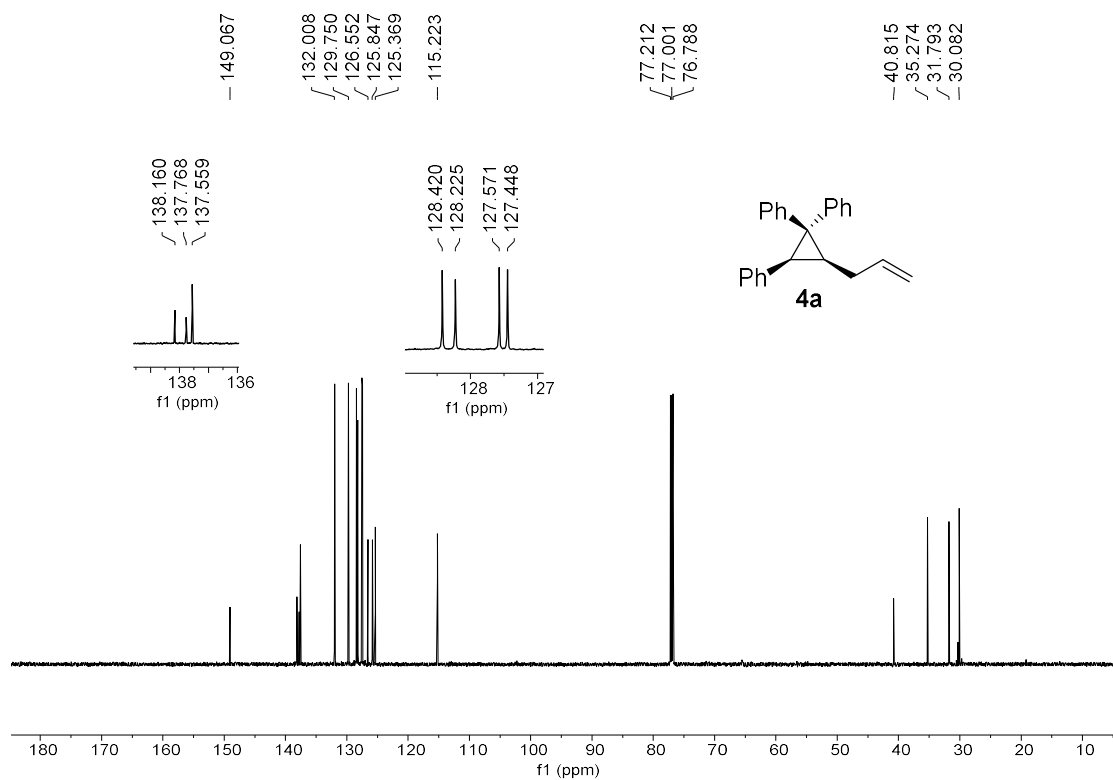

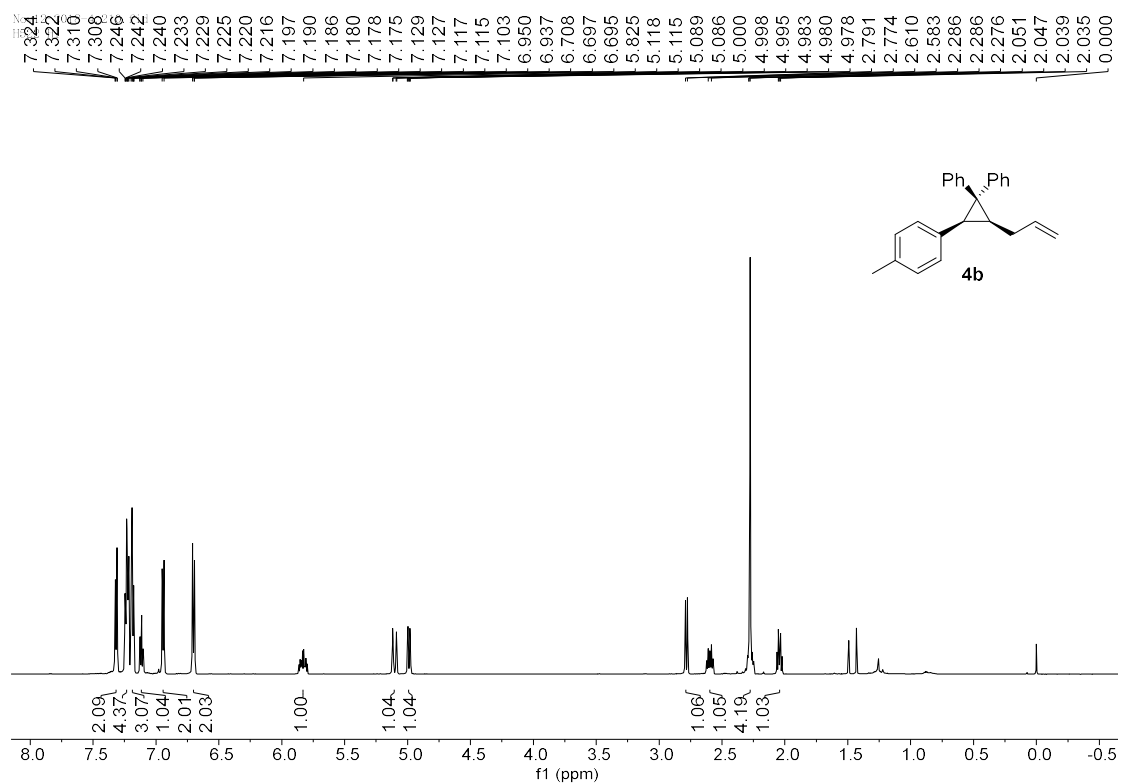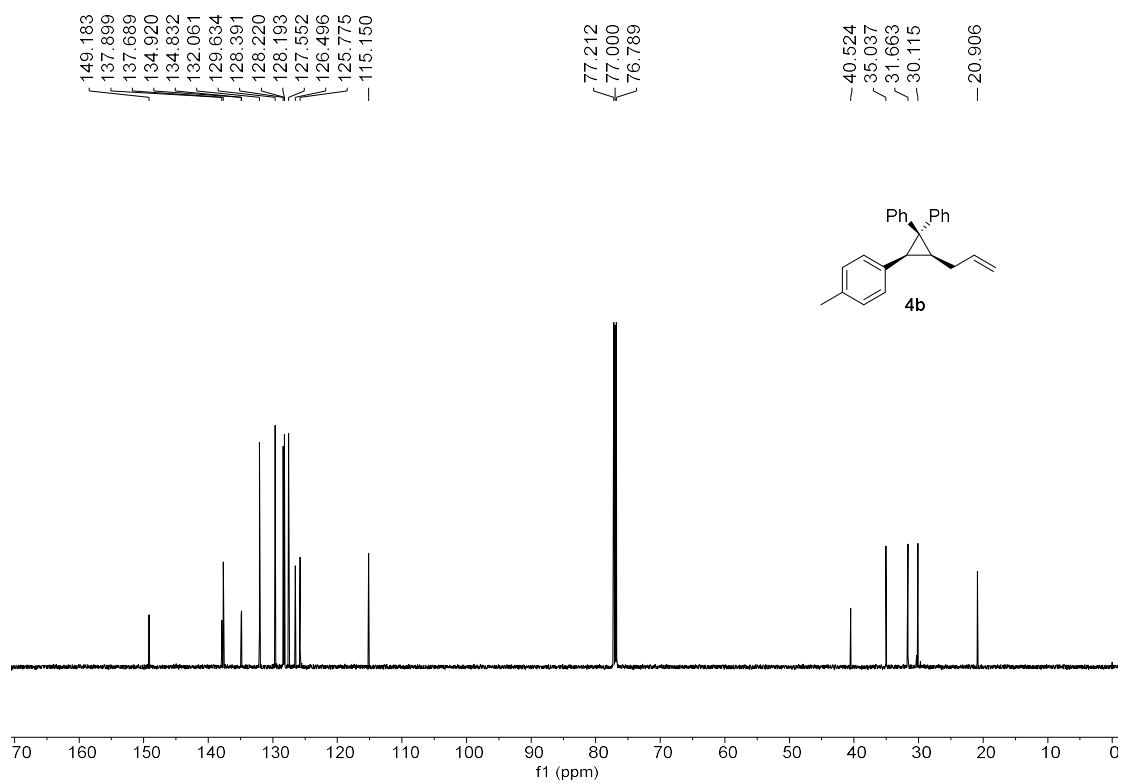

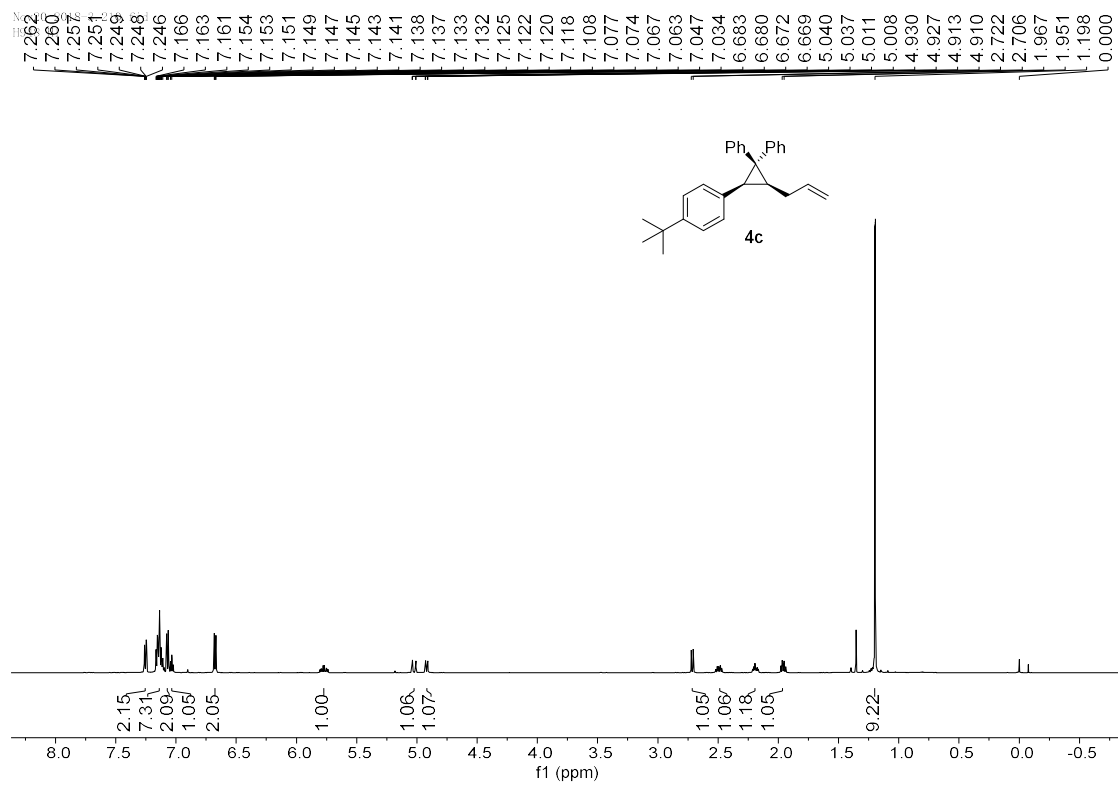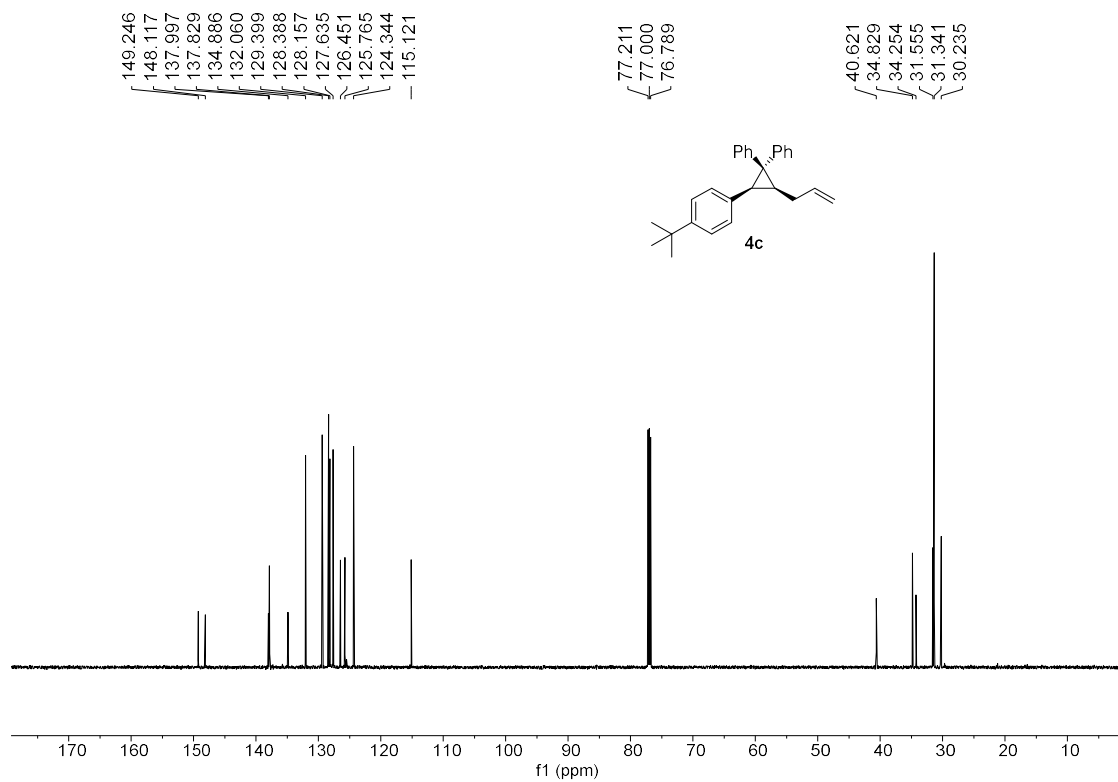



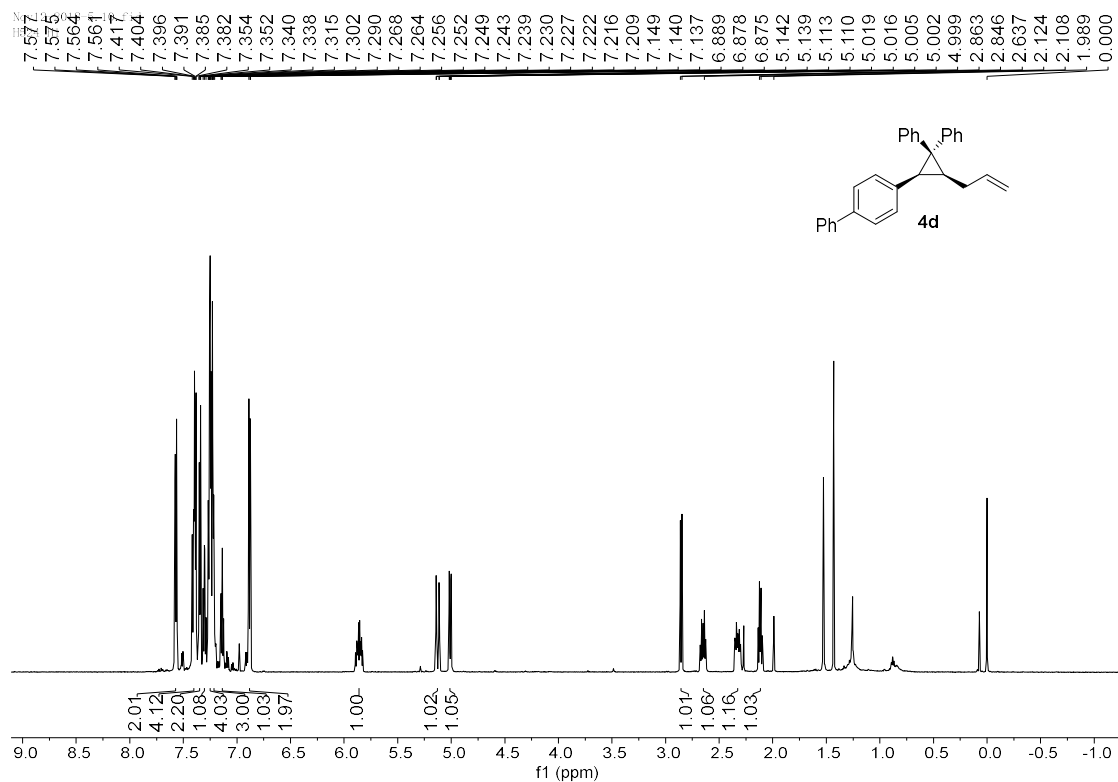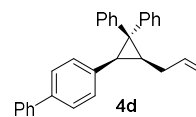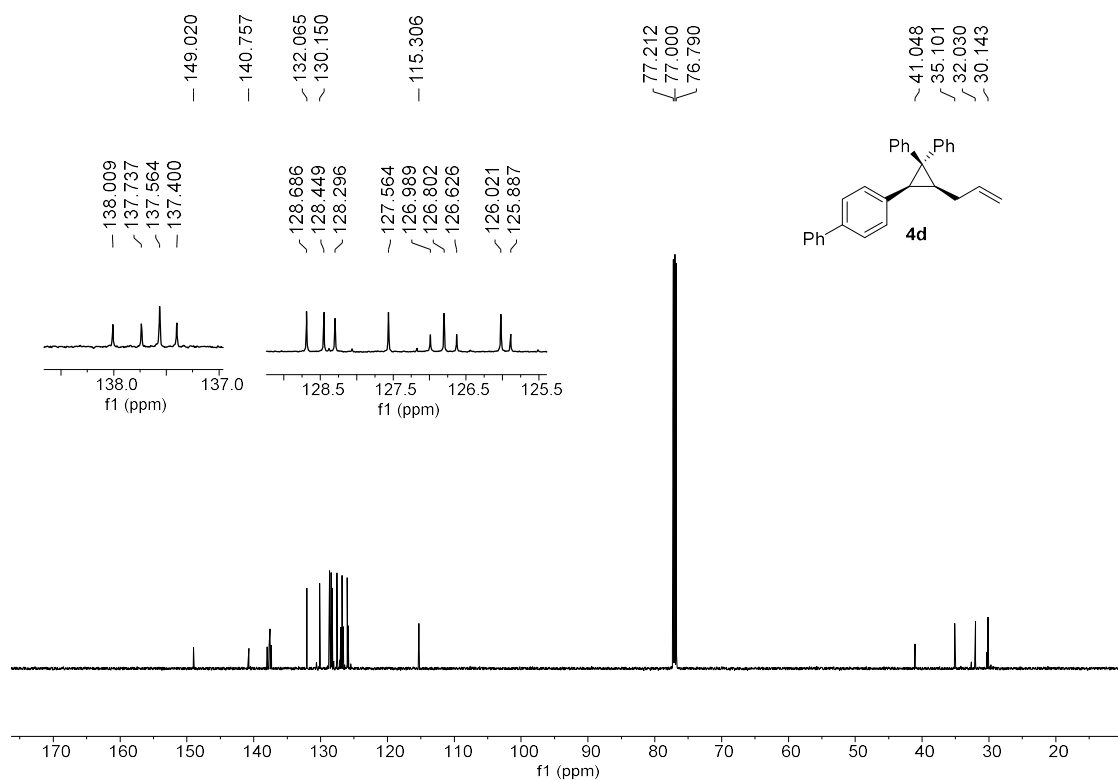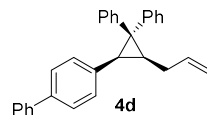

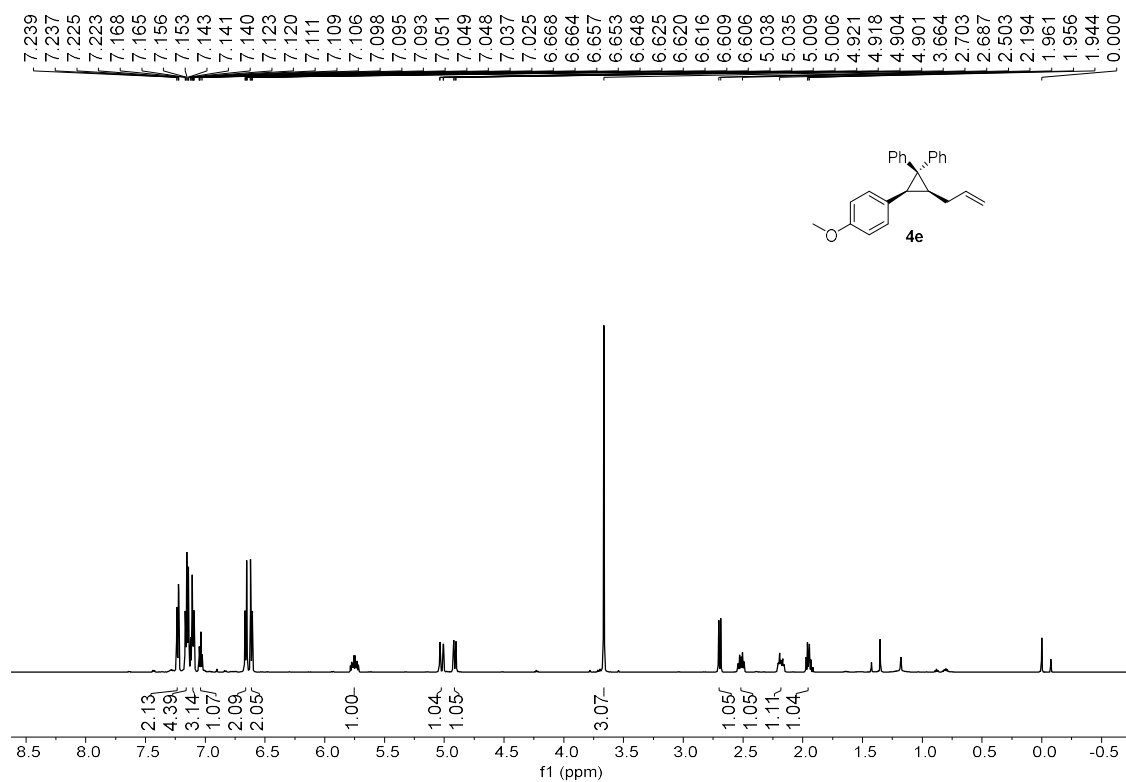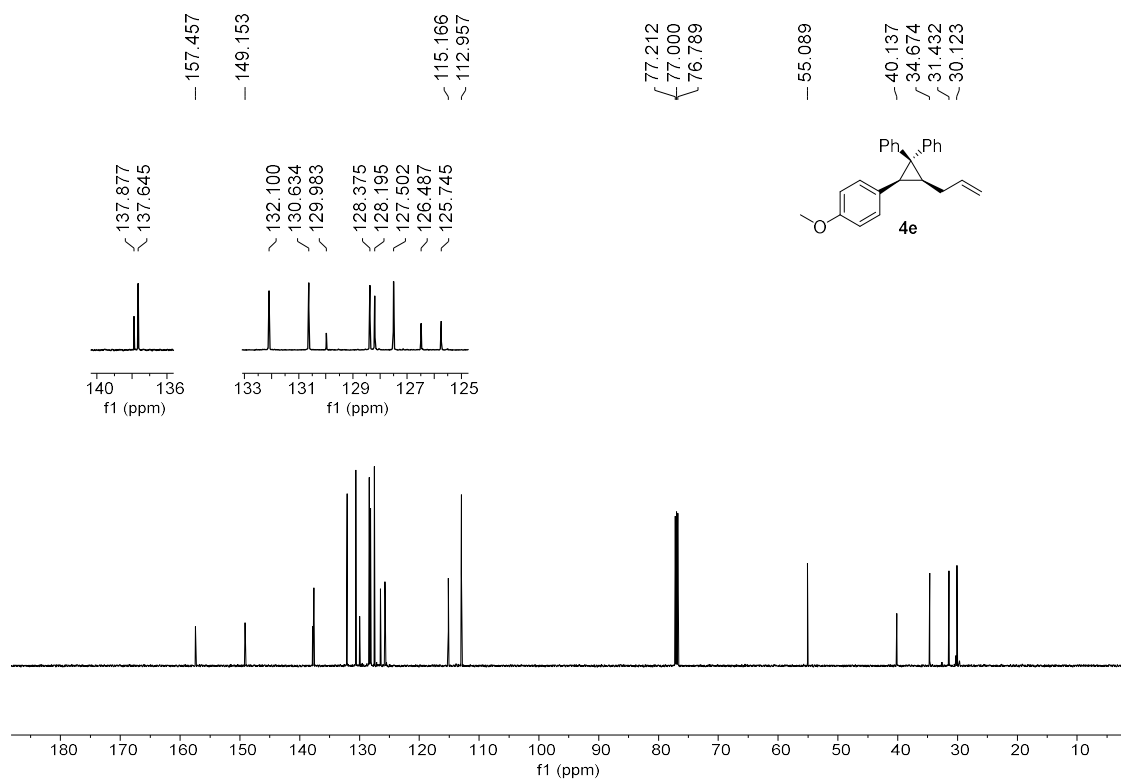

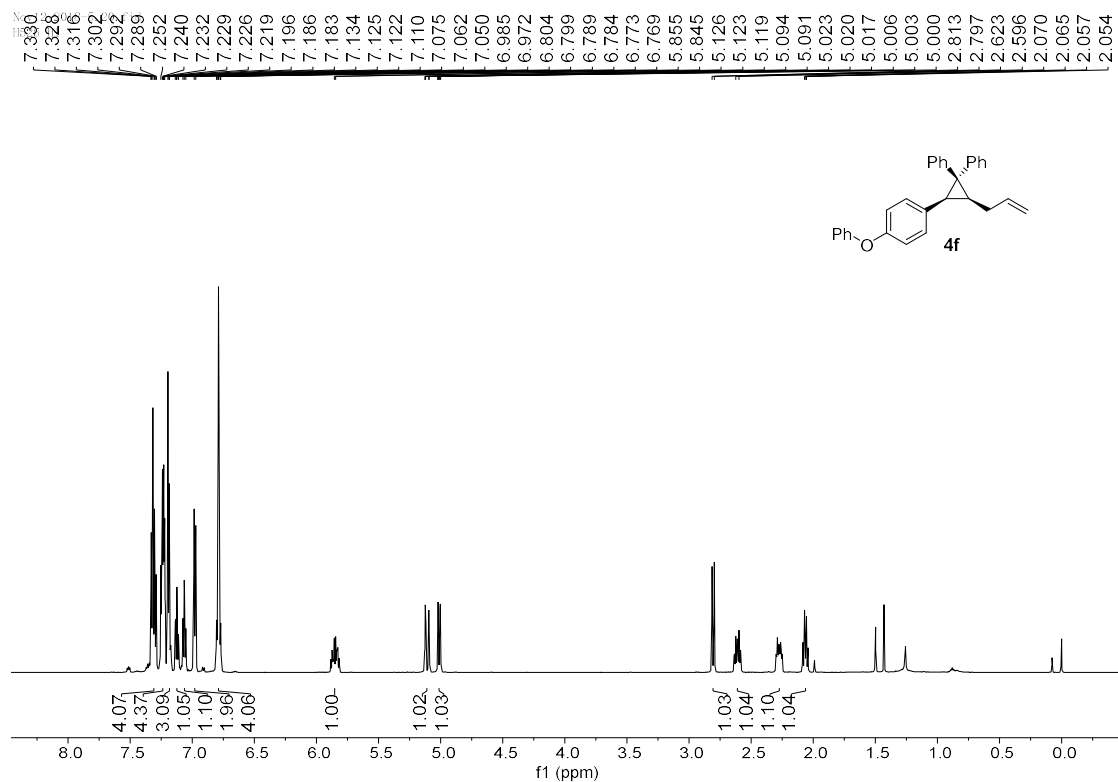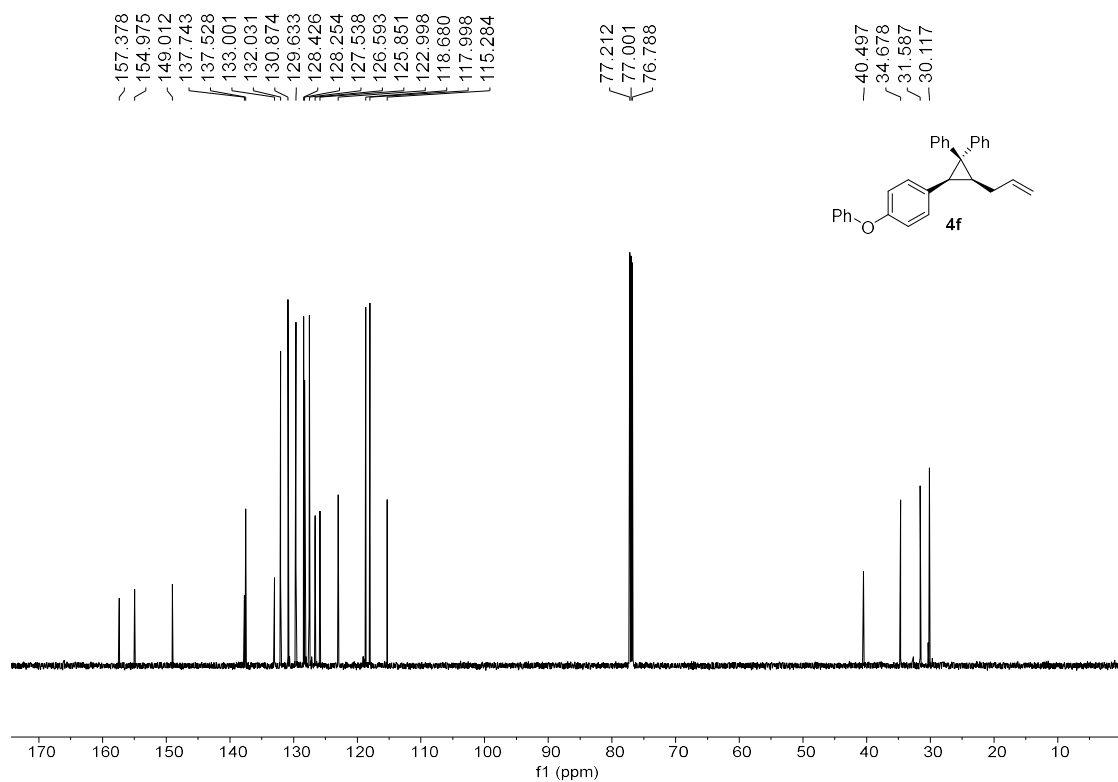

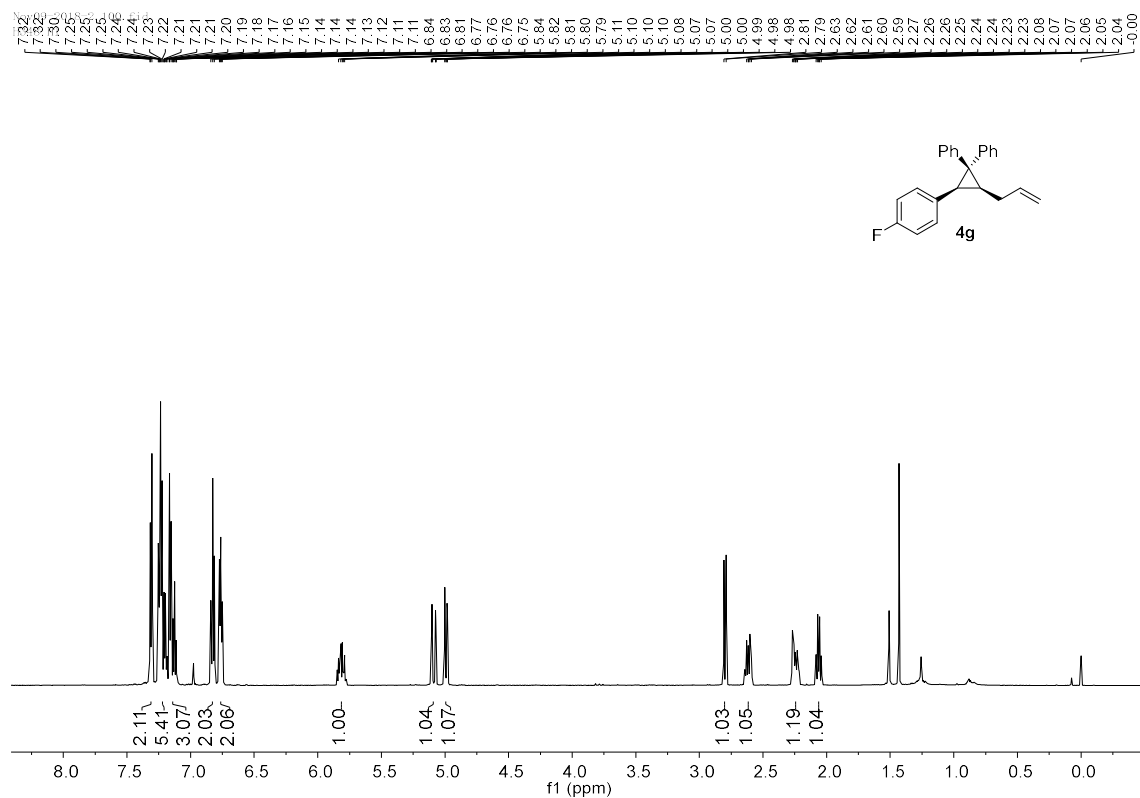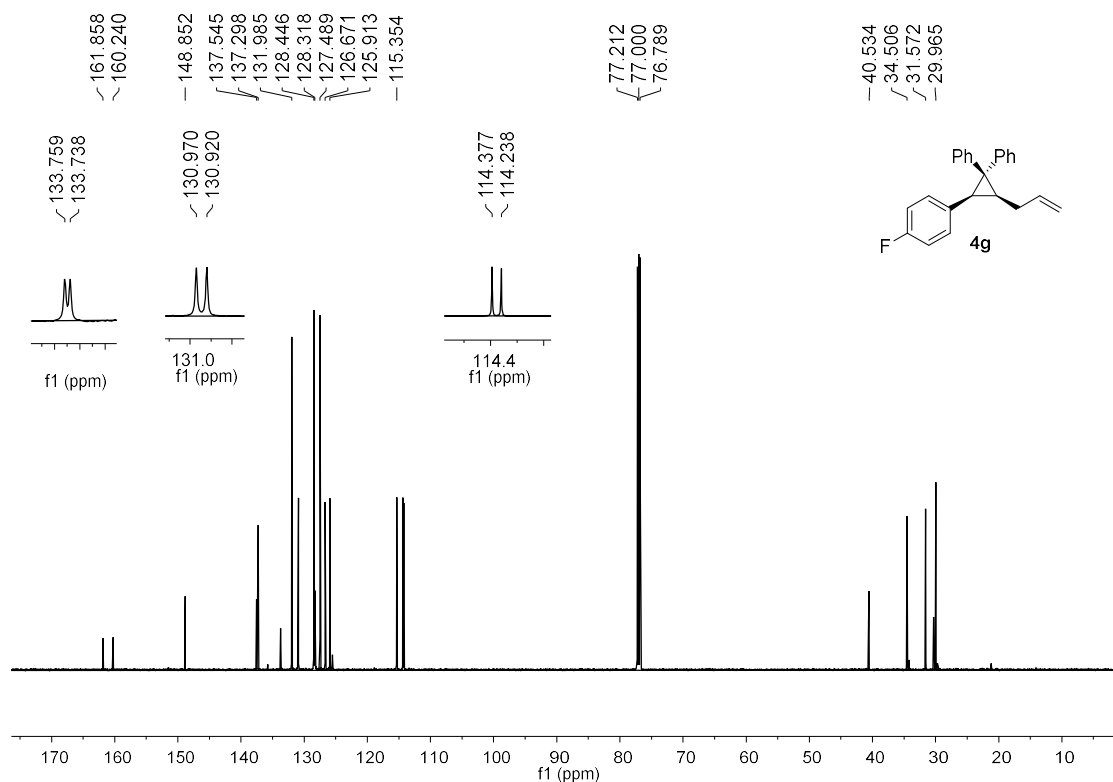

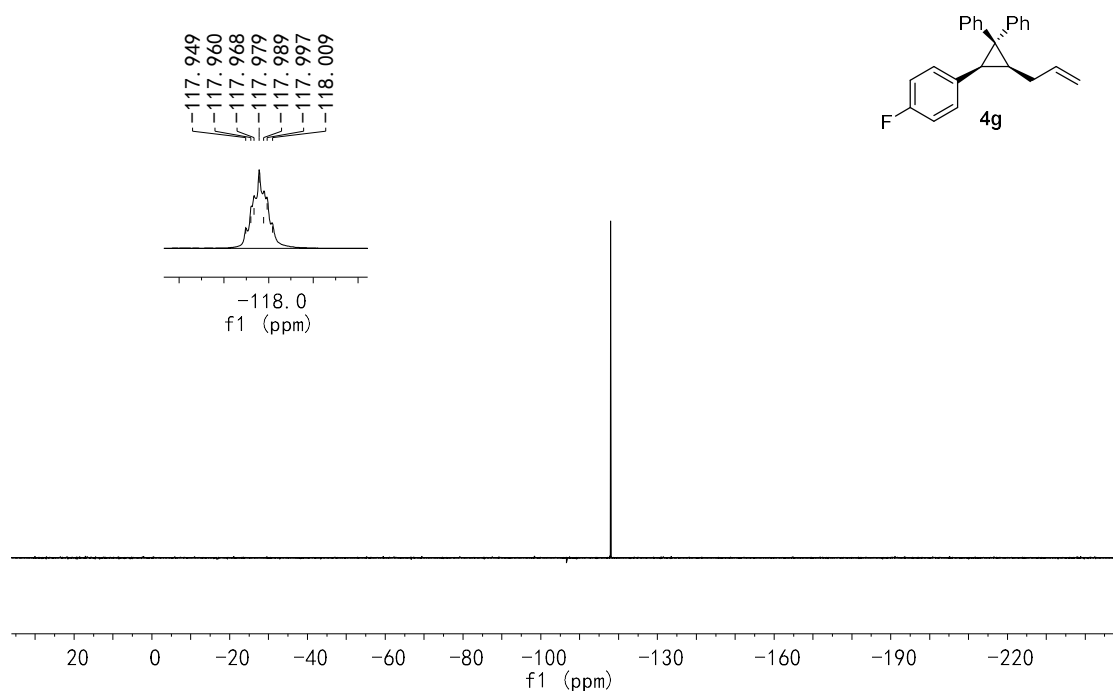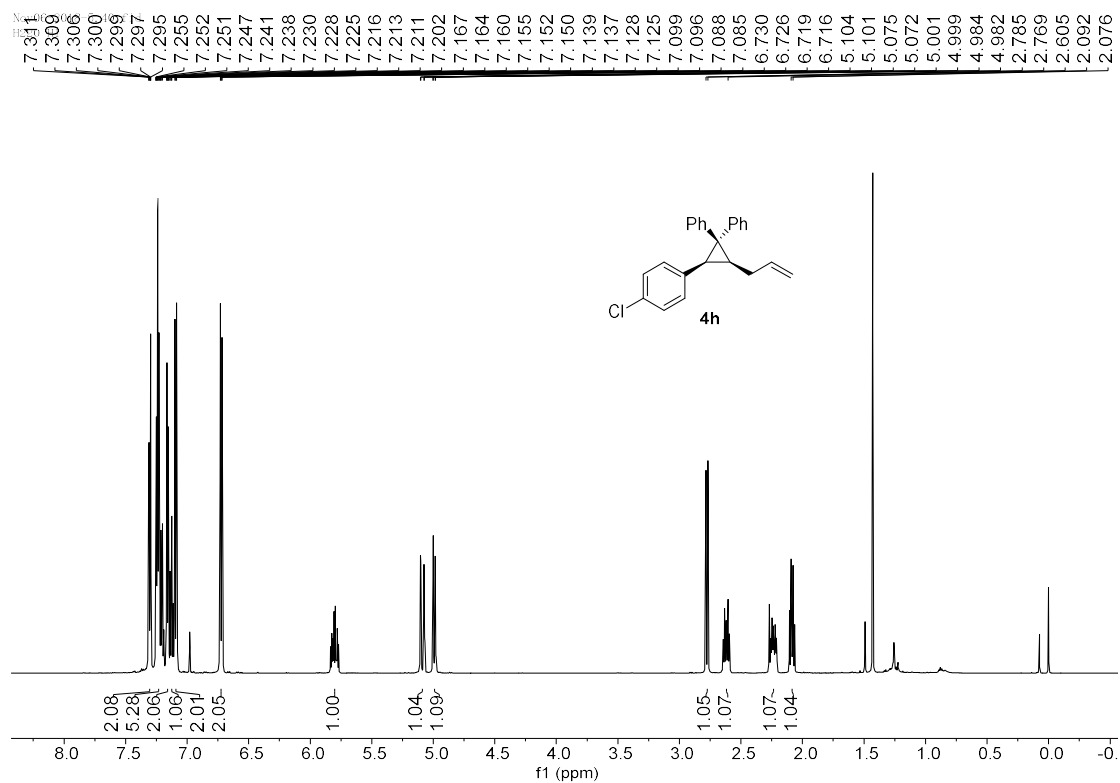

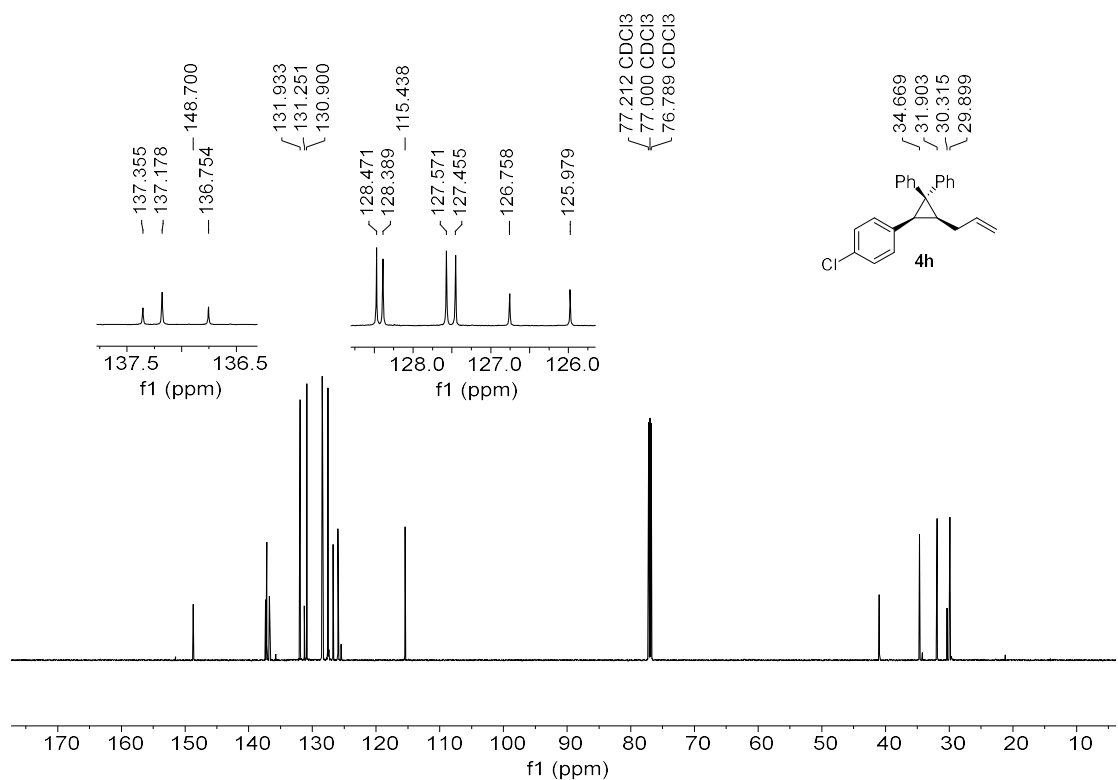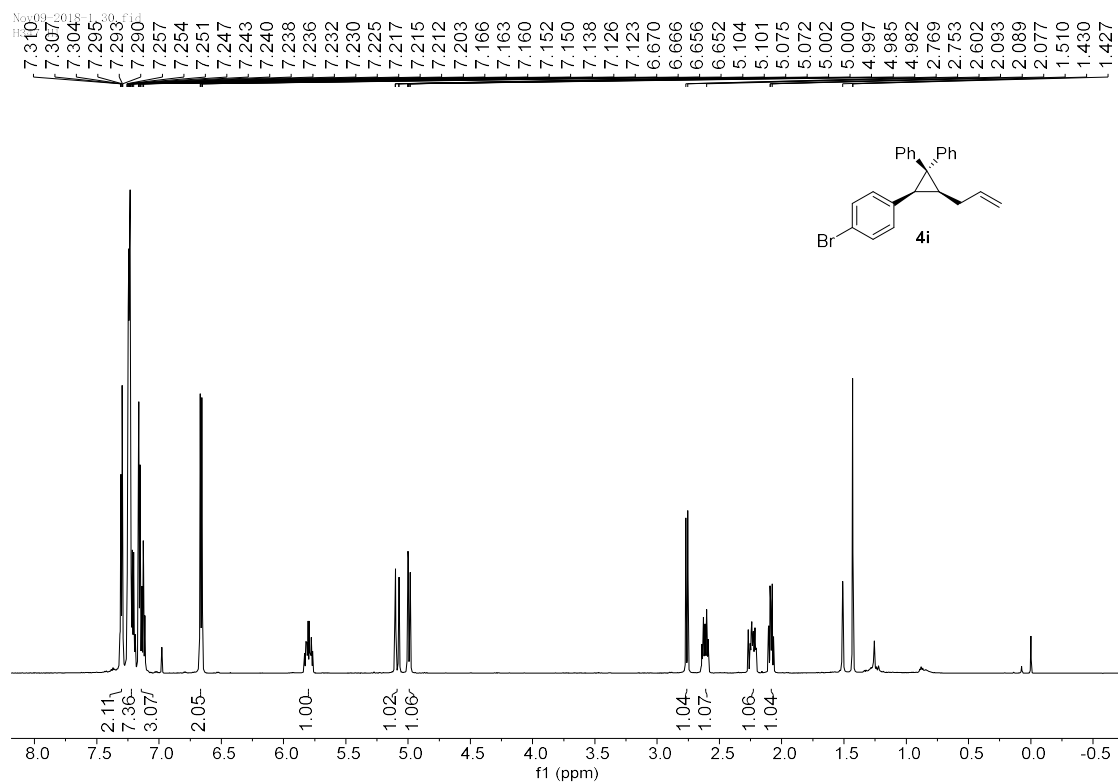

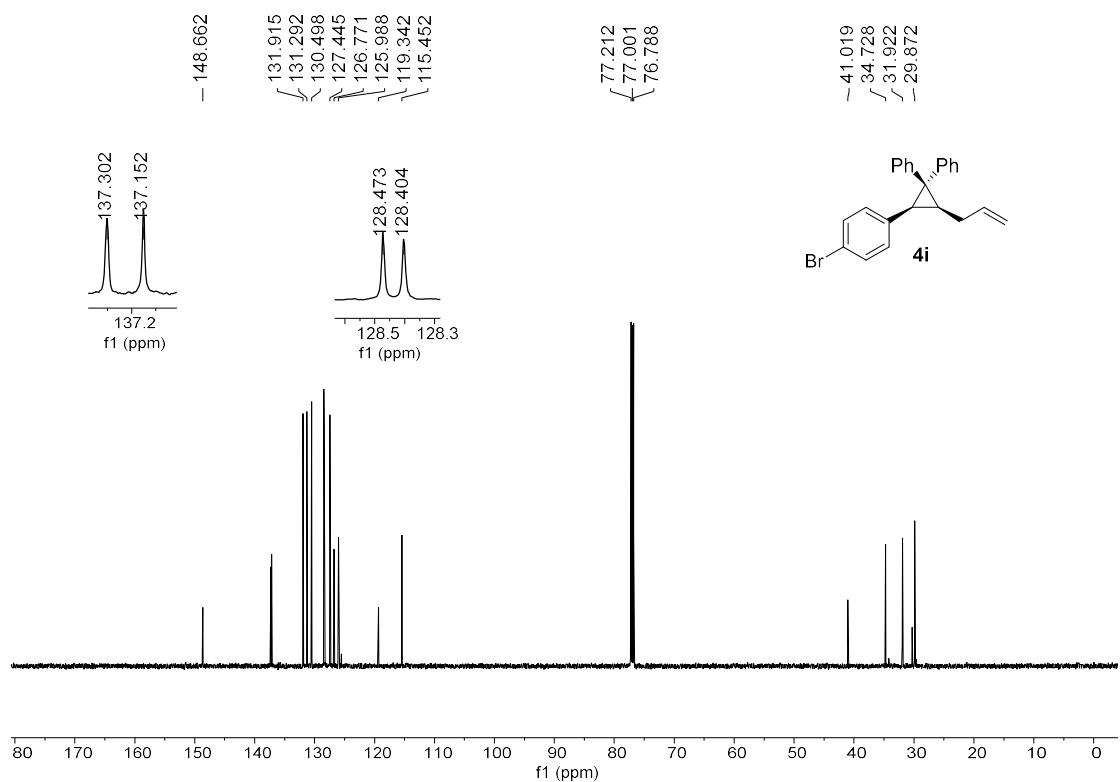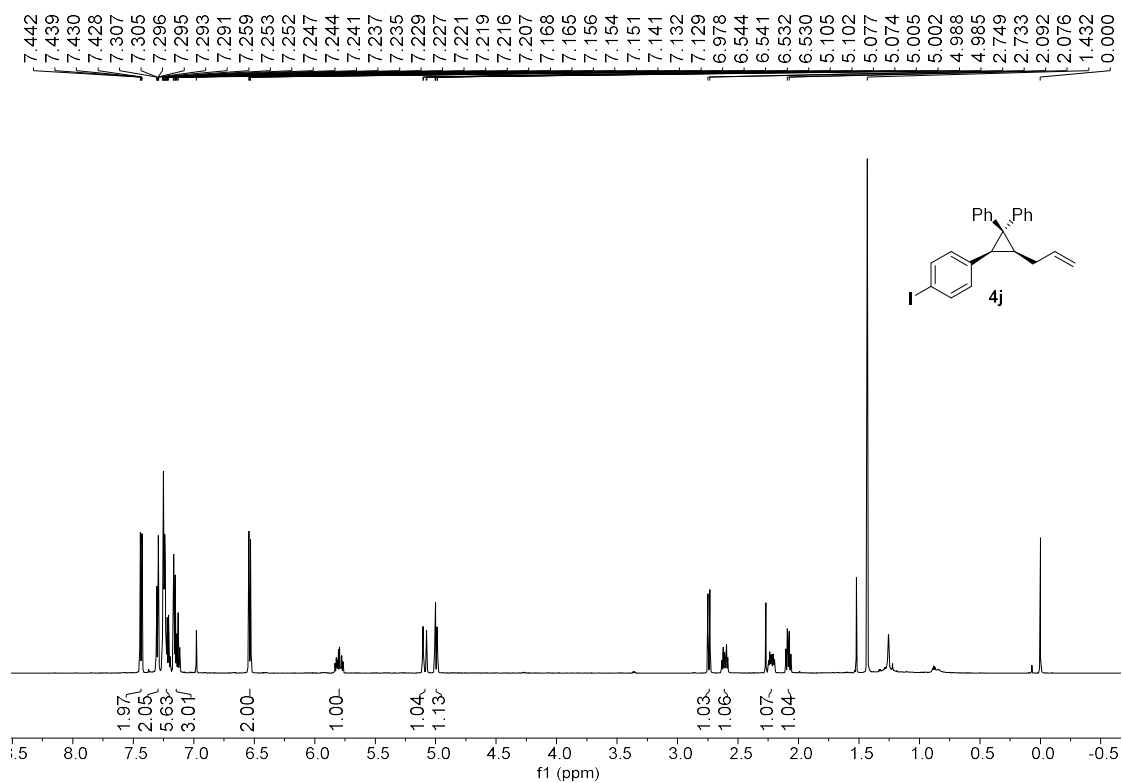

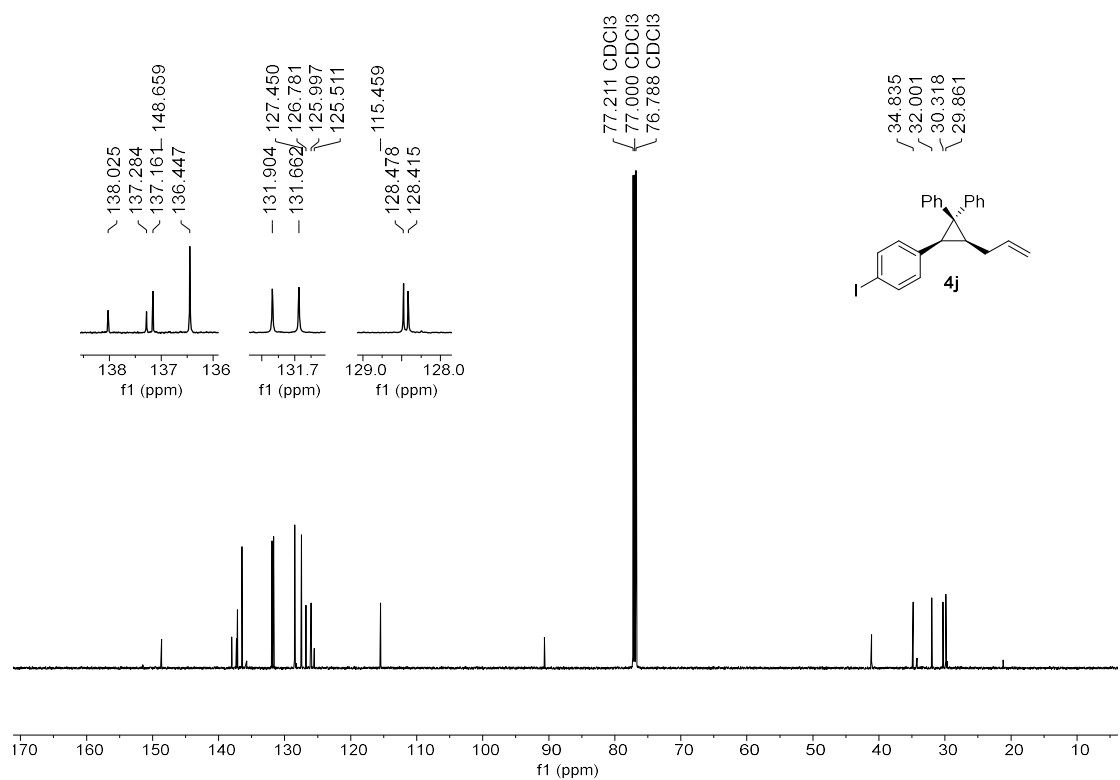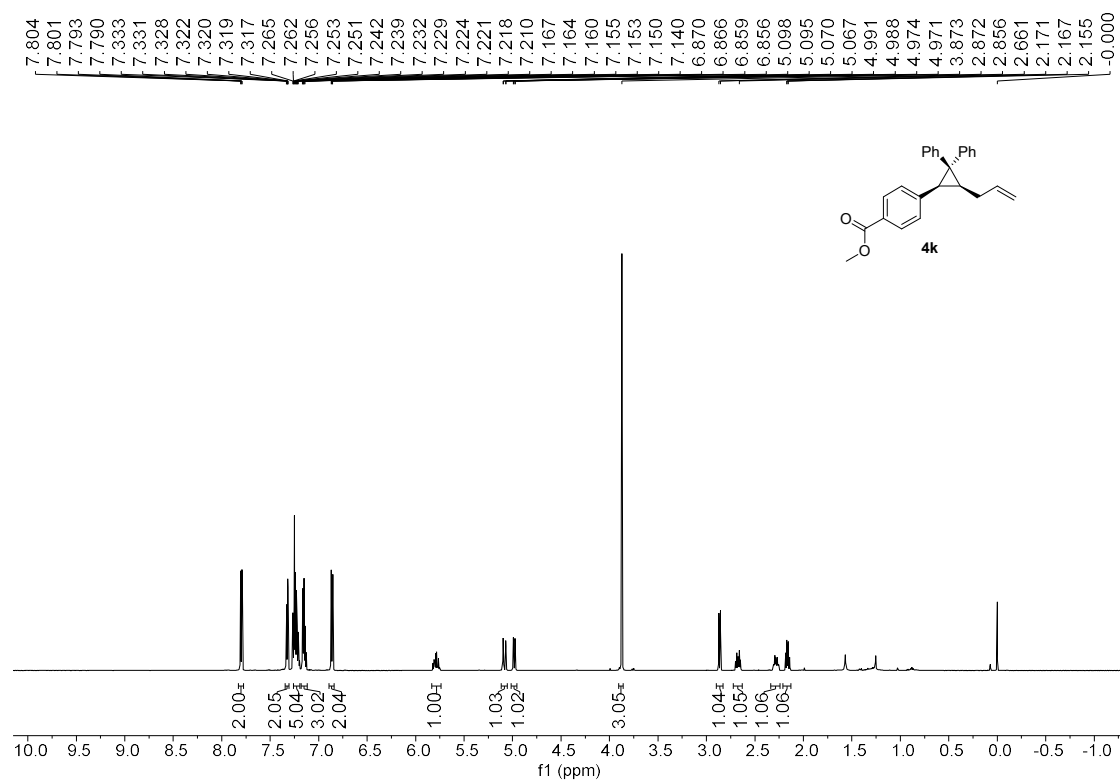



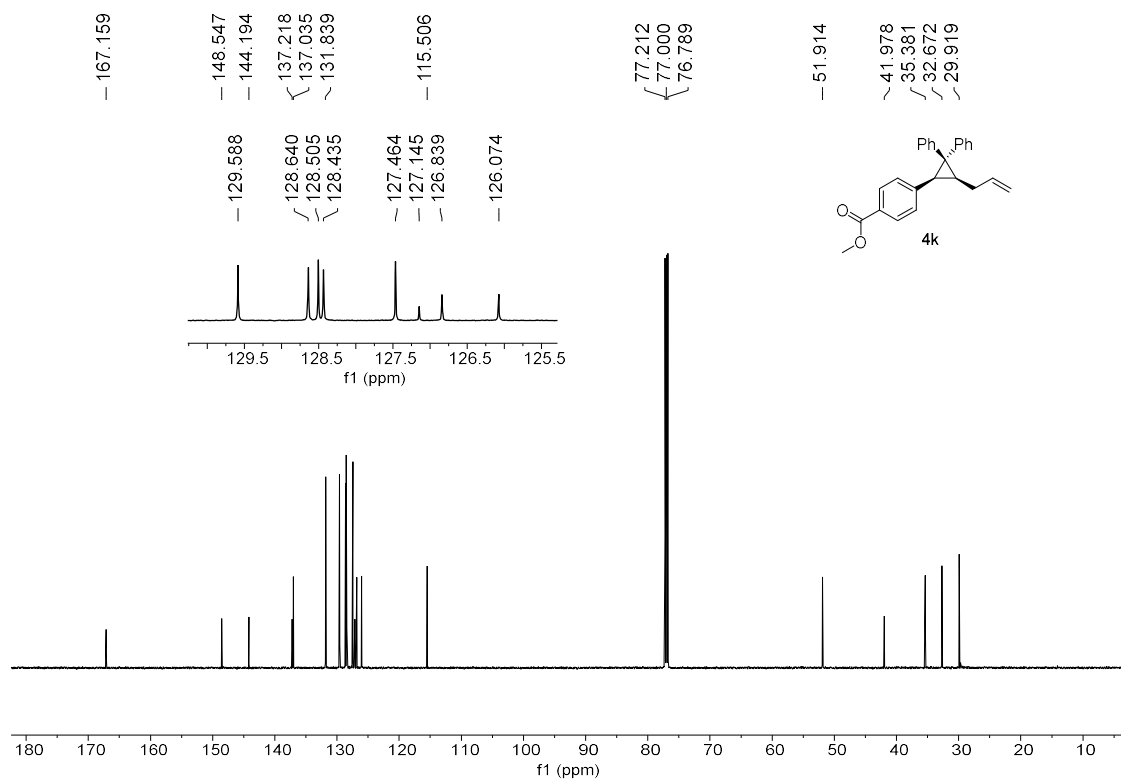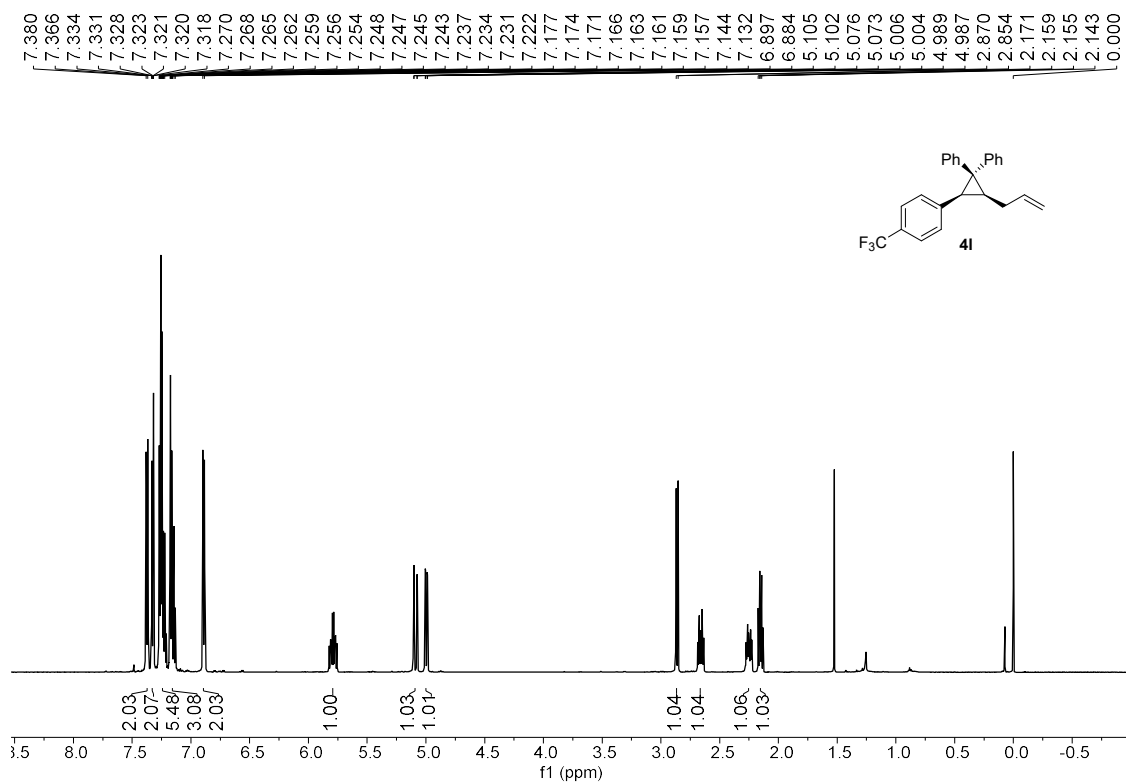

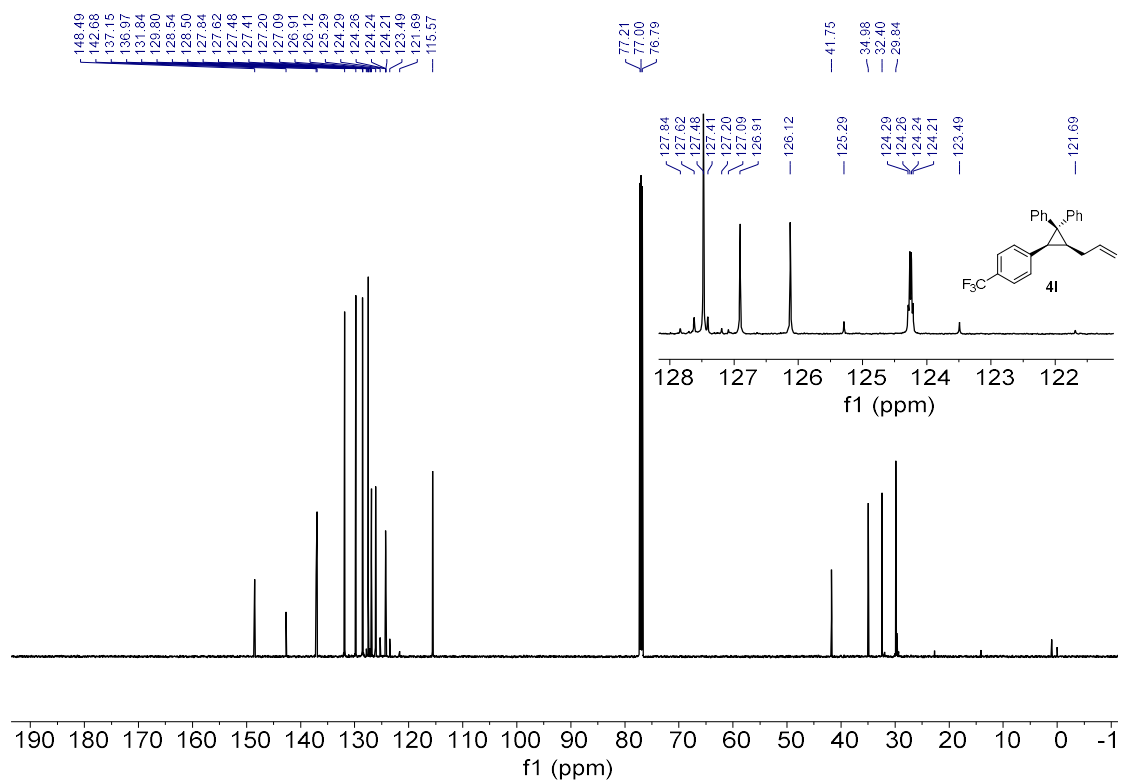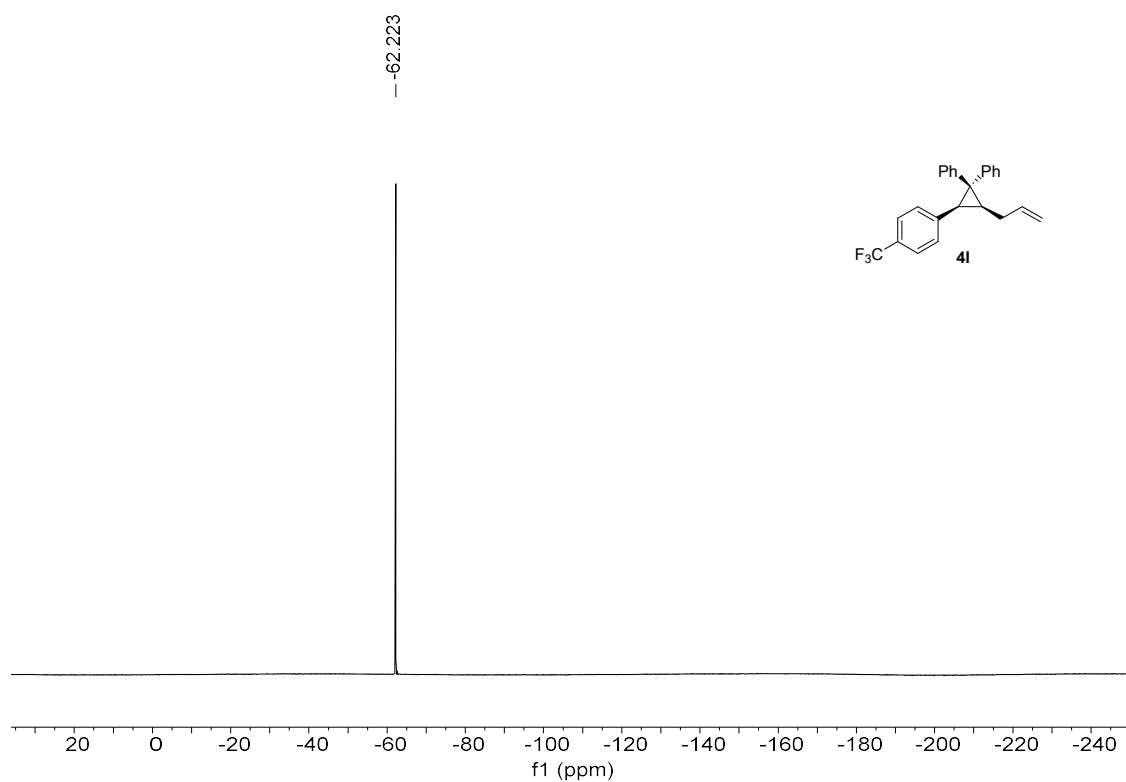

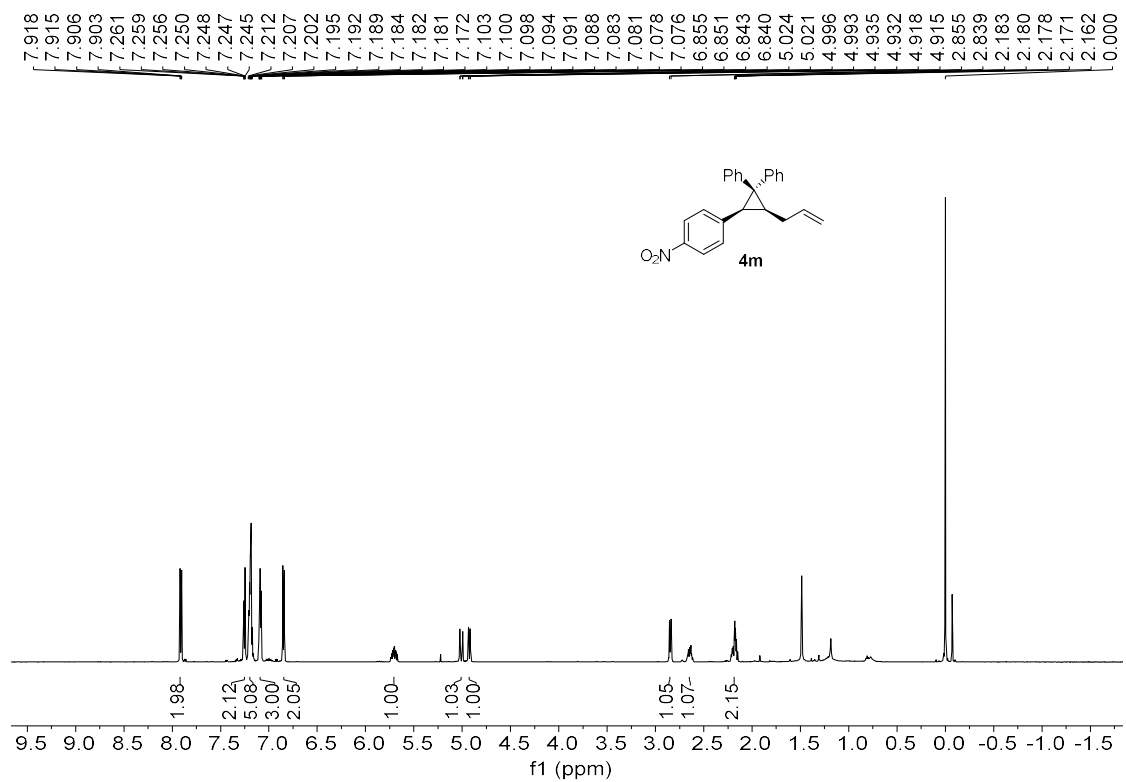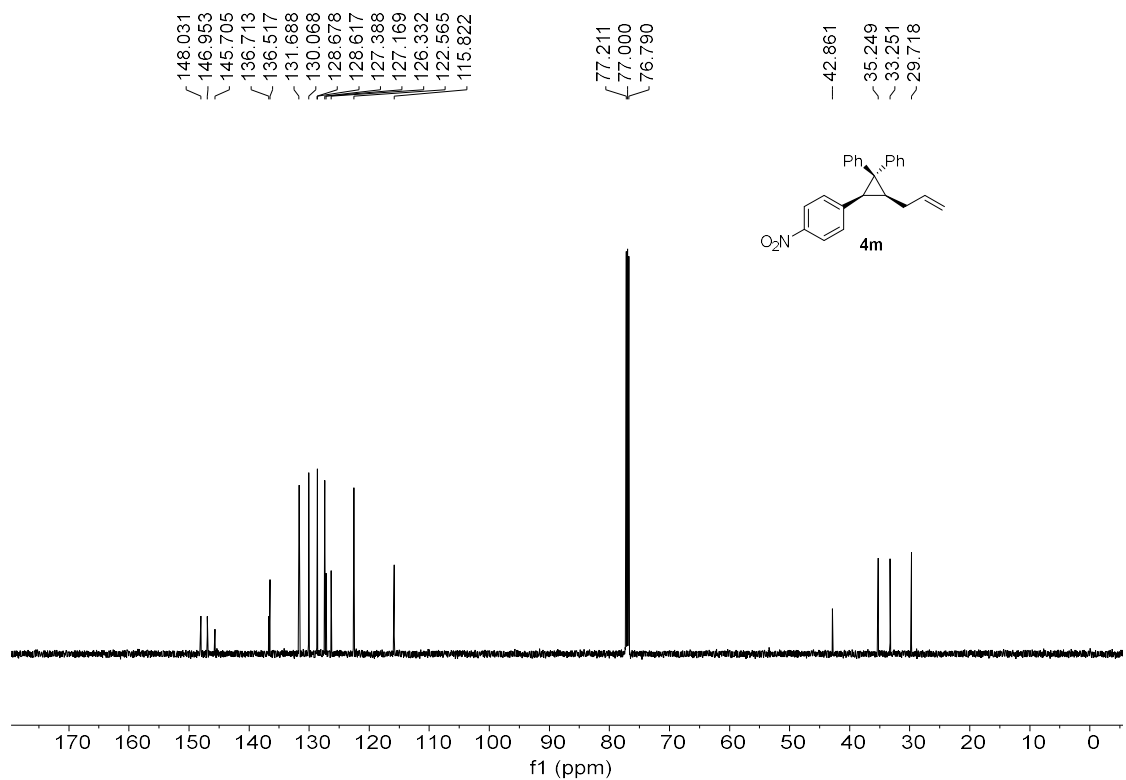

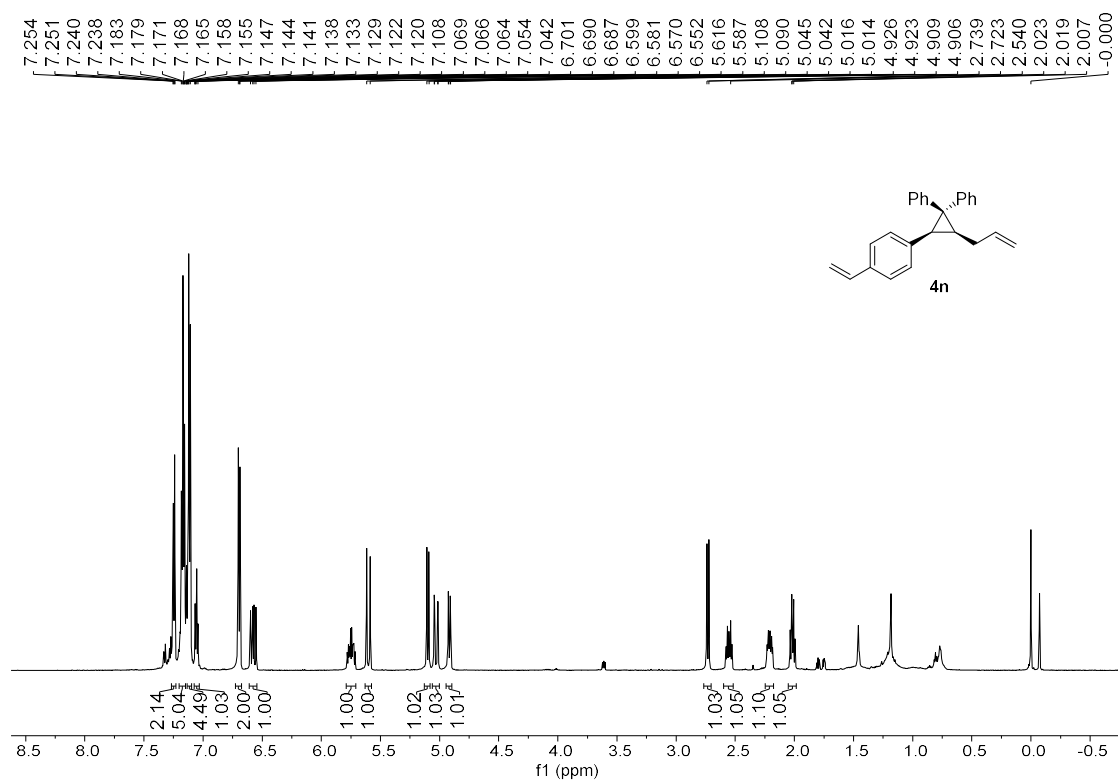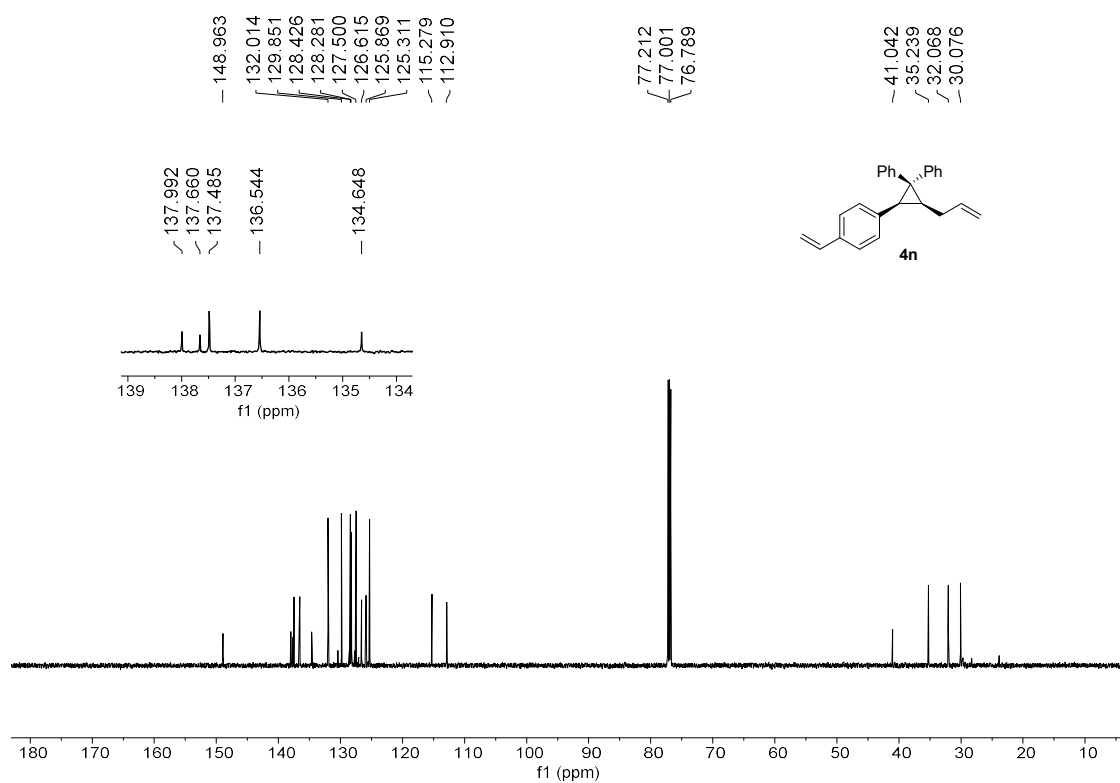

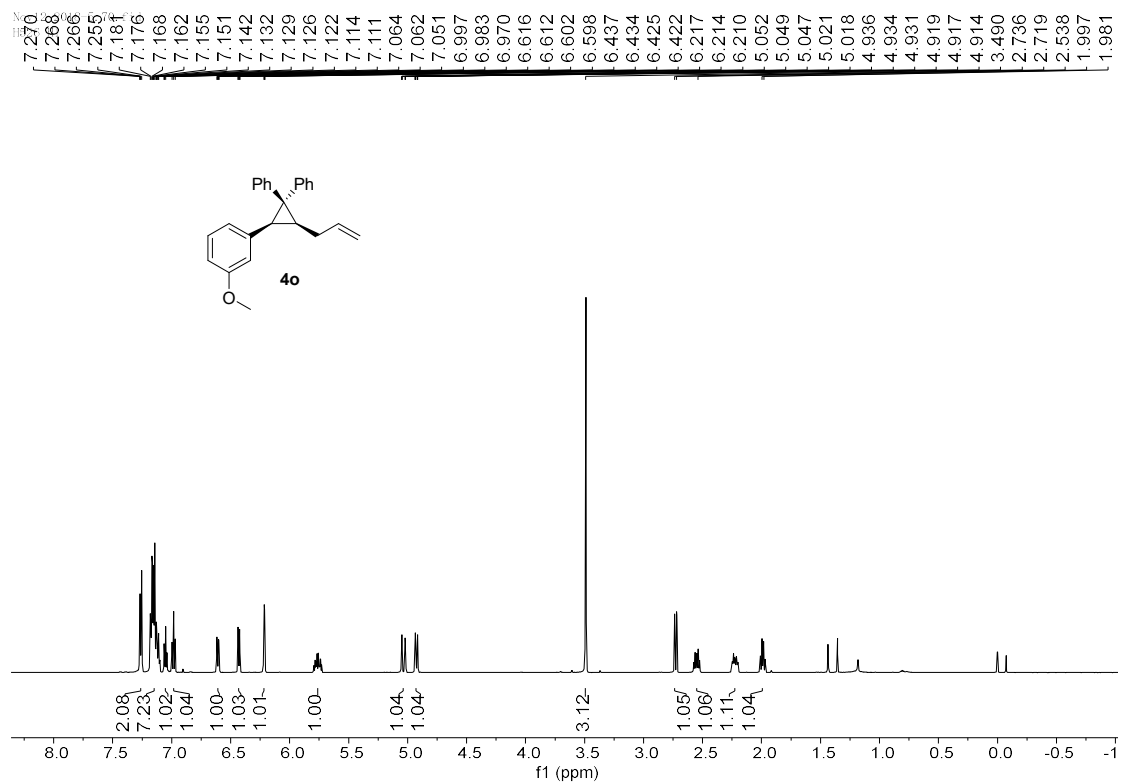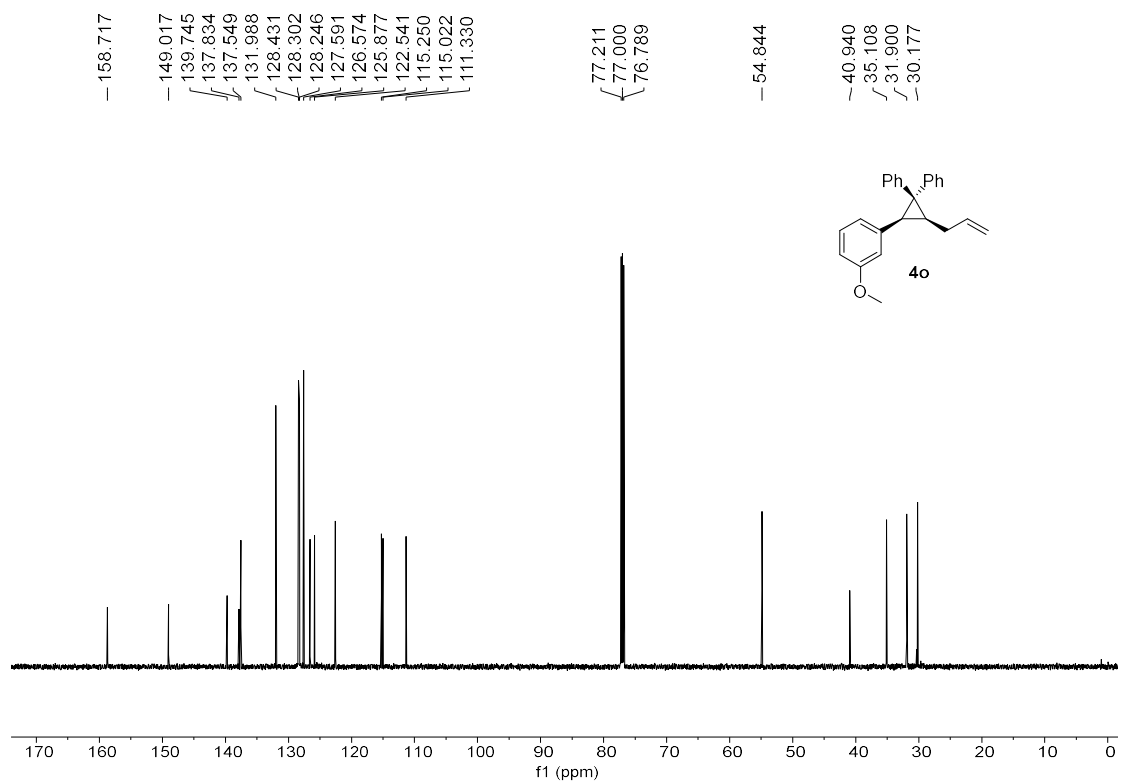

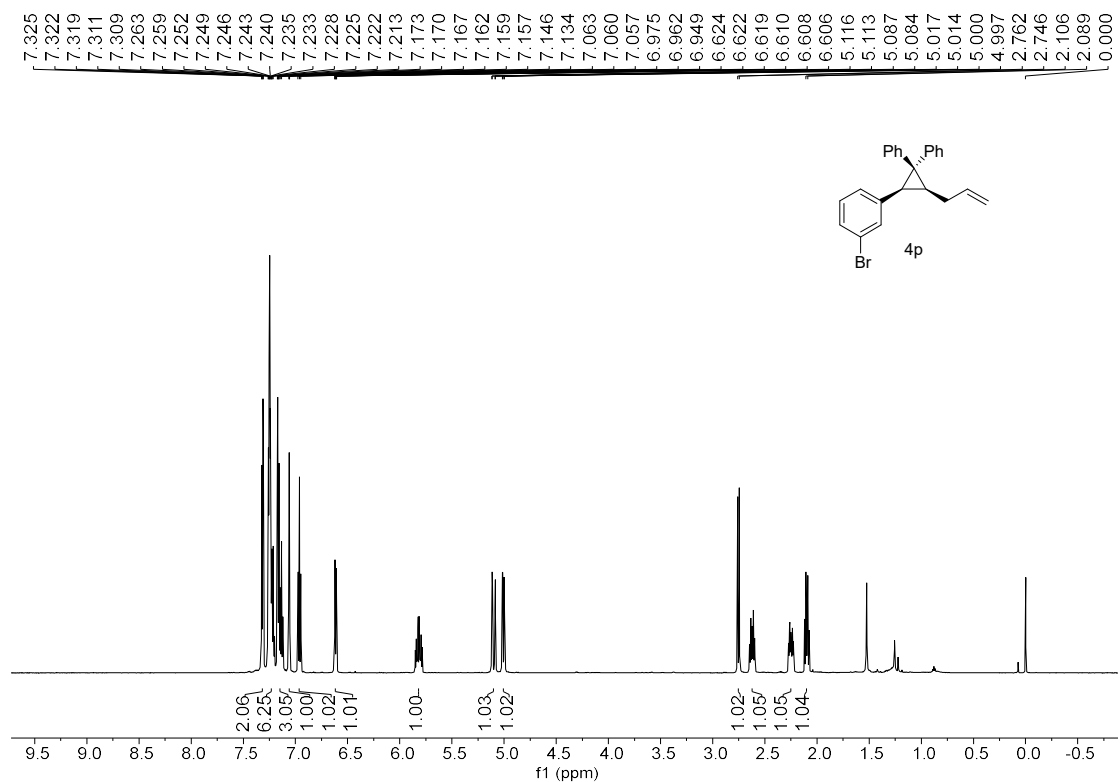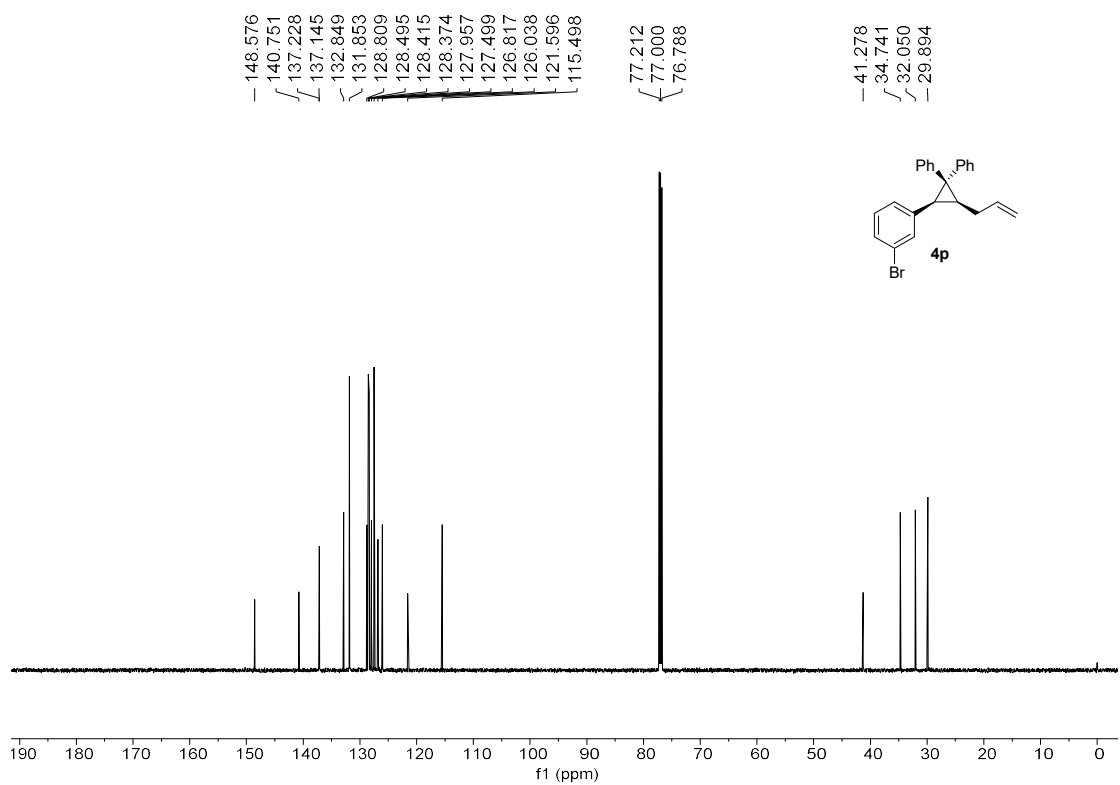

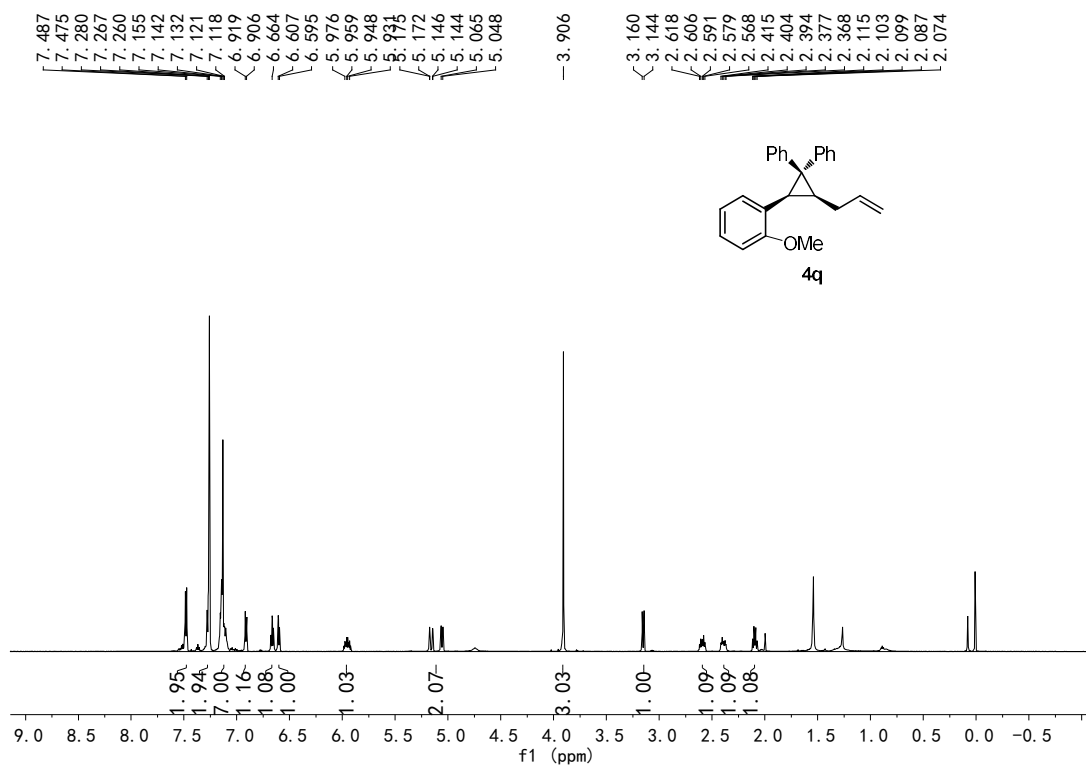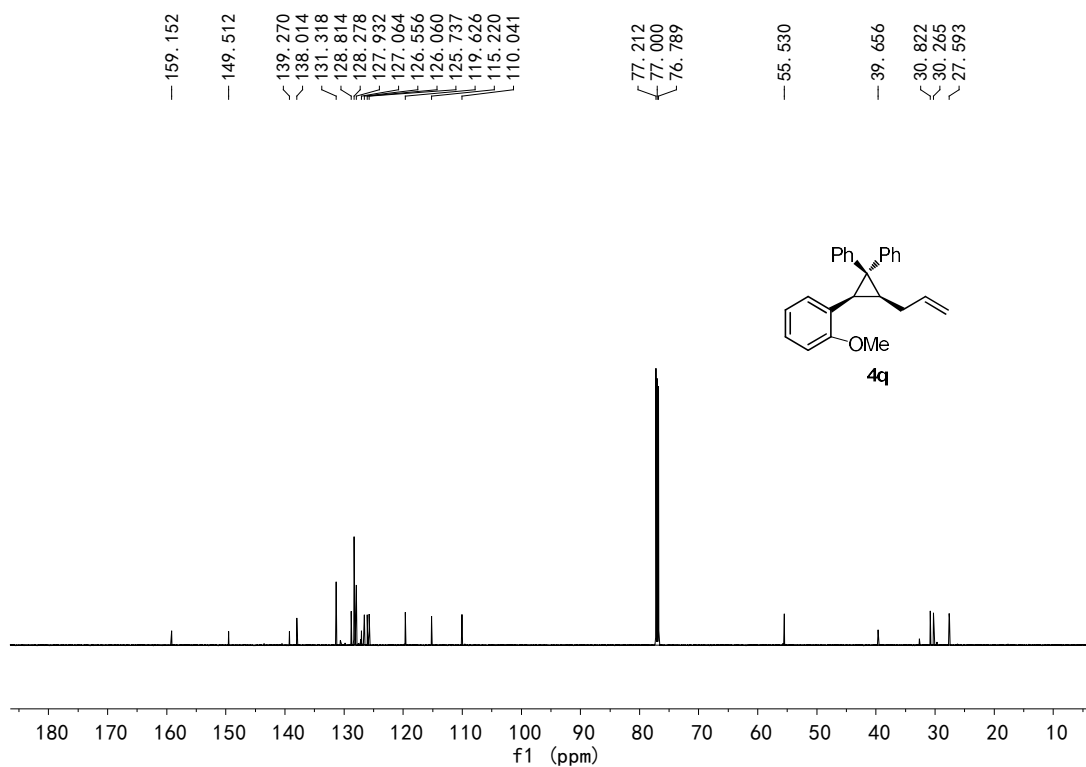

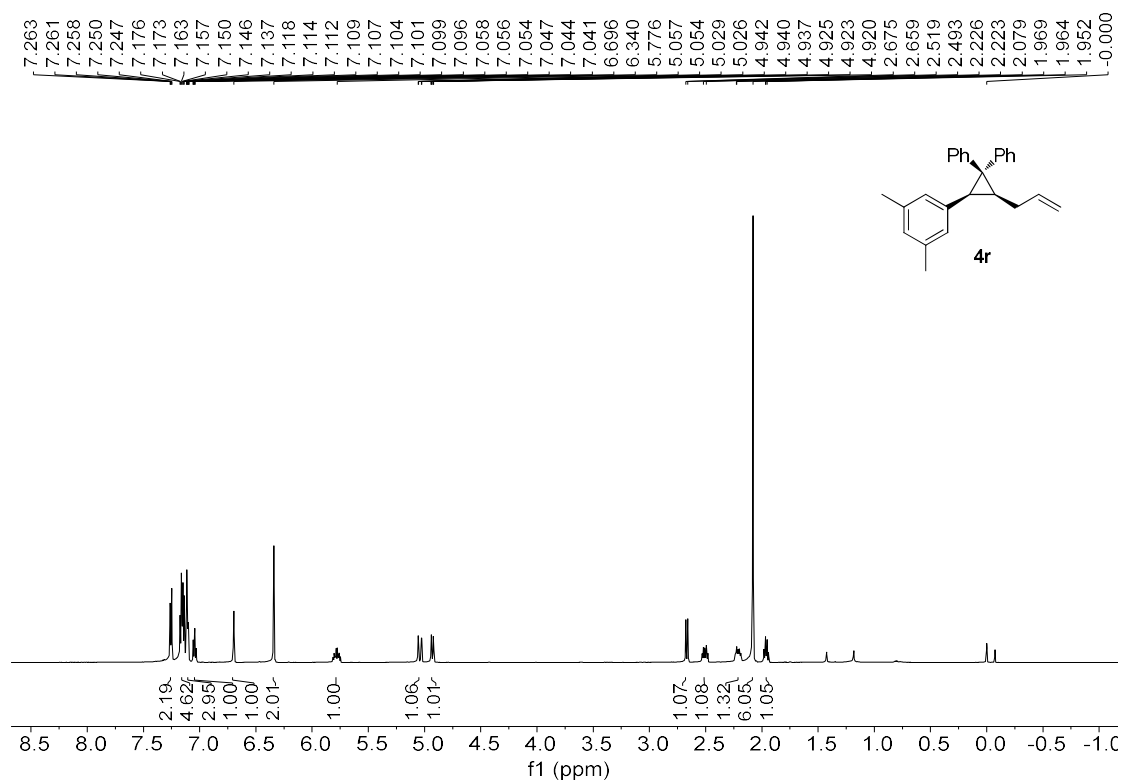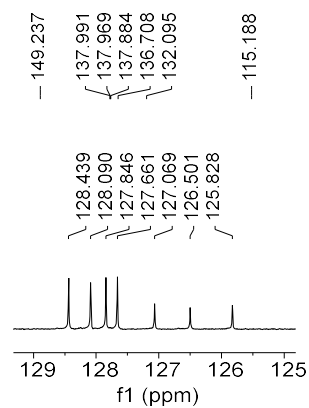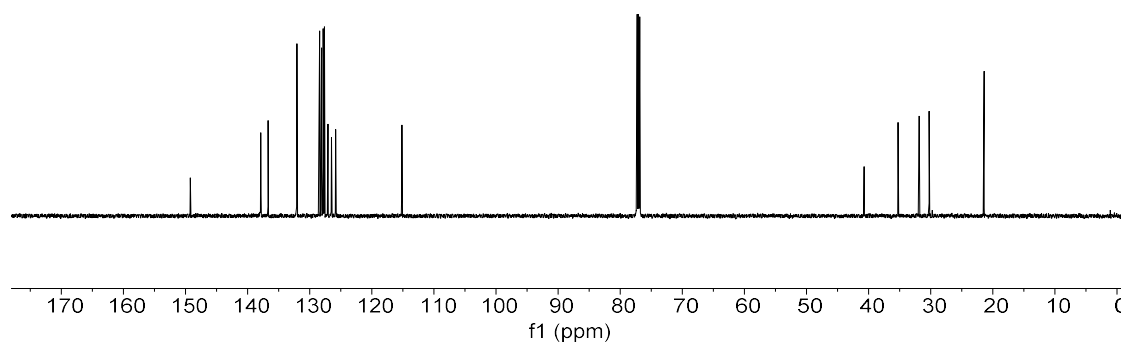



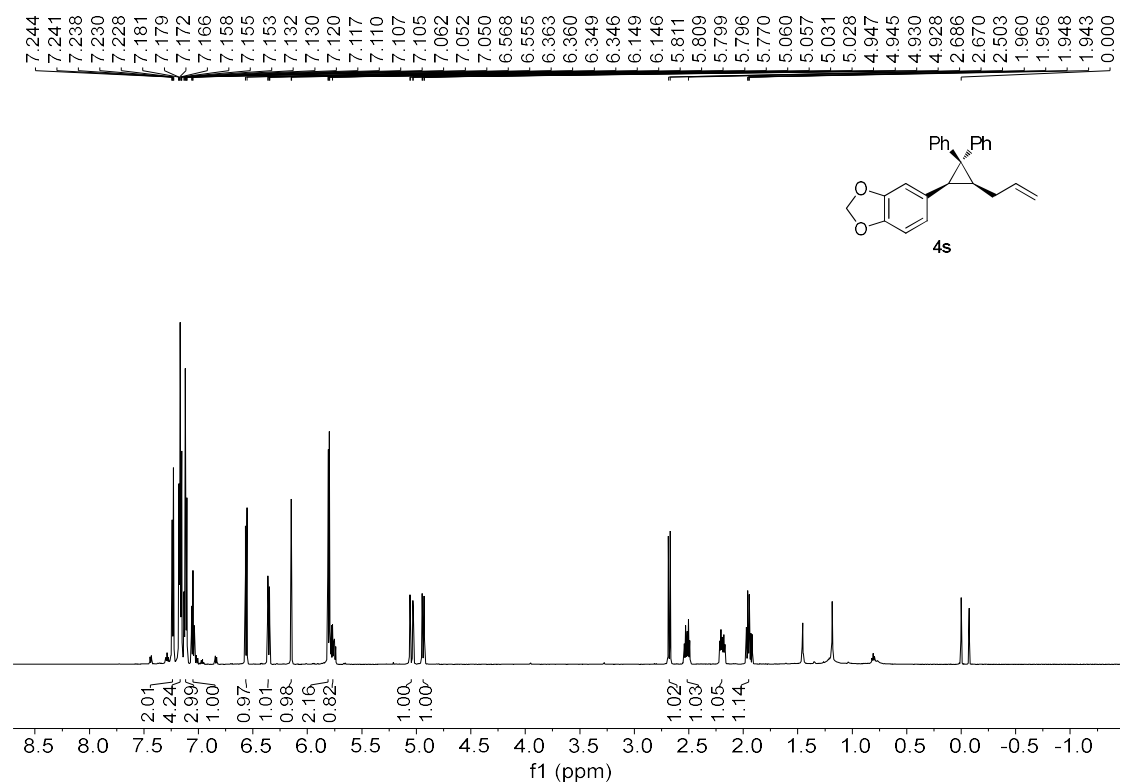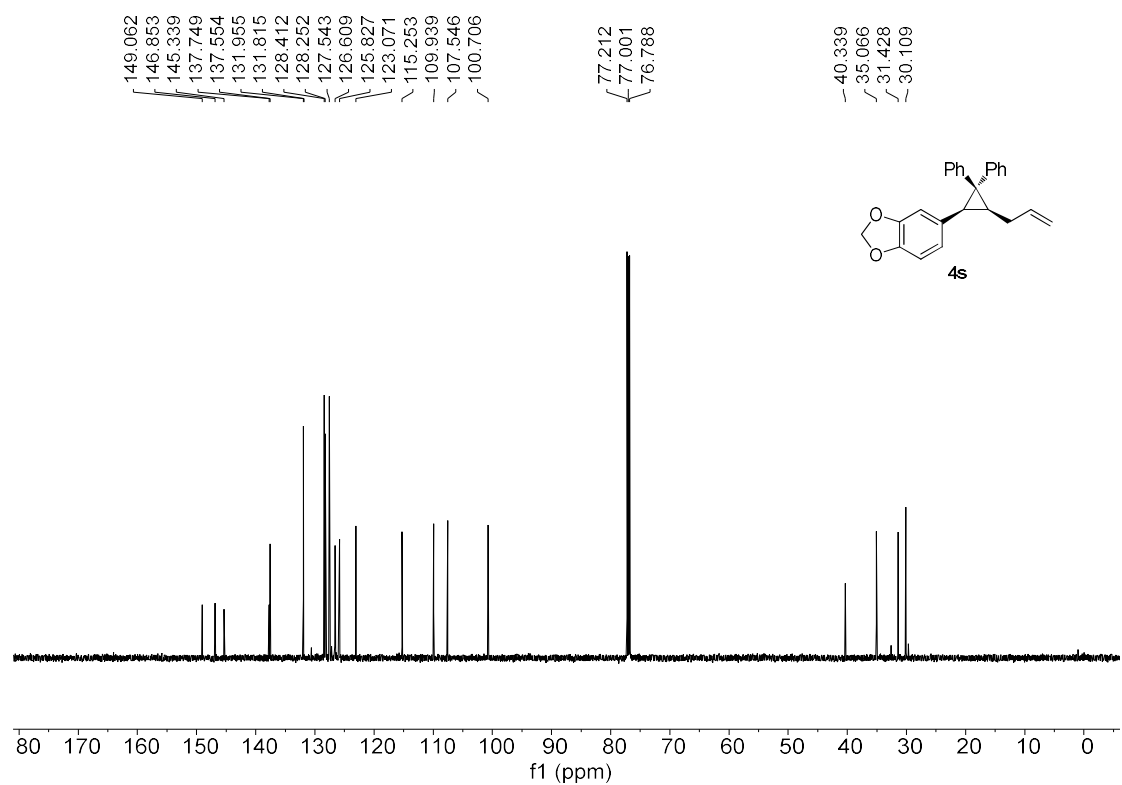

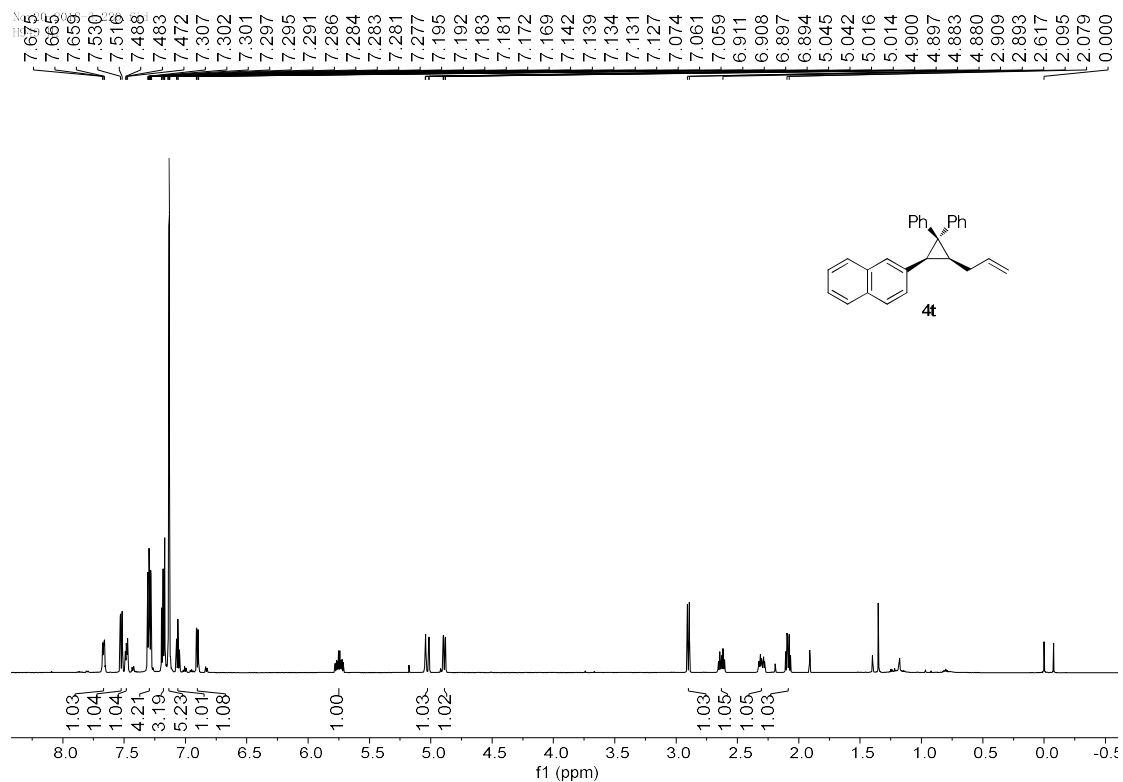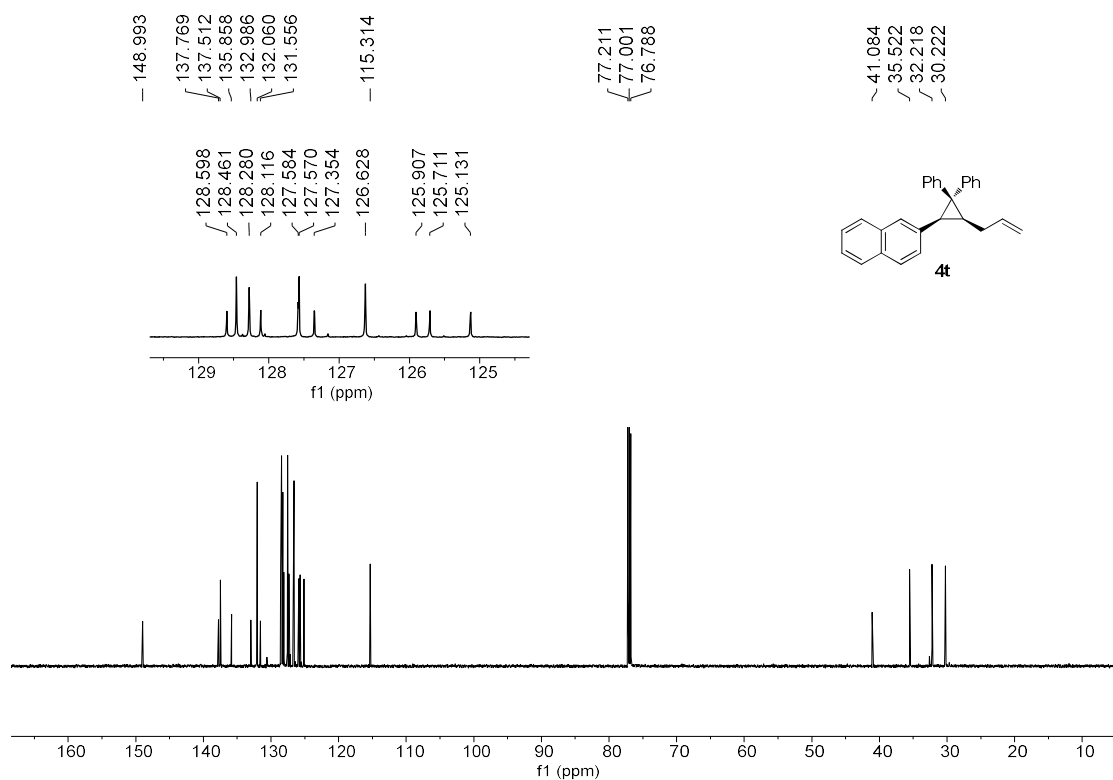

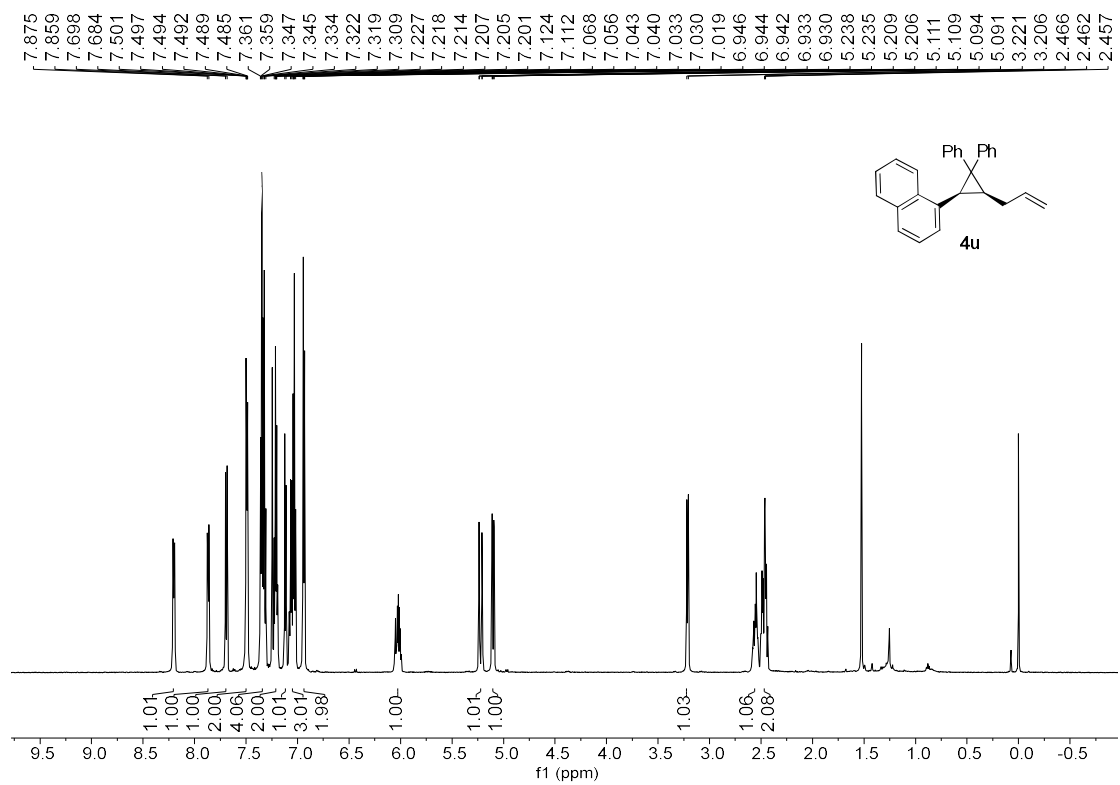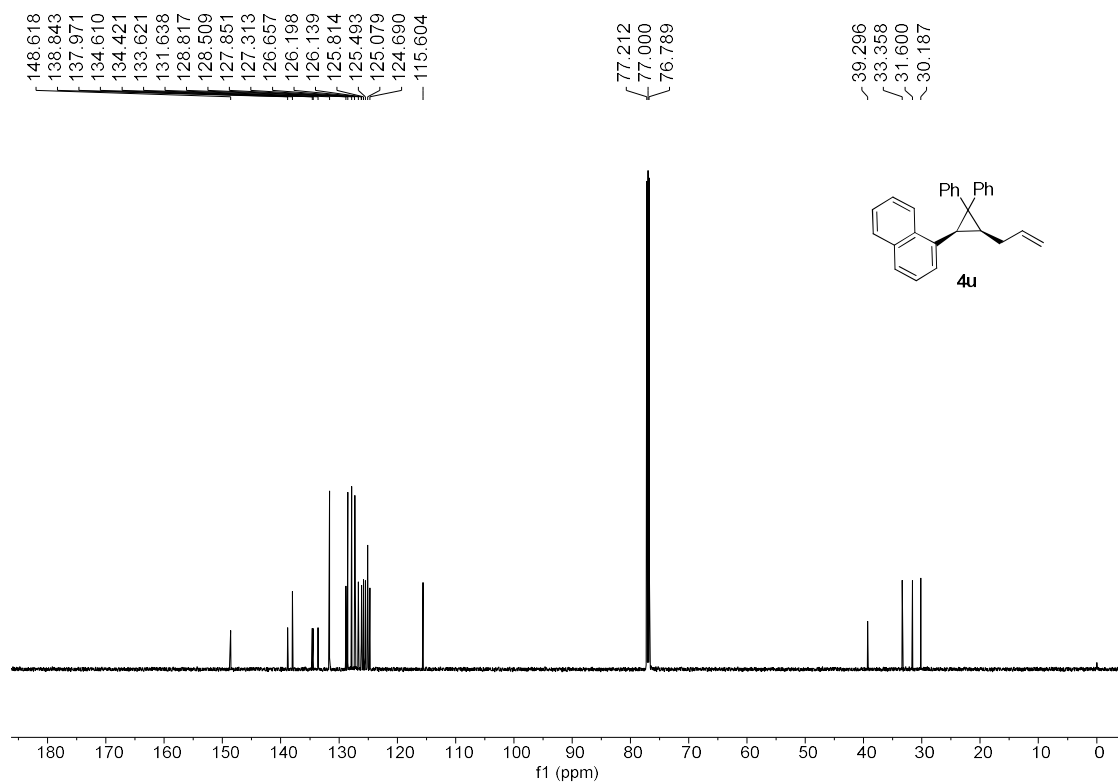

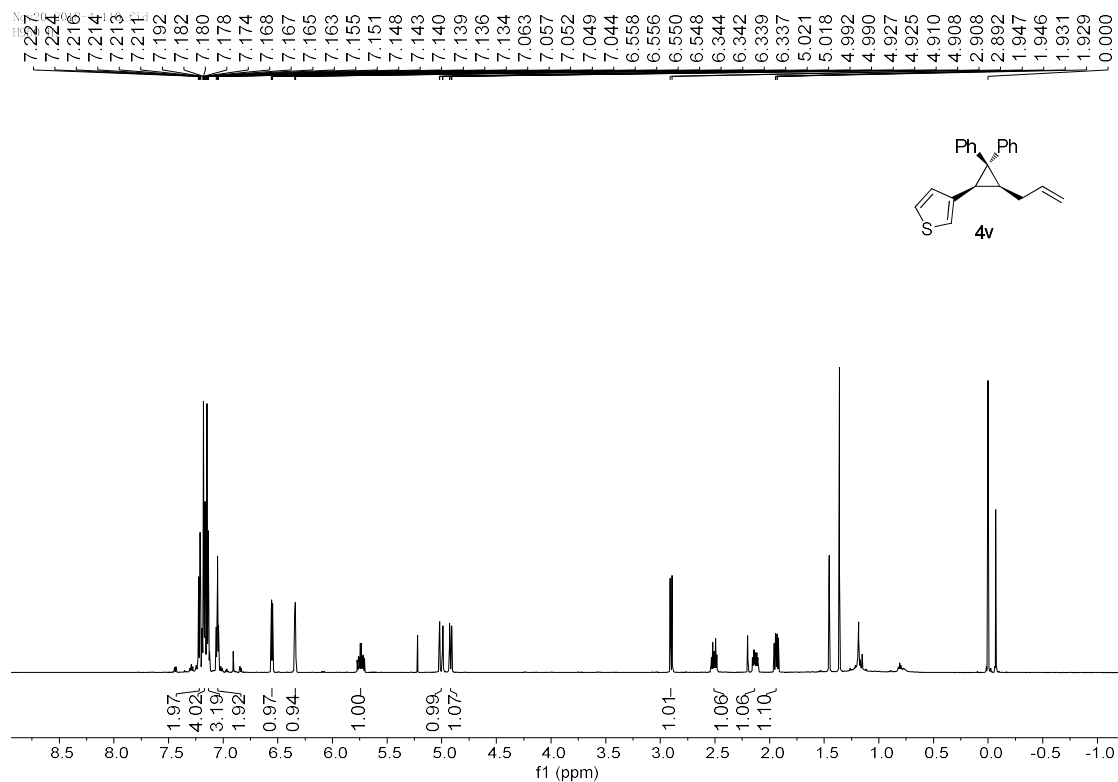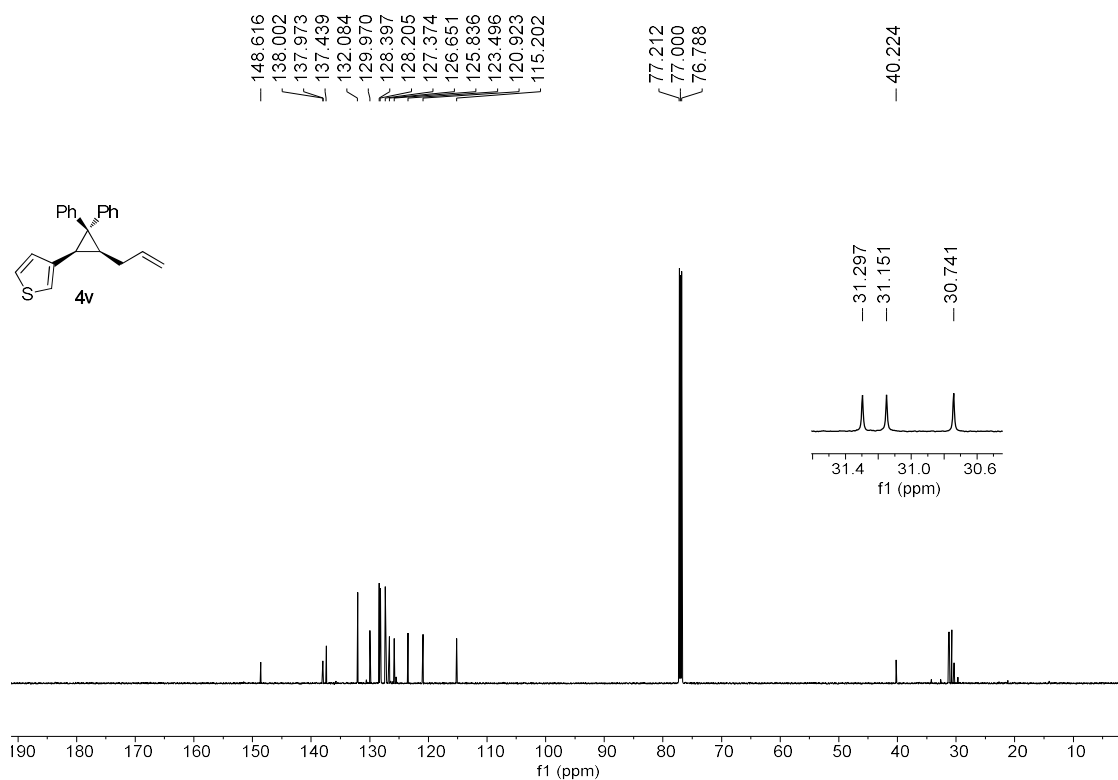

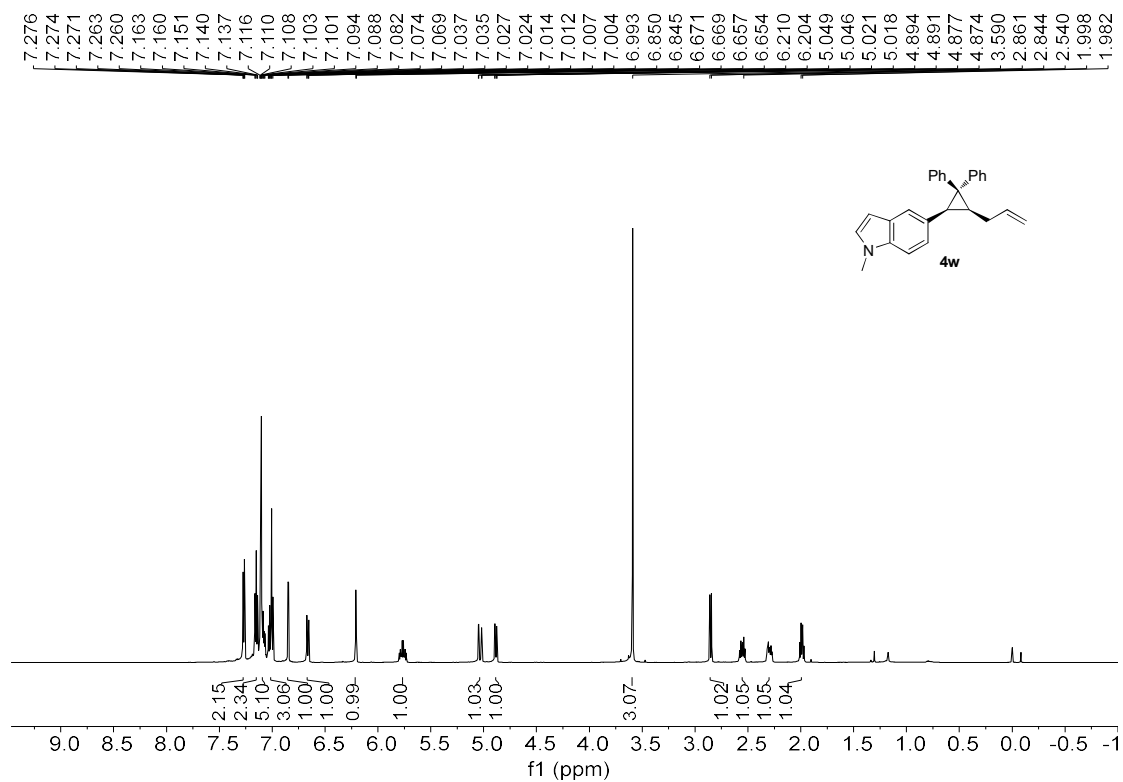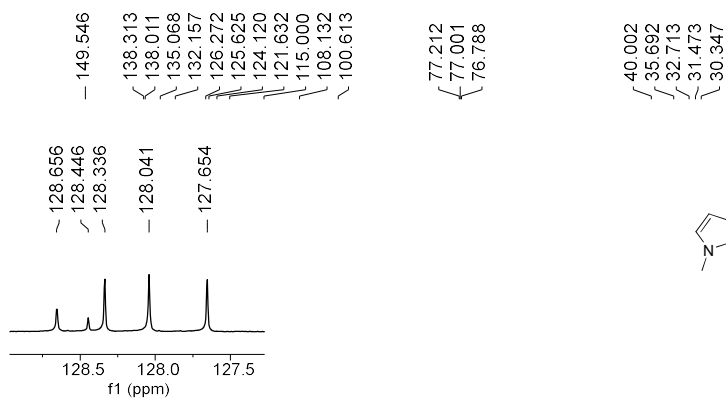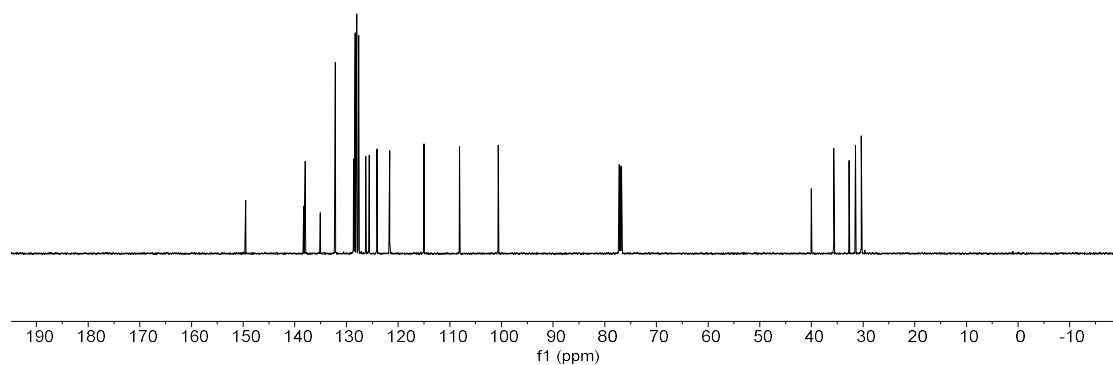

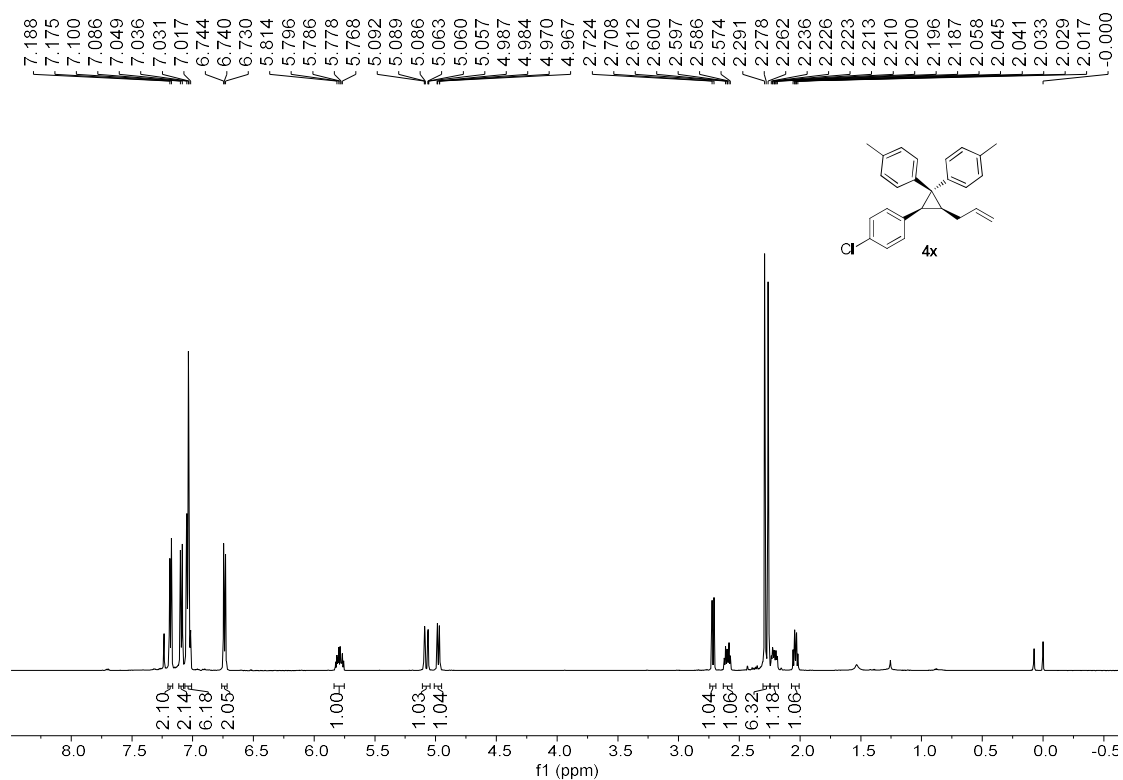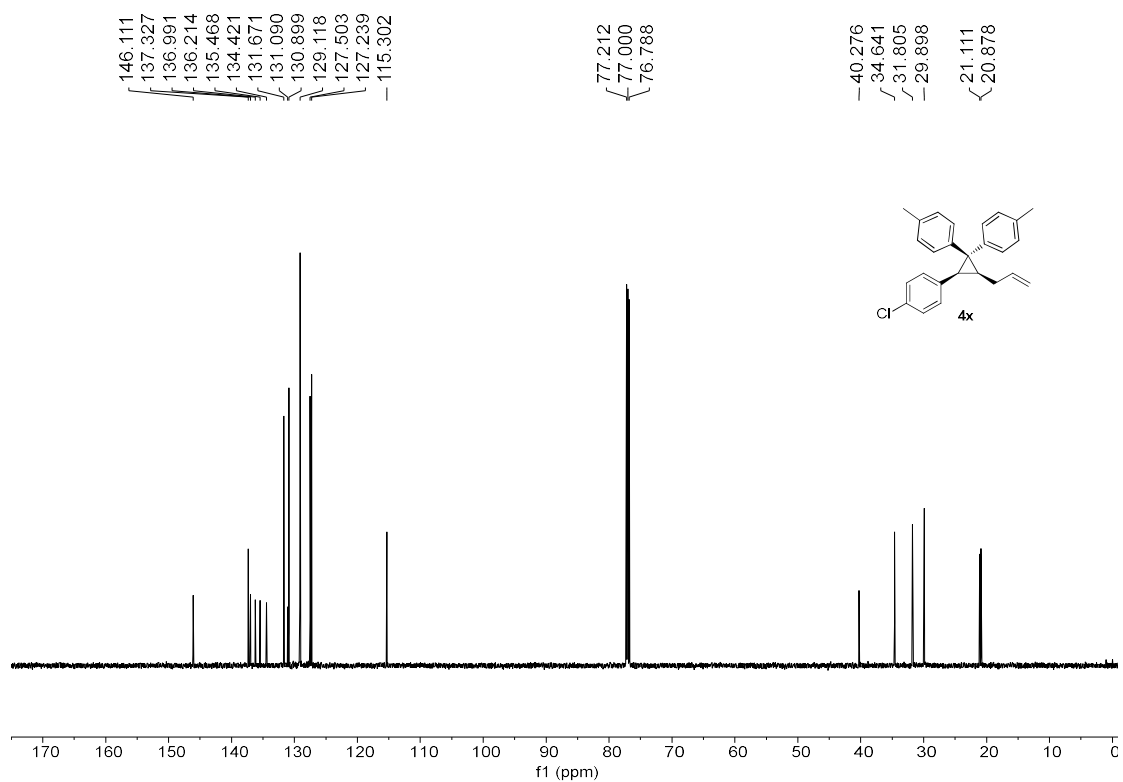

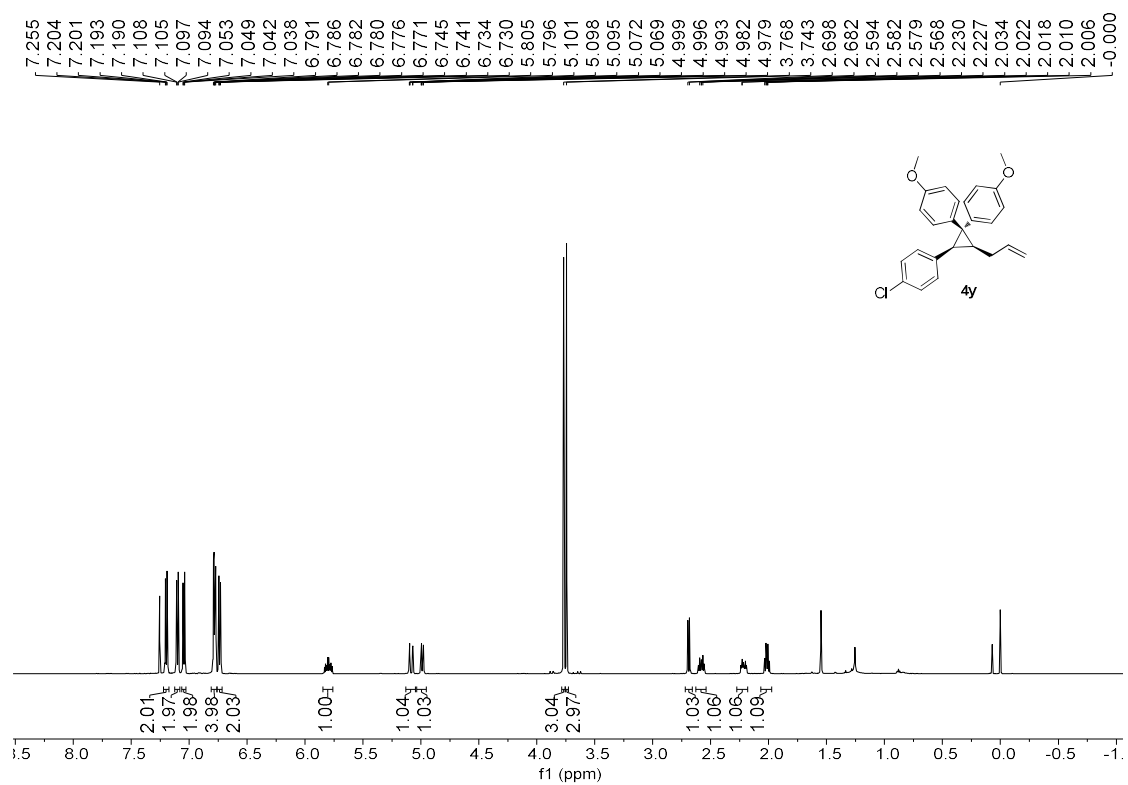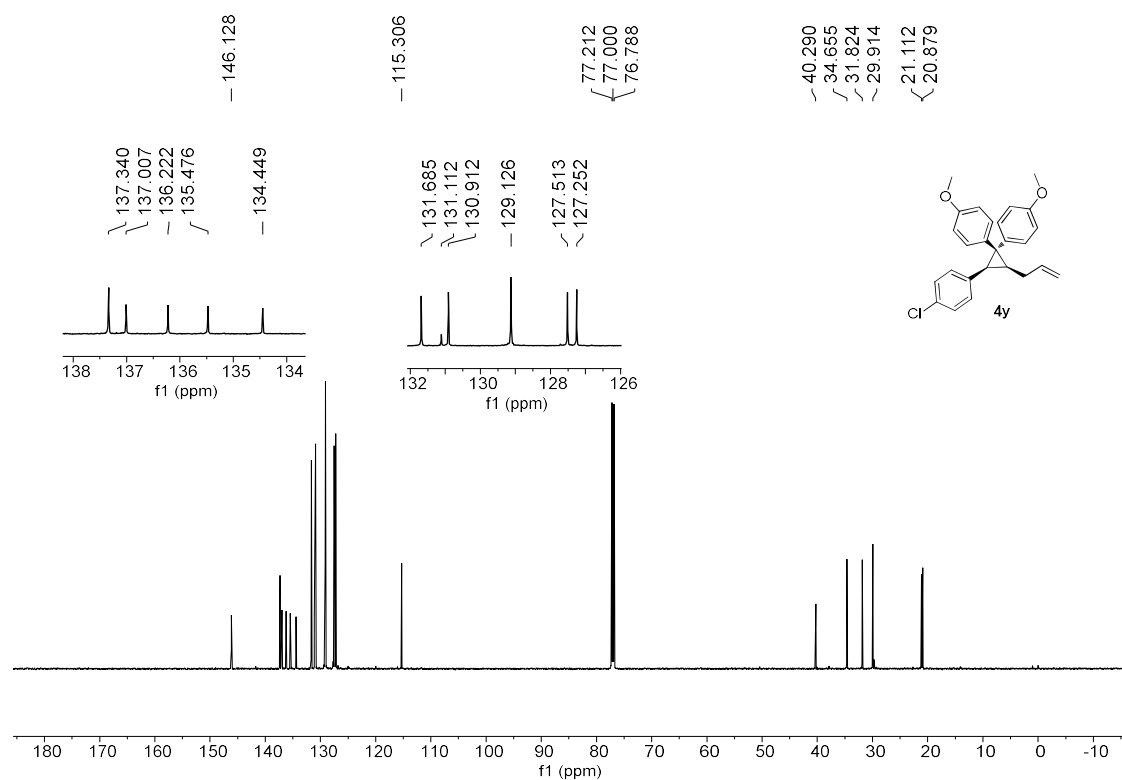

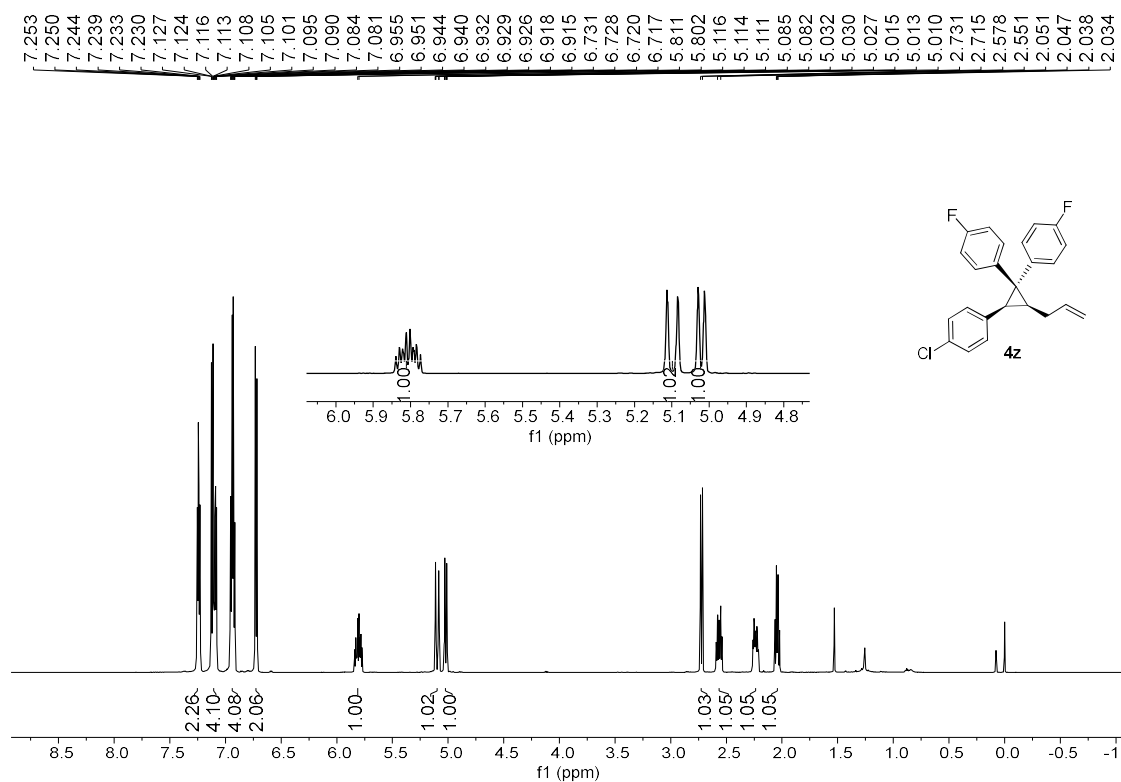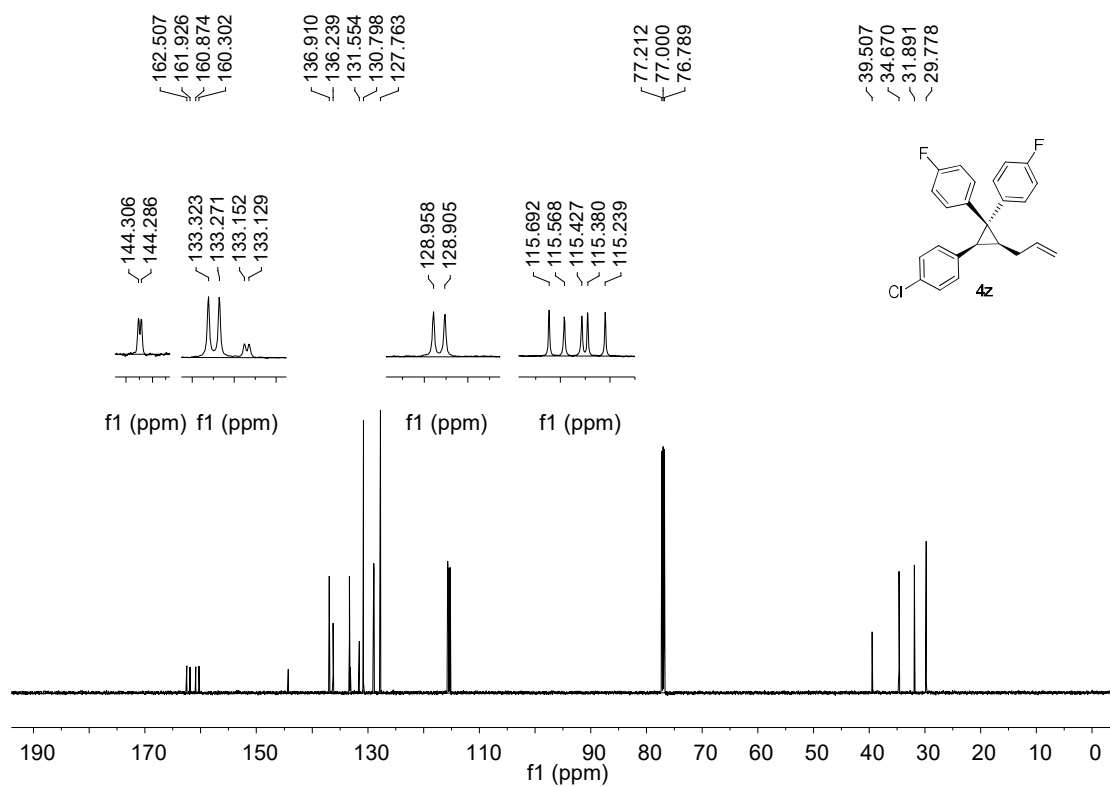



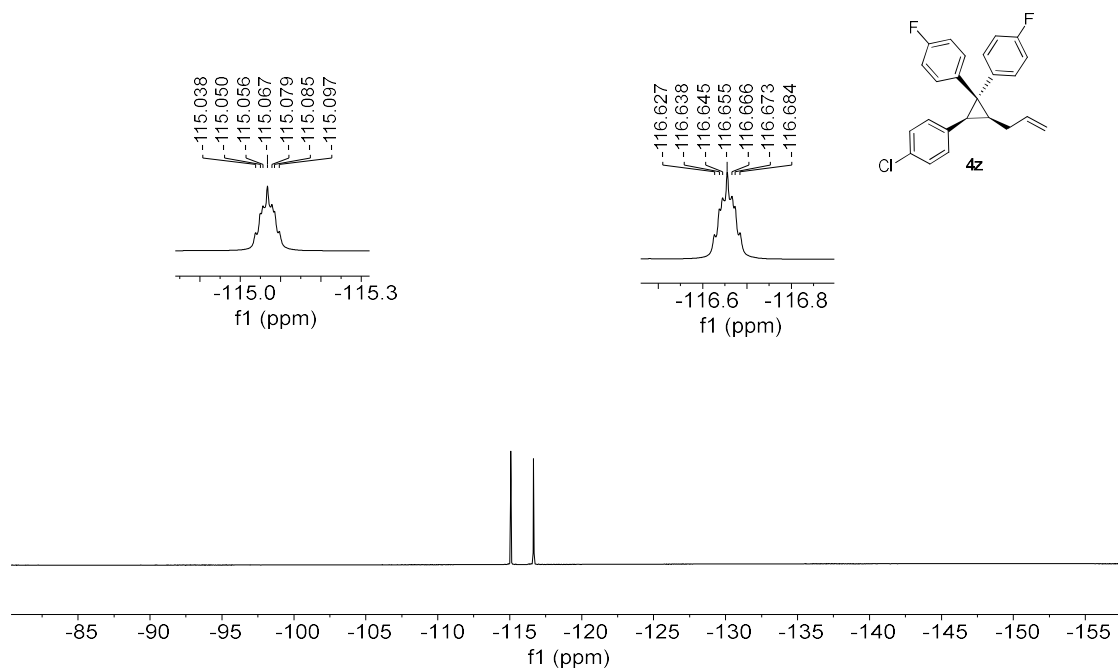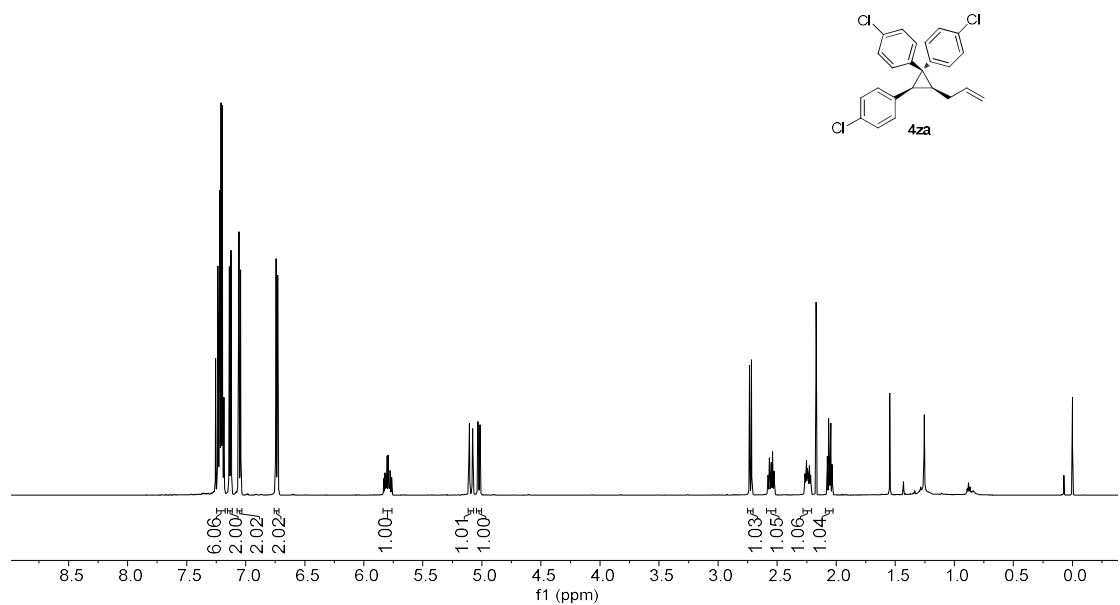

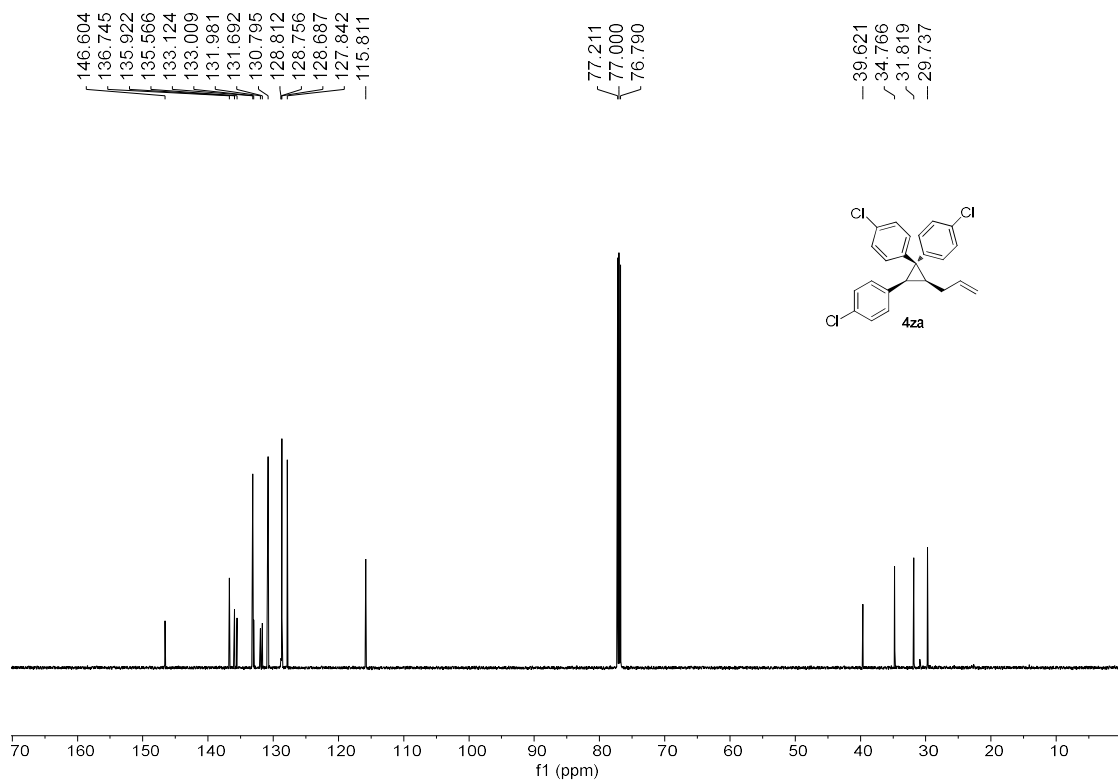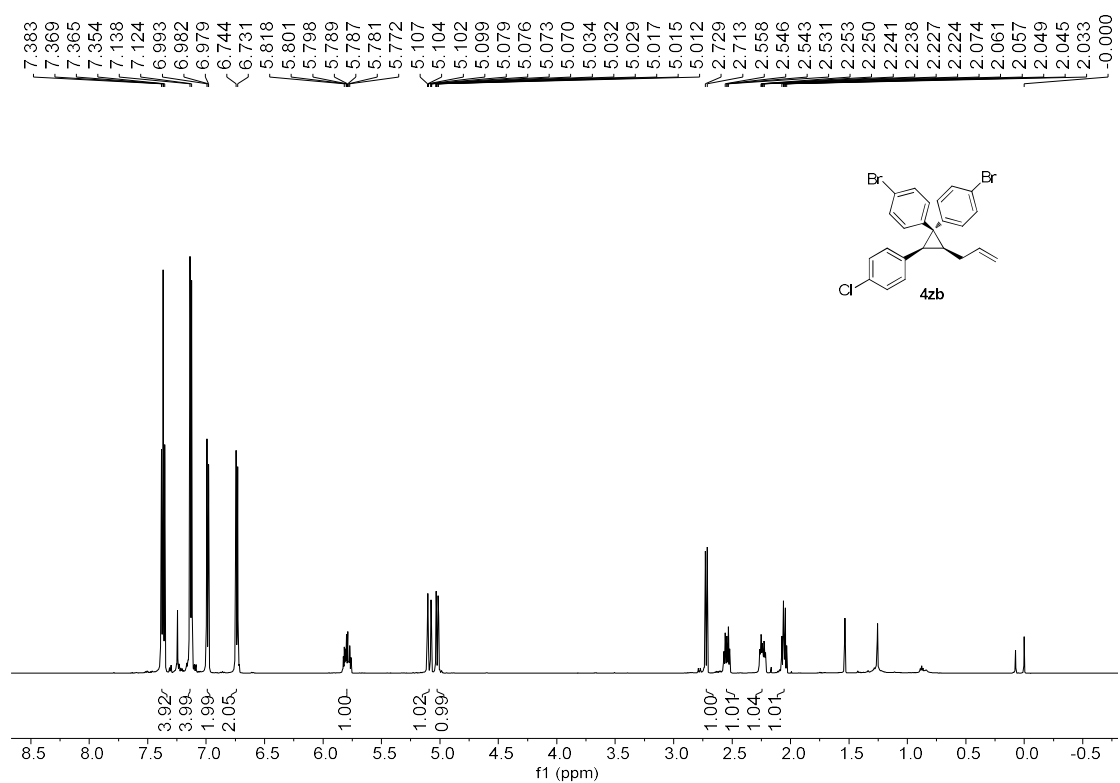

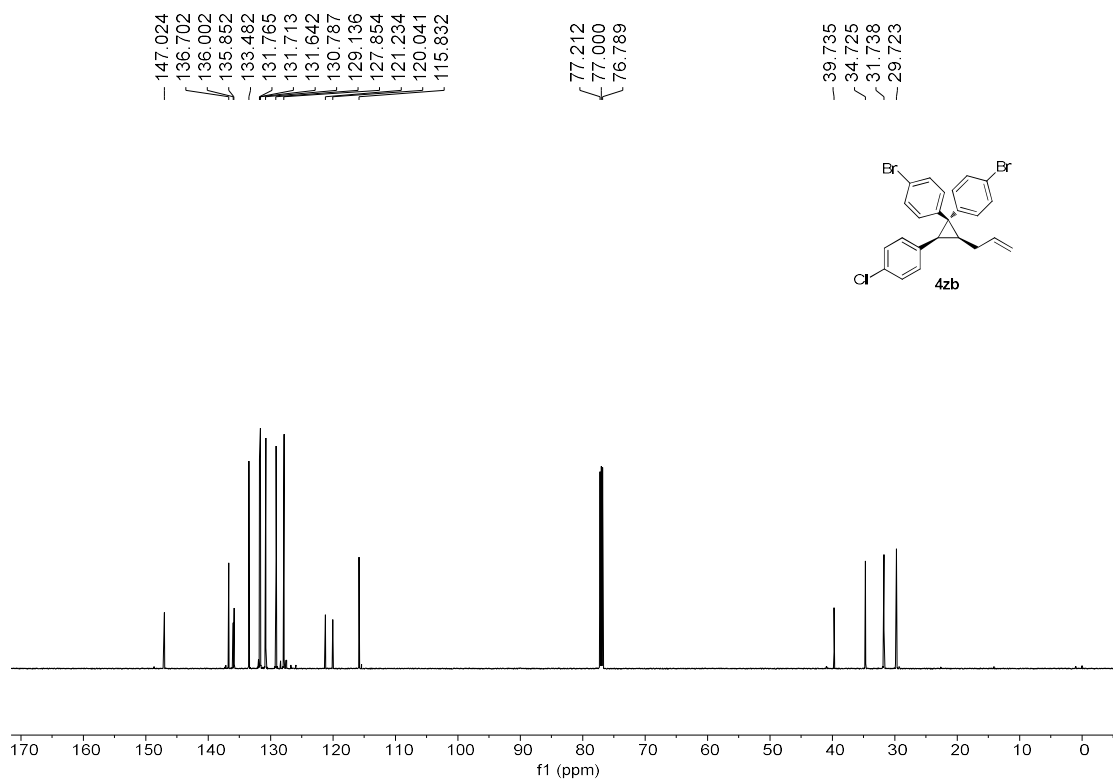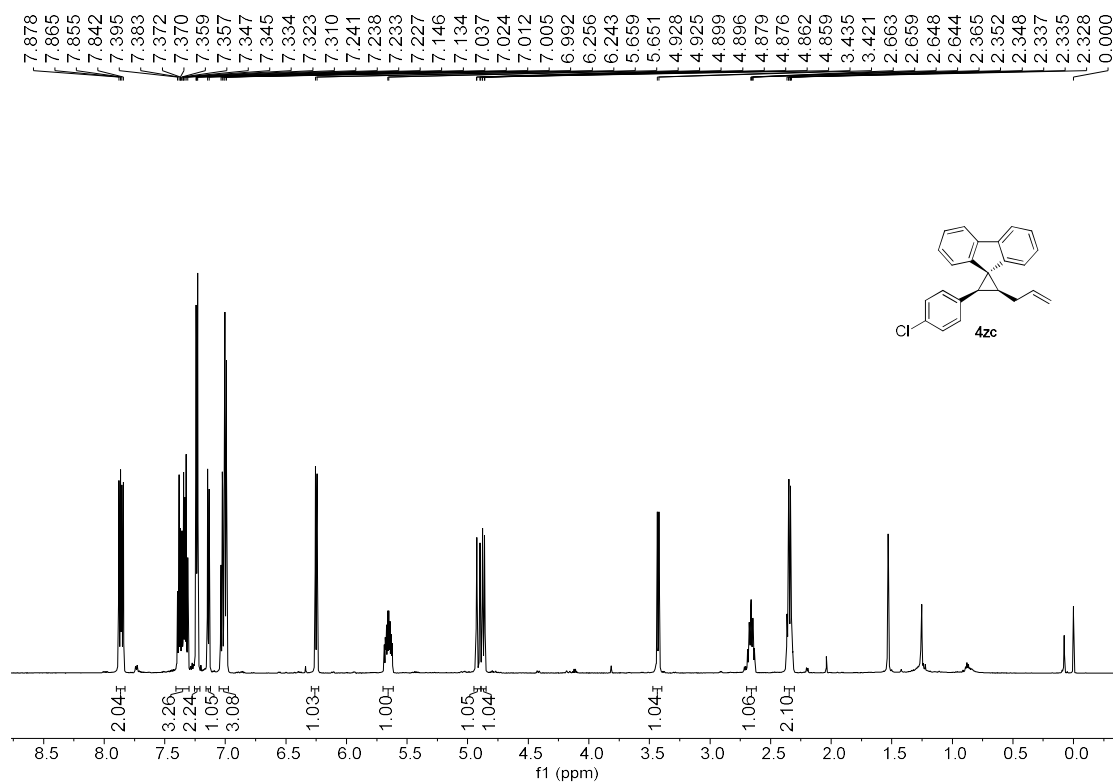

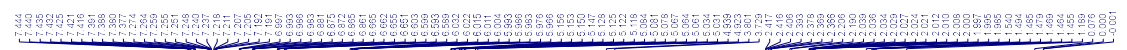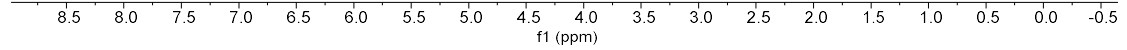

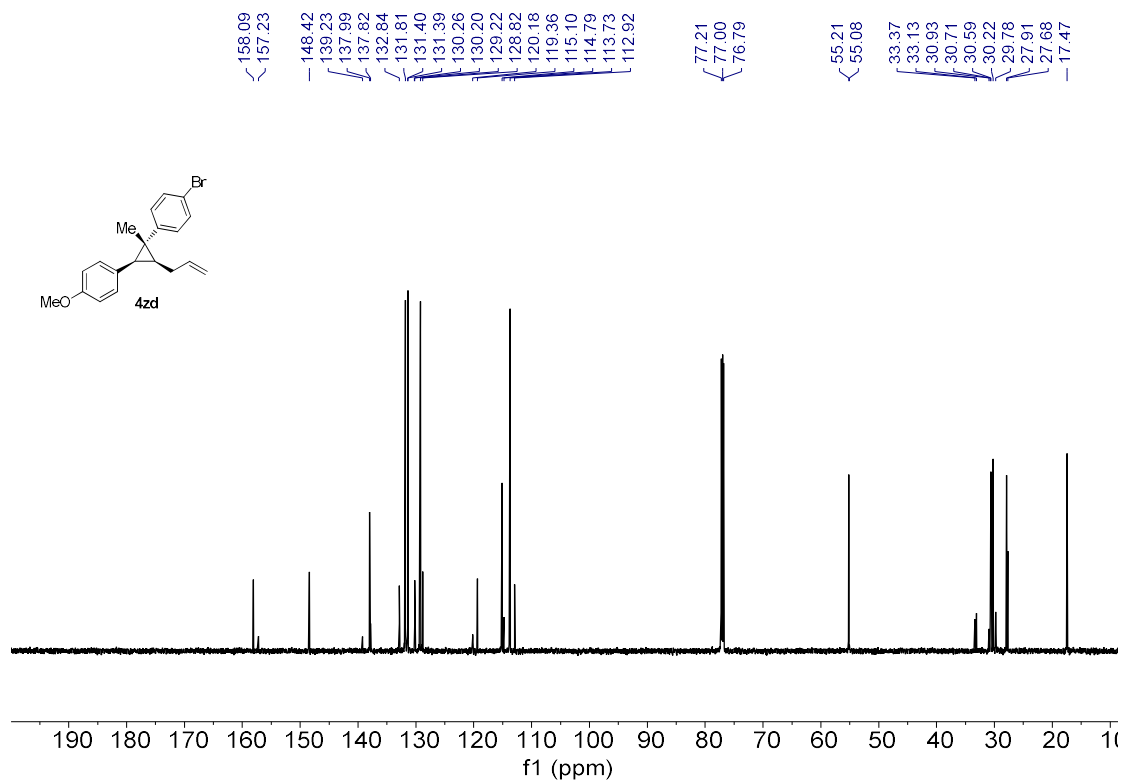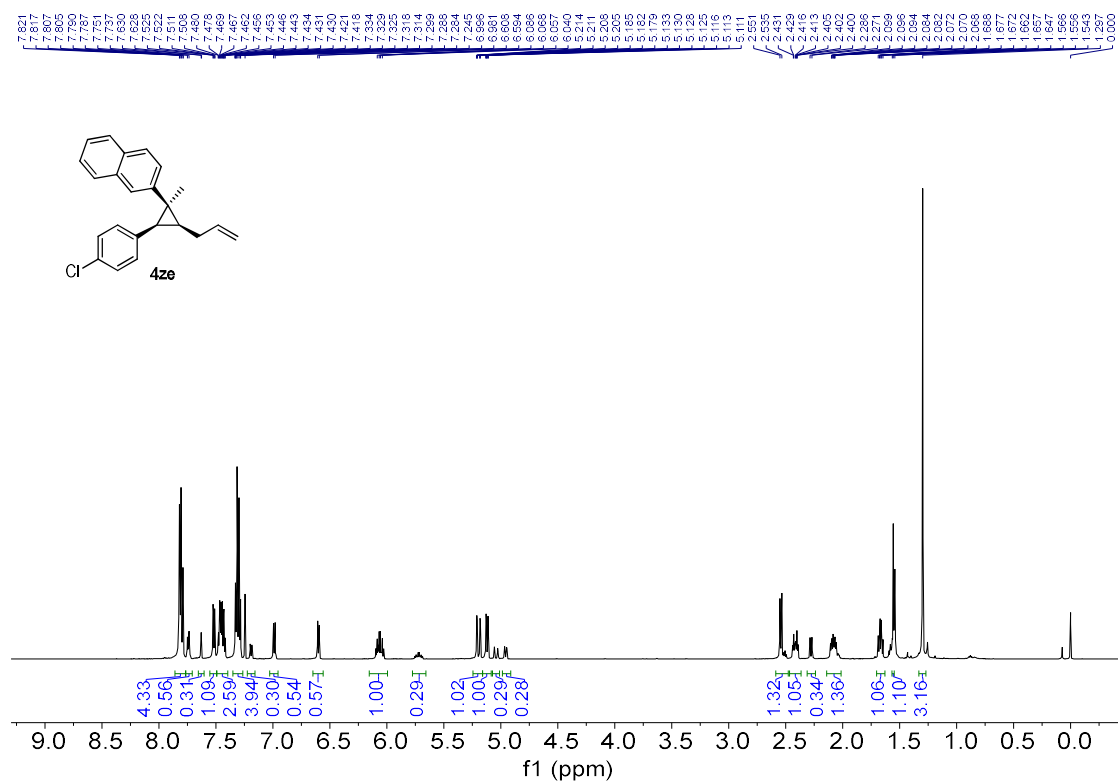

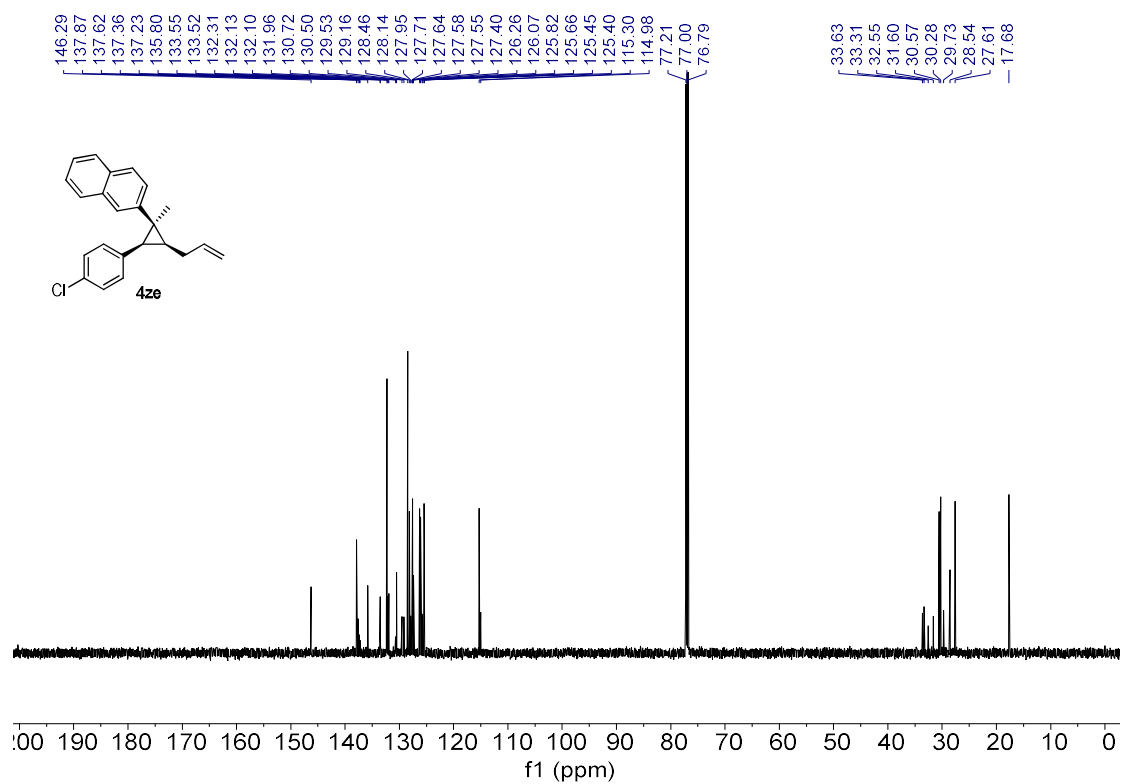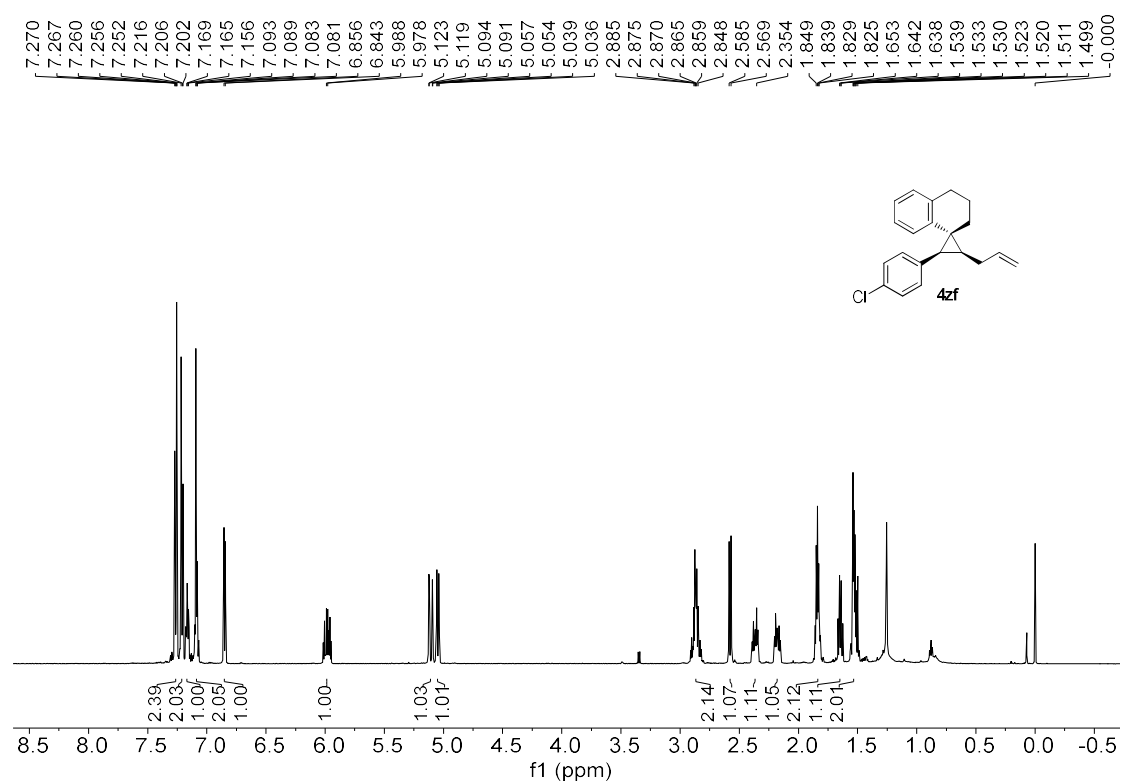

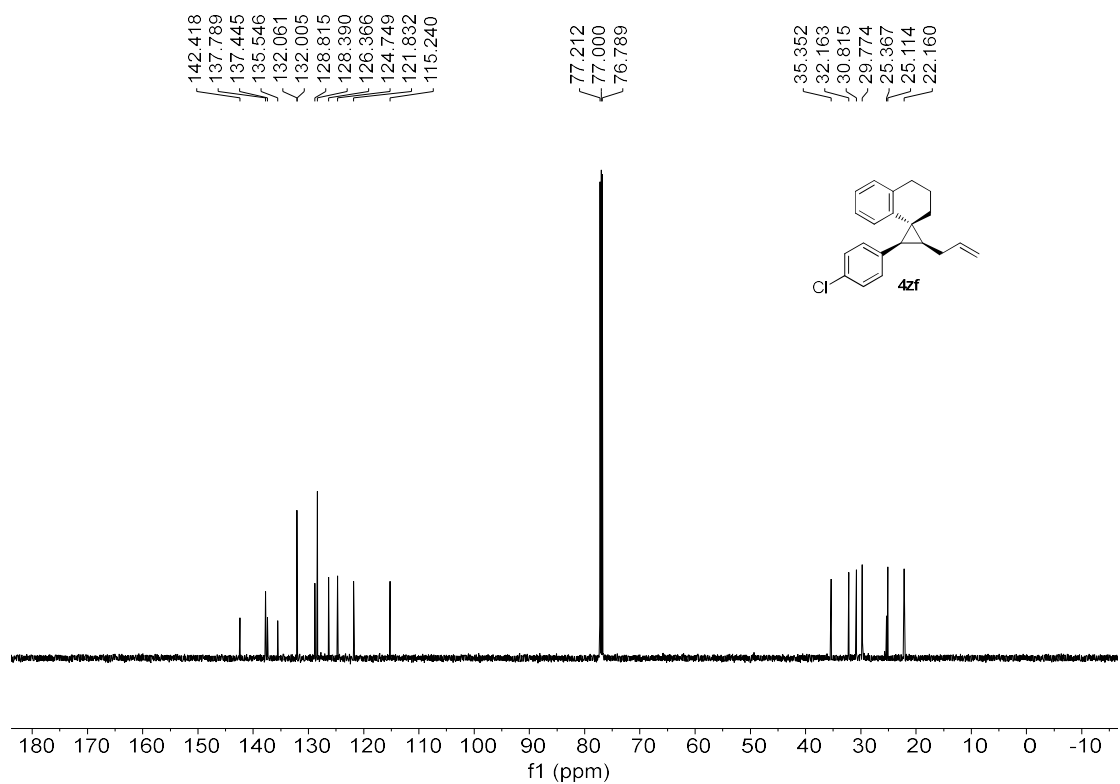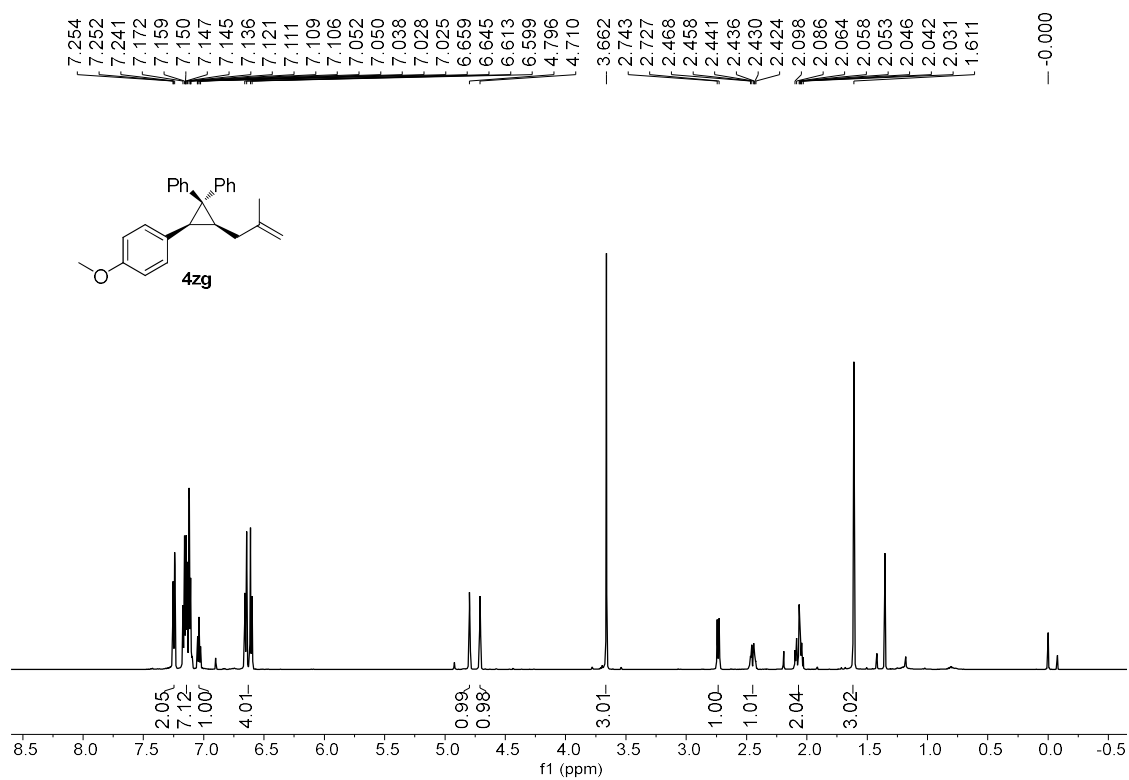

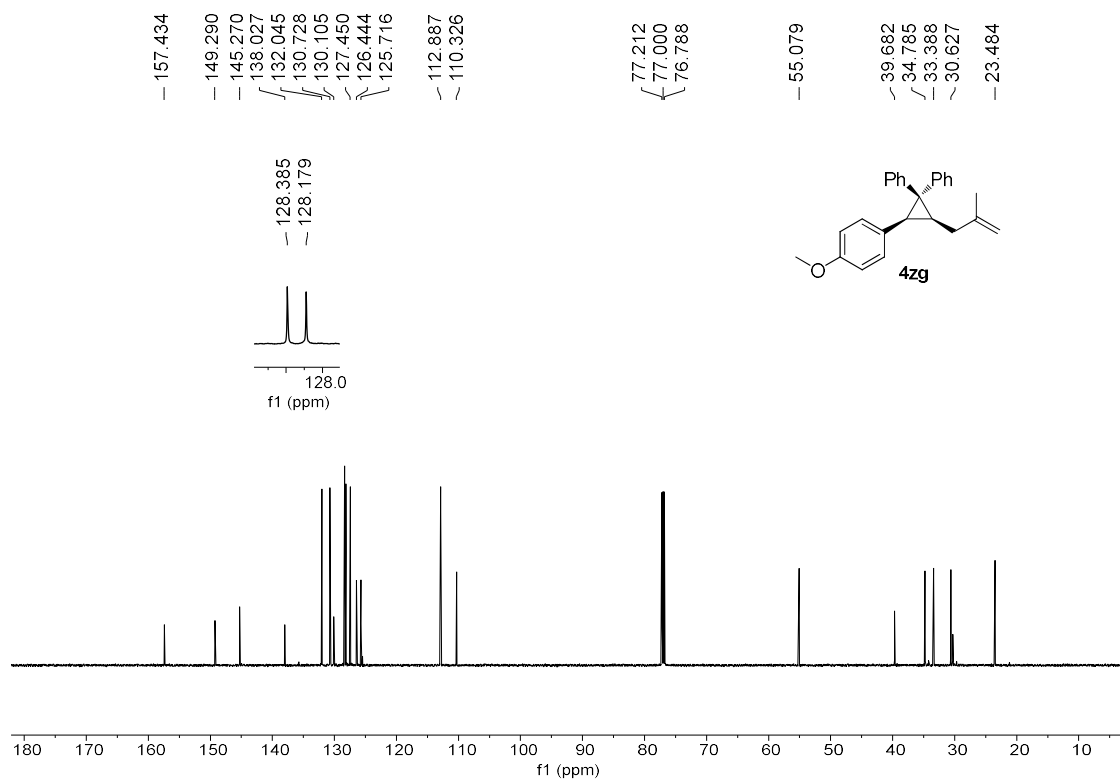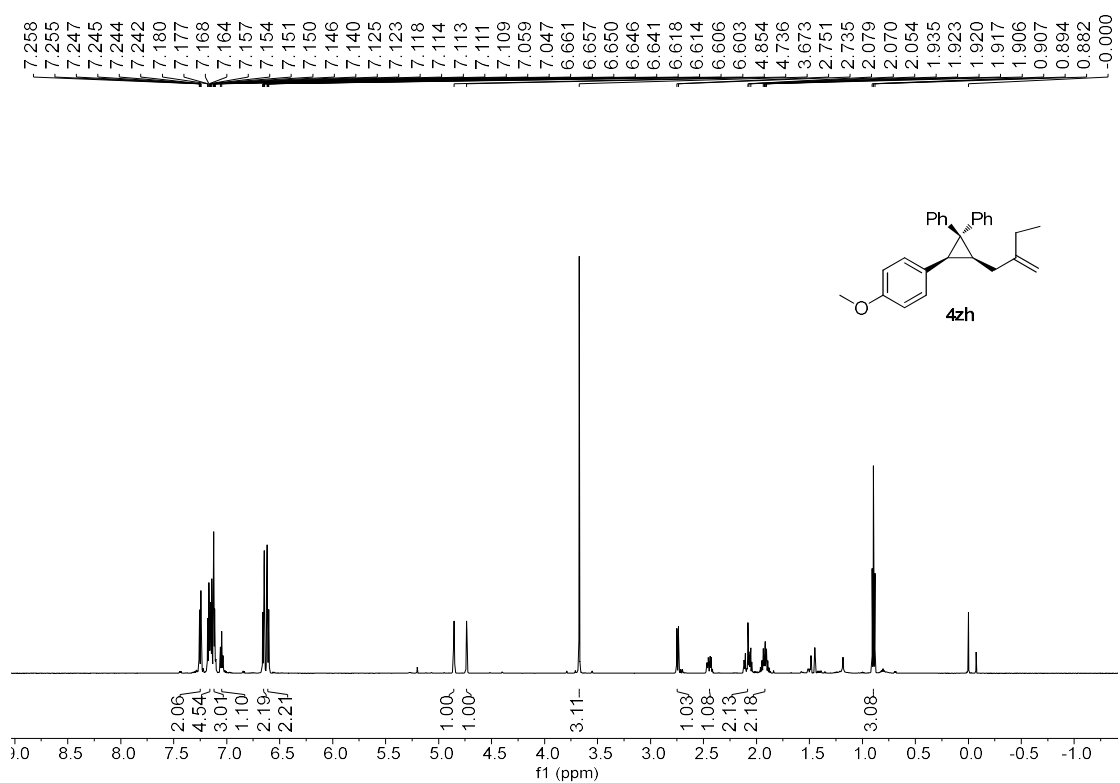



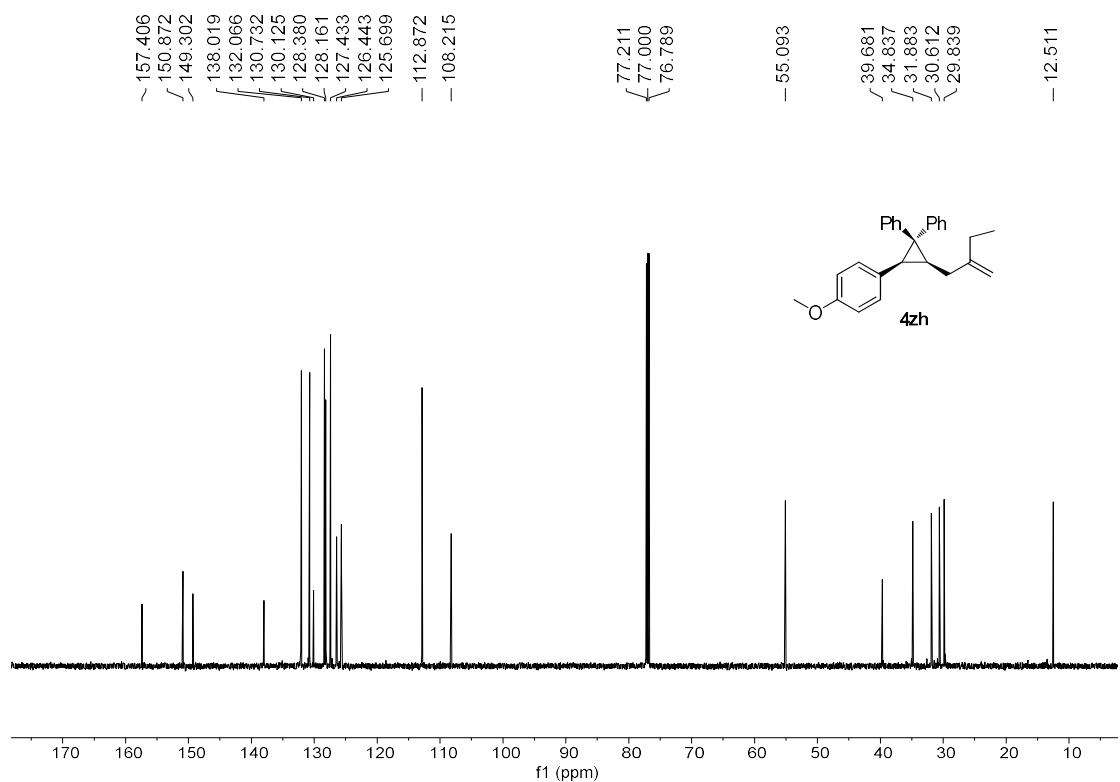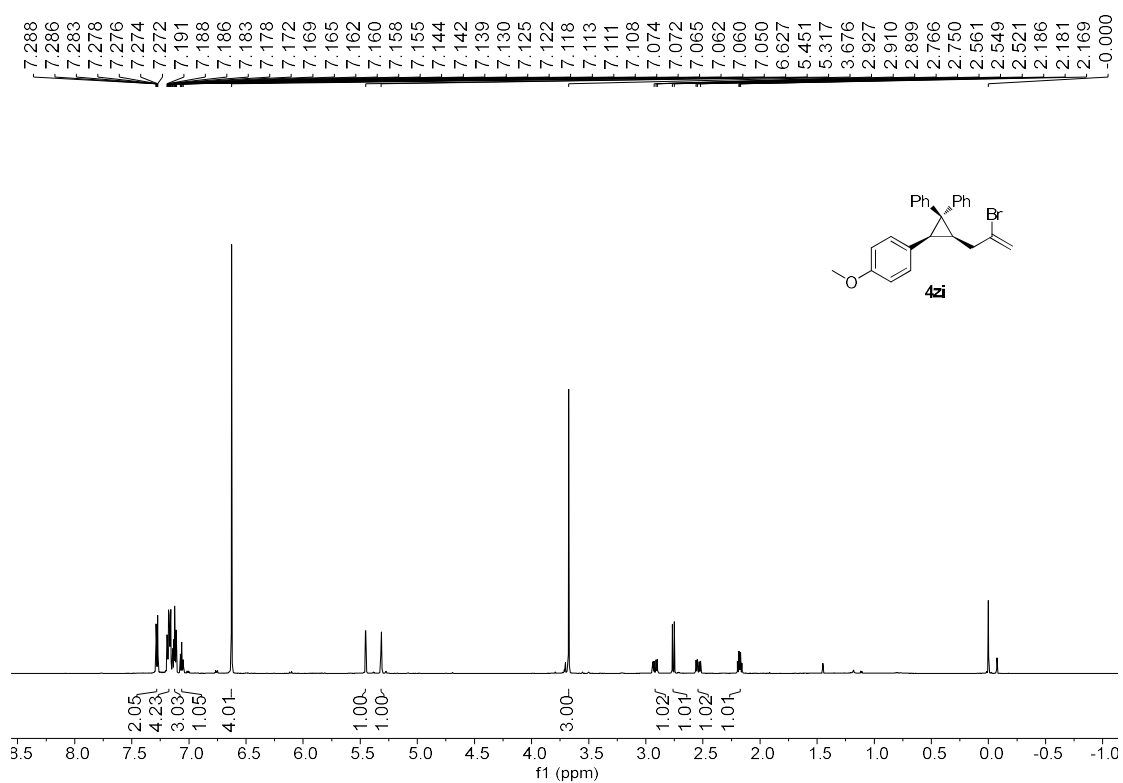

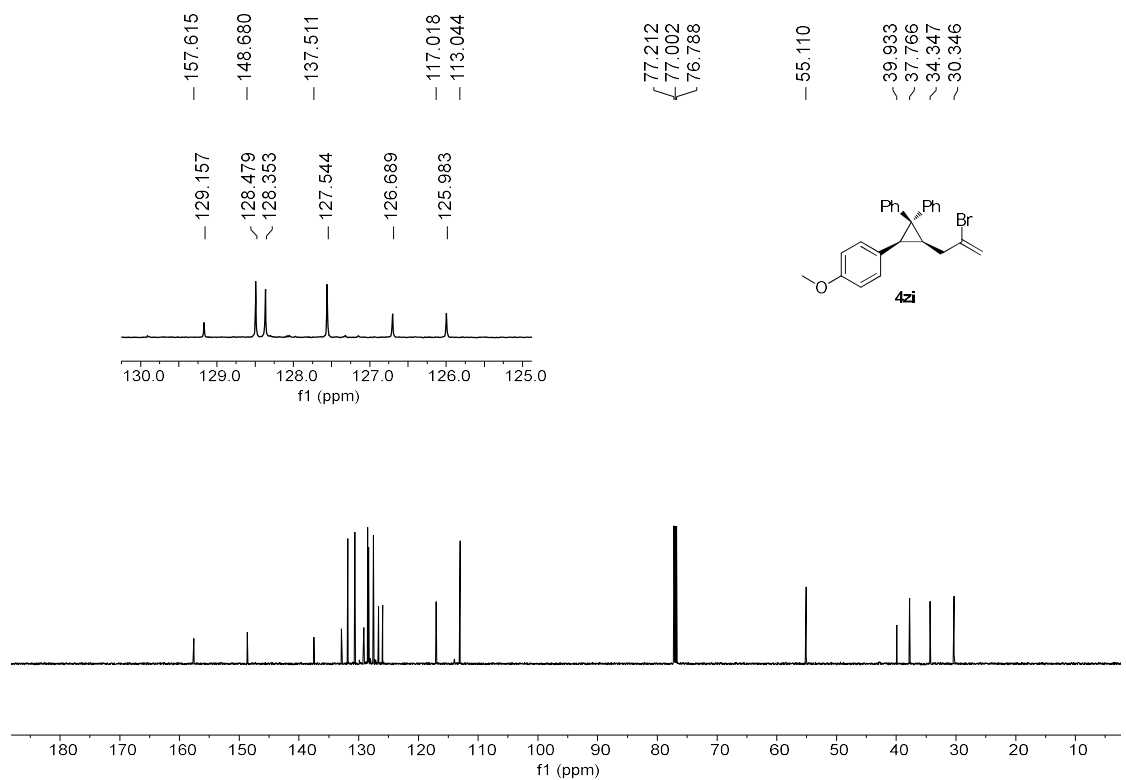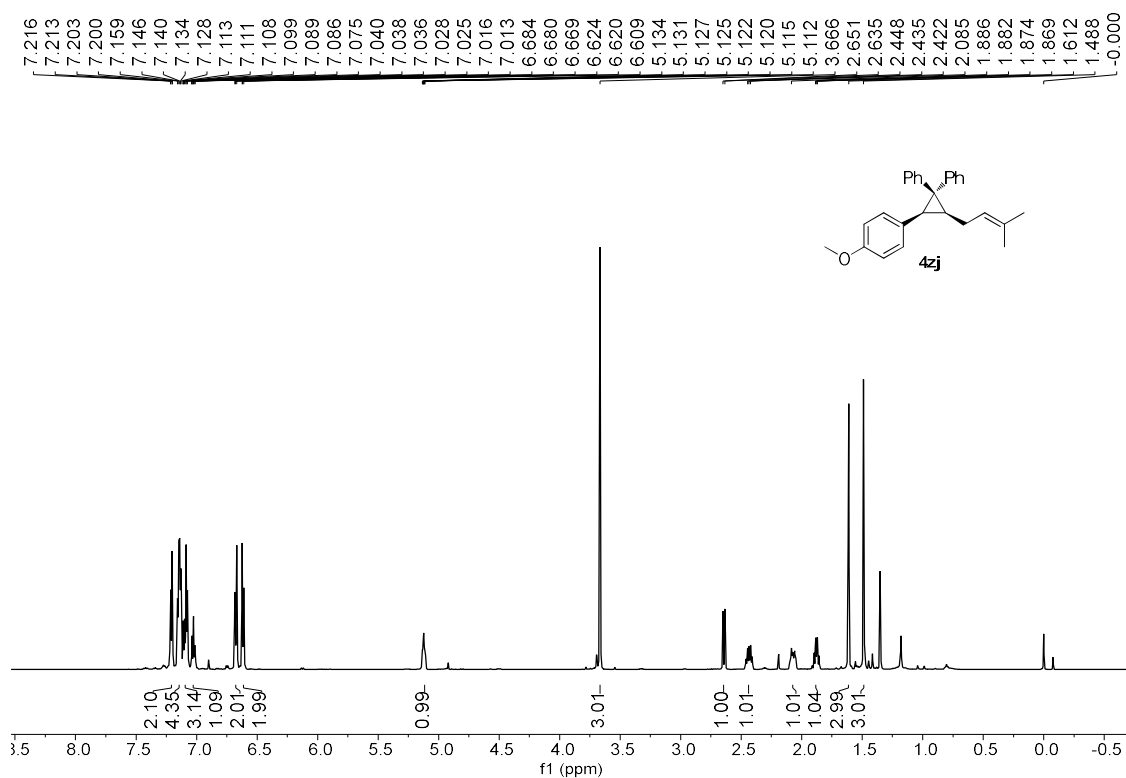

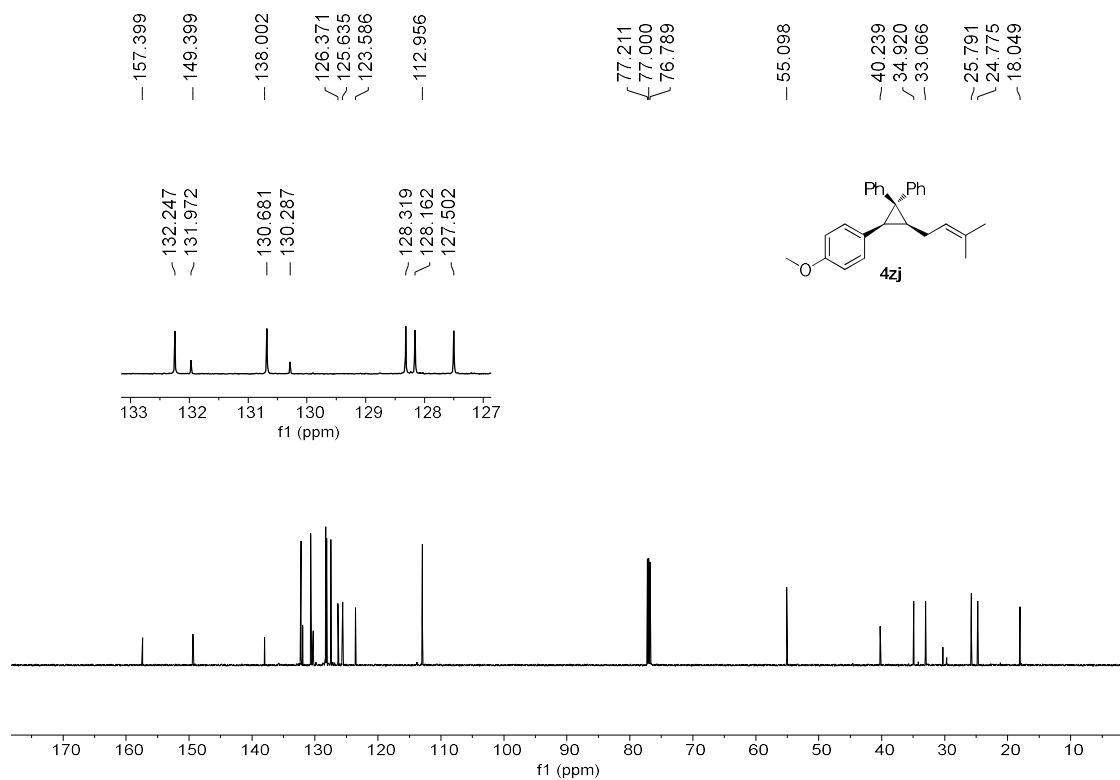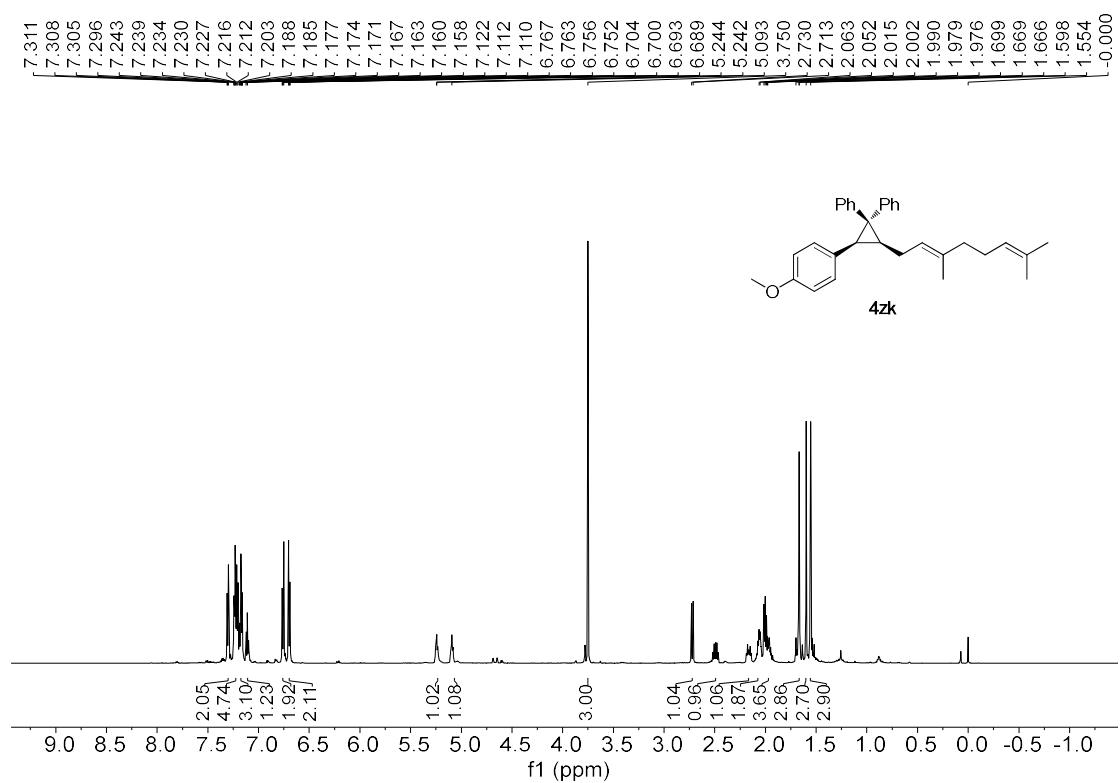



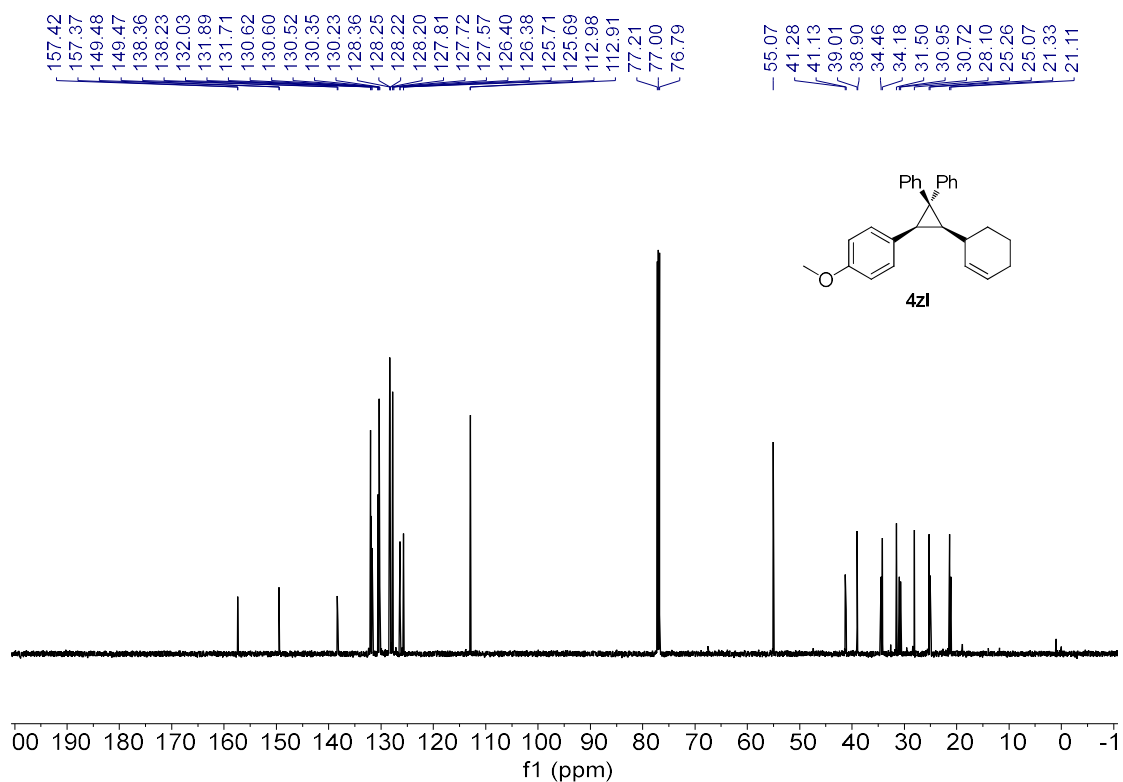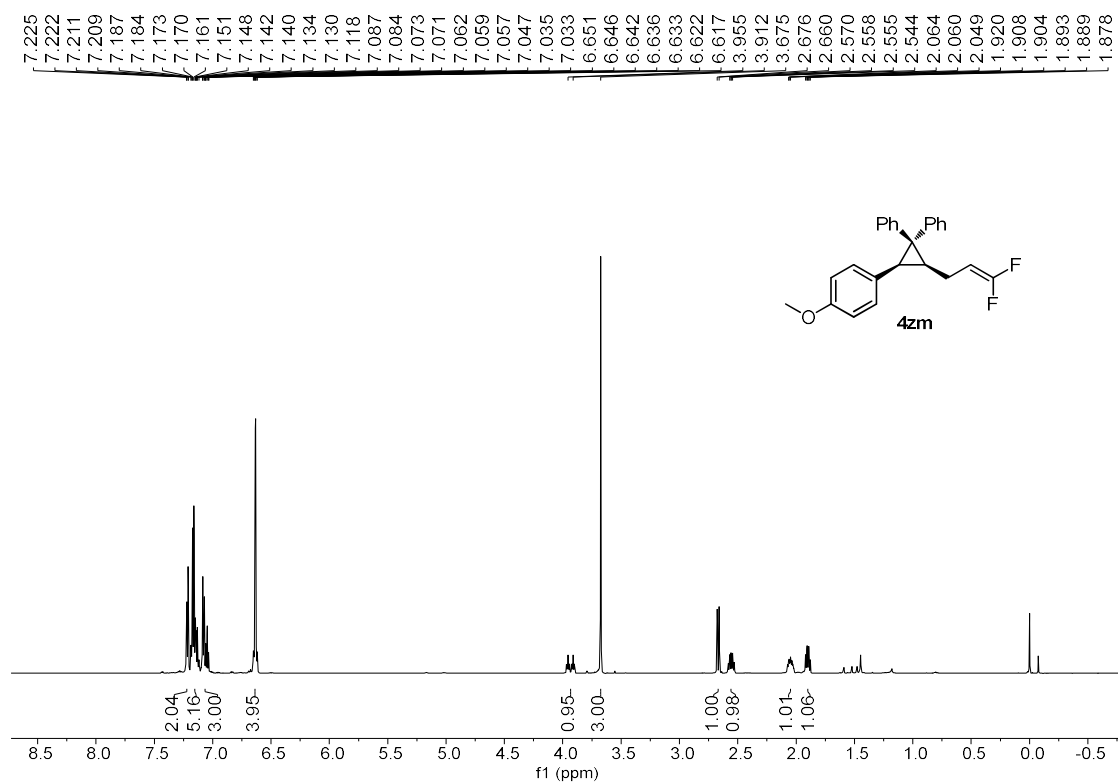

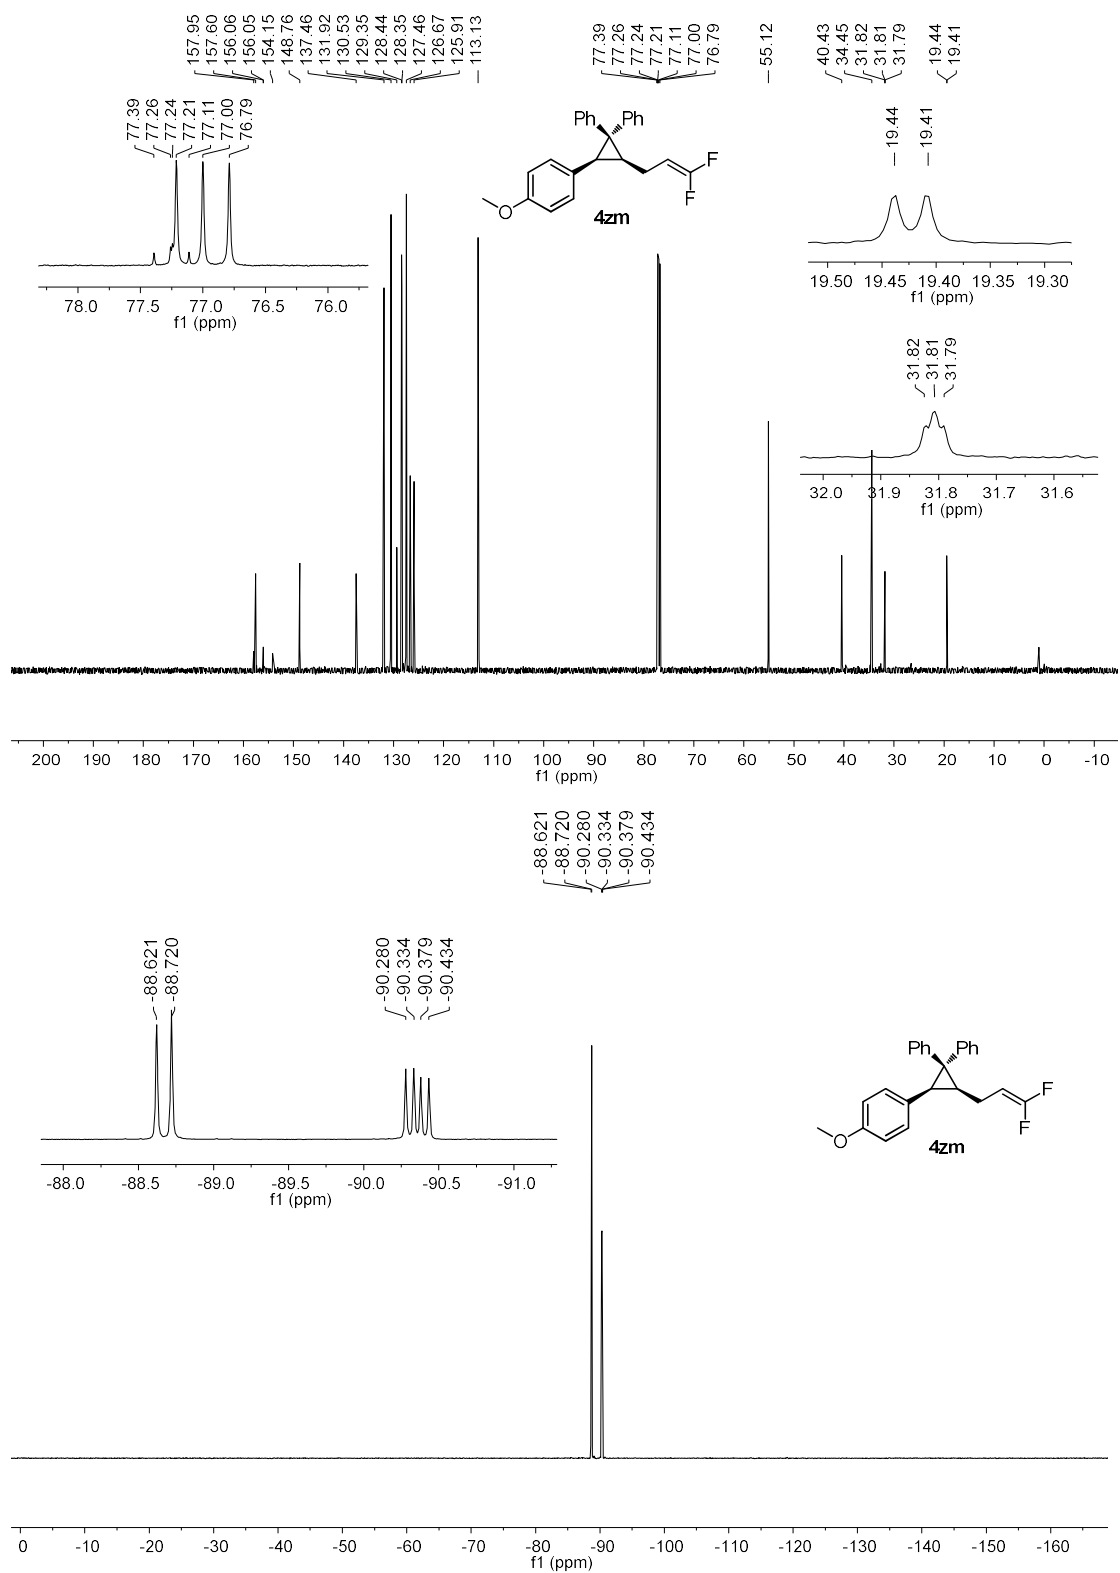

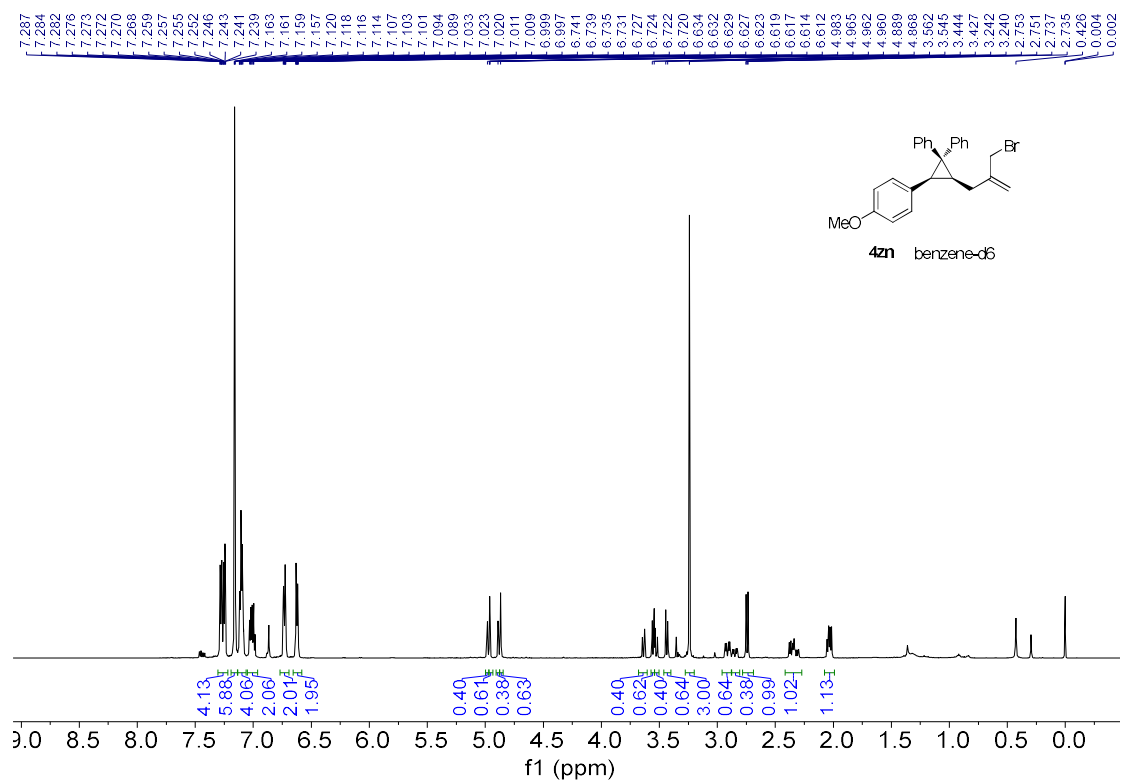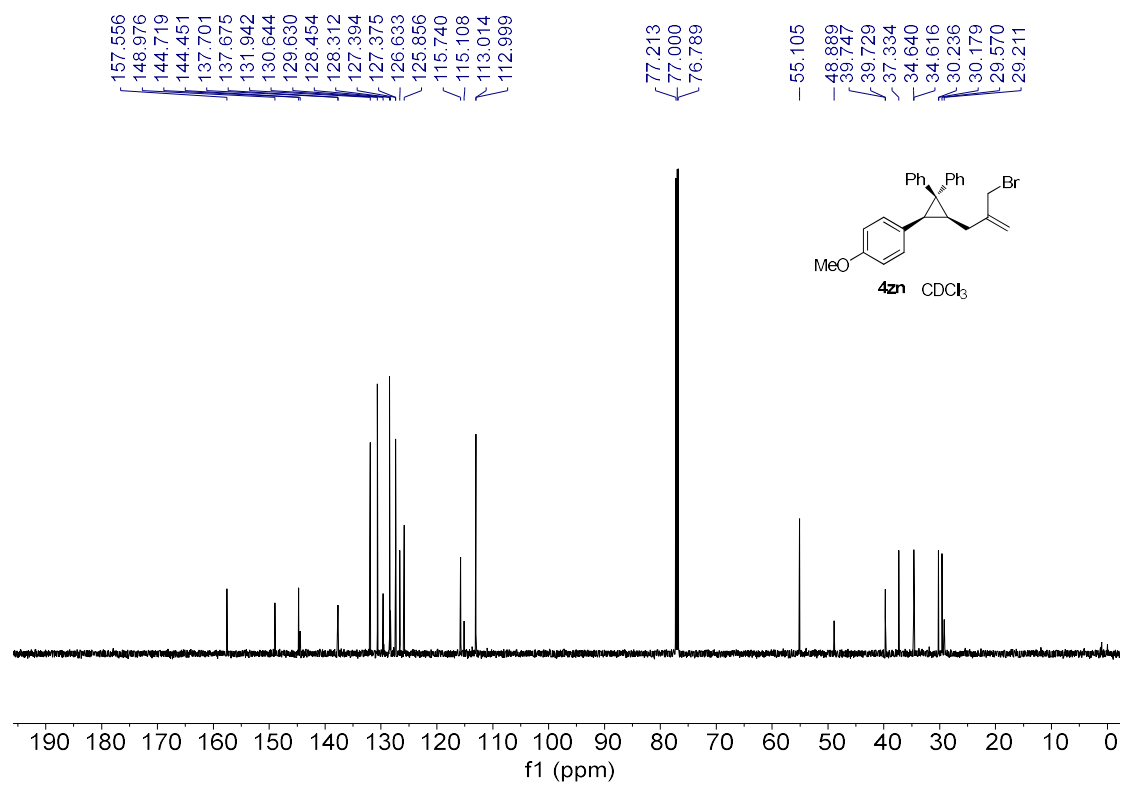

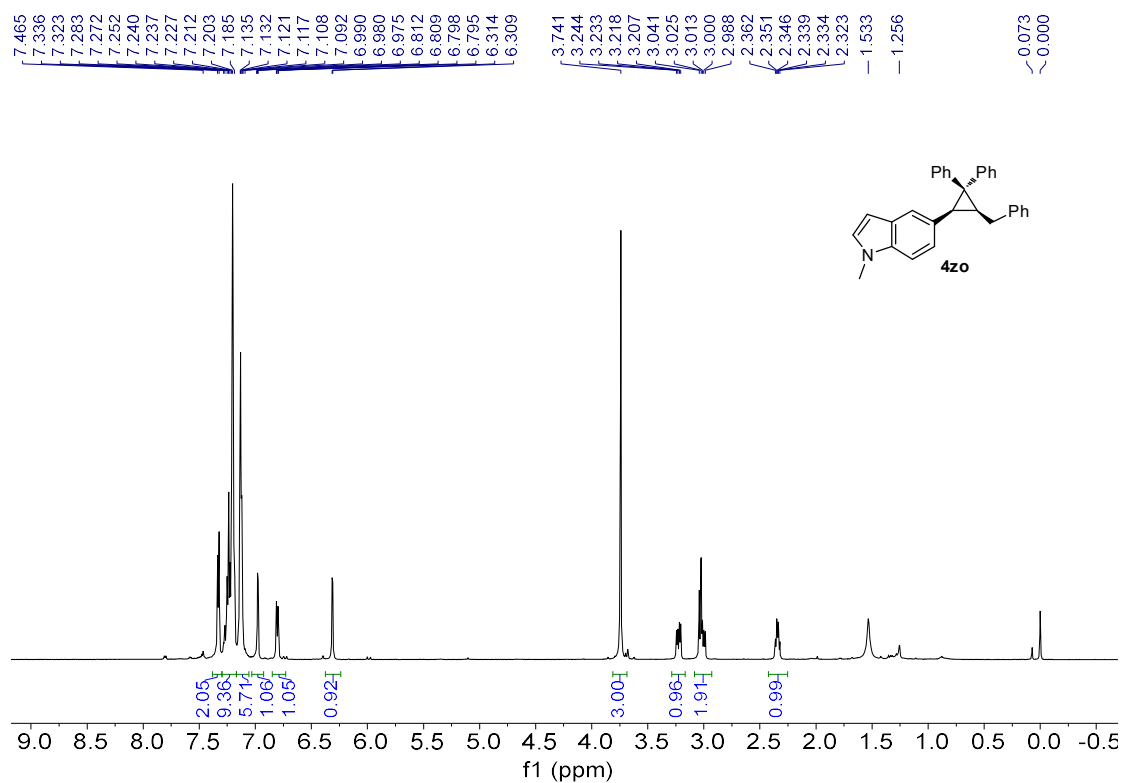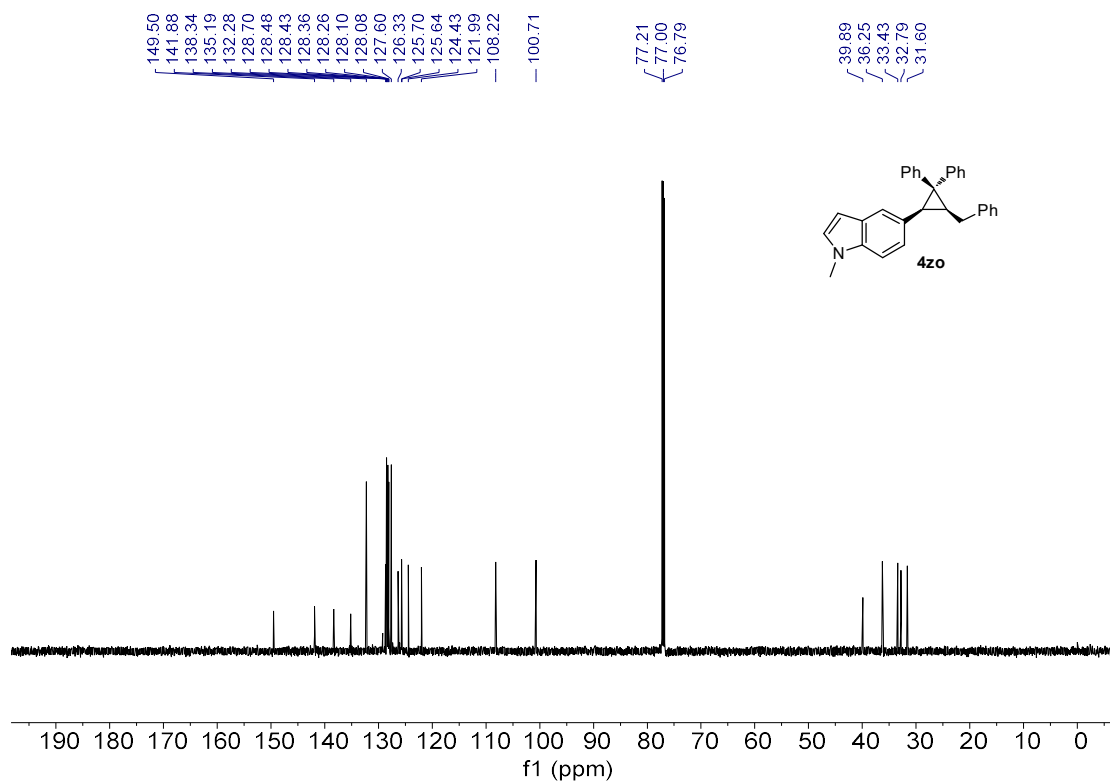



### HPLC traces of (+)-4e.

HPLC conditions: chiralpak OD-H column, hexanes/i-PrOH = 99/1, 1 mL/min,  $\tau$  (major) = 4.9 min;  $\tau$  (minor) = 5.6 min.

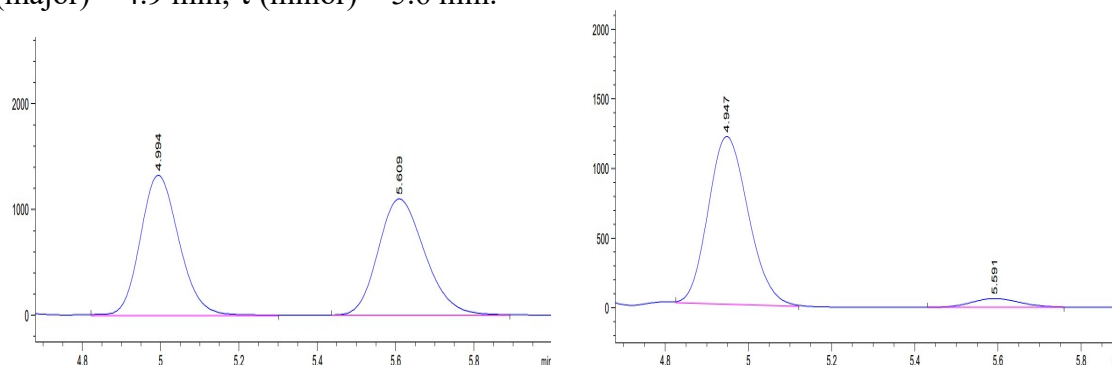

#### *Racemic:*

| Peak | PetTime | Type | Width(min) | Area(mAu*S) | Hight(mAu) | Area%   |
|------|---------|------|------------|-------------|------------|---------|
| 1    | 4.994   | MM R | 0.1148     | 9141.33008  | 1327.40552 | 50.1945 |
| 2    | 5.609   | MM R | 0.1376     | 9070.47559  | 1098.53735 | 49.8055 |

#### *Chiral:*

| Peak | PetTime | Type | Width(min) | Area(mAu*S) | Hight(mAu) | Area%   |
|------|---------|------|------------|-------------|------------|---------|
| 1    | 4.947   | MM R | 0.1095     | 8078.30518  | 1204.73352 | 94.0192 |
| 2    | 5.591   | MM R | 0.1261     | 513.88239   | 63.11434   | 5.9808  |
